# Supplementary material for: Progress towards one health approach for dog-mediated human rabies elimination in Bangladesh: on the way to zero by 30
Source: Research Square preprint supplement (doi:10.21203/rs.3.rs-3201454/v1), 2023-07-28
Supplement: Supplementary file 1 [file 3e424f2aca00dc296c32d28b.xlsx]

## Sheet: Total
Sl. No.	Data Source	Case year	Age	Sex	Residence type	Name of animal
1	IDH	2019	30	Male	Rural	Fox bite
2	IDH	2019	50	Female	Rural	Cat bite
3	IDH	2019	11	Male	Rural	Dog Bite
4	IDH	2019	35	Male	Rural	Dog Bite
5	IDH	2019	45	Male	Rural	Dog Bite
6	IDH	2019	35	Male	Rural	Dog Bite
7	IDH	2019	45	Male	Rural	Dog Bite
8	IDH	2019	22	Male	Rural	Fox bite
9	IDH	2019	6	Male	Rural	Dog Bite
10	IDH	2019	40	Male	Urban	Dog Bite
11	IDH	2019	40	Male	Rural	Dog Bite
12	IDH	2019	5	Male	Rural	Dog Bite
13	IDH	2019	9	Male	Urban	Dog Bite
14	IDH	2019	36	Male	Rural	Mongoose bite
15	IDH	2019	40	Male	Rural	Dog Bite
16	IDH	2019	9	Male	Rural	Dog Bite
17	IDH	2019	60	Male	Rural	Dog Bite
18	IDH	2019	23	Male	Rural	Dog Bite
19	IDH	2019		Female	Rural	Dog Bite
20	IDH	2019	5	Female	Rural	Dog Bite
21	IDH	2019	25	Male	Rural	Dog Bite
22	IDH	2019	25	Female	Rural	Dog Bite
23	IDH	2019		Male	Rural	Cat bite
24	IDH	2019	50	Female	Urban	Cat Scratch
25	IDH	2019	5	Male	Urban	Dog Bite
26	IDH	2019	2	Female	Rural	Dog Bite
27	IDH	2019	13	Male	Rural	Dog Bite
28	IDH	2019	28	Female	Rural	Mongoose bite
29	IDH	2019	30	Male	Rural	Dog Bite
30	IDH	2019	17	Male	Rural	Dog Bite
31	IDH	2019	36	Female	Rural	Cat bite
32	IDH	2019	38	Male	Rural	Dog Bite
33	IDH	2019	19	Female	Urban	Cat Scratch
34	IDH	2019	60	Male	Rural	Dog Bite
35	IDH	2019	60	Female	Rural	Cat Scratch
36	IDH	2019	69	Male	Rural	Mongoose bite
37	IDH	2019	50	Female	Urban	Dog Bite
38	IDH	2019	3	Male	Rural	Cat bite
39	IDH	2019	9	Male	Rural	Jackel bite
40	IDH	2019	26	Male	Rural	Dog Bite
41	IDH	2019	70	Male	Rural	Dog Bite
42	IDH	2019	35	Female	Rural	Jackel bite
43	IDH	2019	55	Male	Rural	Dog Bite
44	CDC	2019	25	Male	Urban	Dog Bite
45	CDC	2019	45	Female	Urban	Dog Bite
46	BITID	2019	4	Female	Rural	Dog Bite
47	BITID	2019	60	Female	Rural	Dog Bite
48	BITID	2019	4	Male	Rural	Dog Bite
49	BITID	2019	26	Male	Rural	Dog Bite
50	BITID	2019	29	Male	Urban	Dog Bite
51	BITID	2019	7	Male	Rural	Dog Bite
52	BITID	2019	5	Male	Urban	Dog Bite
53	BITID	2019	12	Male	Rural	Dog Bite
54	BITID	2019	25	Male	Rural	Dog Bite
55	BITID	2019	18	Male	Urban	Dog Bite
56	BITID	2019	35	Male	Rural	Dog Bite
57	BITID	2019	17	Male	Rural	Dog Bite
58	IDH	2020	50	Female	Rural	Dog Bite
59	IDH	2020	26	Male	Rural	Dog Bite
60	IDH	2020	55	Male	Rural	Fox bite
61	IDH	2020	8	Male	Rural	Dog Bite
62	IDH	2020	4	Male	Rural	Dog Bite
63	IDH	2020	50	Male	Rural	Dog Bite
64	IDH	2020	11	Male	Rural	Dog Bite
65	IDH	2020	15	Male	Rural	Dog Bite
66	IDH	2020	45	Male	Urban	Dog Bite
67	IDH	2020	60	Male	Rural	Dog Bite
68	IDH	2020	40	Male	Rural	Dog Bite
69	IDH	2020	42	Male	Rural	Dog Bite
70	IDH	2020	58	Male	Rural	Dog Bite
71	IDH	2020	60	Female	Rural	Dog Bite
72	IDH	2020	4	Male	Rural	Dog Bite
73	IDH	2020	35	Male	Rural	Jackel bite
74	IDH	2020	16	Female	Urban	Jackel bite
75	IDH	2020	9	Male	Urban	Jackel bite
76	CDC	2020	35	Female	Rural	Dog Bite
77	CDC	2020	26	Male	Rural	Dog Bite
78	BITID	2020	40	Female	Rural	Dog Bite
79	BITID	2020	60	Female	Rural	Dog Bite
80	BITID	2020	10	Female	Rural	Dog Bite
81	BITID	2020	50	Female	Rural	Dog Bite
82	BITID	2020	6	Female	Rural	Dog Bite
83	BITID	2020	22	Female	Rural	Dog Bite
84	IDH	2021	26	Male	Rural	Cat Scratch
85	IDH	2021	45	Male	Rural	Dog Bite
86	IDH	2021	3.5	Male	Rural	Dog Bite
87	IDH	2021	20	Female	Rural	Dog Bite
88	IDH	2021	6	Male	Rural	Dog Bite
89	IDH	2021	8	Male	Rural	Dog Bite
90	IDH	2021	32	Male	Rural	Dog Bite
91	IDH	2021	50	Female	Rural	Dog Bite
92	IDH	2021	37	Male	Rural	Dog Bite
93	IDH	2021	10	Male	Urban	Dog Bite
94	IDH	2021	8	Male	Rural	Cat Scratch
95	IDH	2021	11	Male	Rural	Unknown
96	IDH	2021	45	Male	Rural	Dog Bite
97	IDH	2021	38	Male	Rural	Dog Bite & scratch
98	IDH	2021	30	Female	Rural	dog scrstch
99	IDH	2021	60	Female	Urban	Unknown
100	IDH	2021	35	Male	Rural	dog bite
101	IDH	2021	55	Male	Rural	dog bite
102	IDH	2021	40	Male	Rural	dog scratch
103	IDH	2021	6	Male	Rural	dog bite
104	IDH	2021	18	Male	Rural	dog bite
105	IDH	2021	40	Male	Rural	dog bite
106	IDH	2021	22	Female	Rural	dog bite
107	IDH	2021	18	Female	Rural	dog bite
108	IDH	2021	35	Male	Rural	dog bite
109	IDH	2021	35	Male	Rural	Dog bite
110	IDH	2021	35	Male	Rural	Dog bite
111	IDH	2021	35	Male	Rural	Dog bite
112	IDH	2021	50	Male	Rural	Dog bite
113	IDH	2021	50	Male	Rural	Dog bite
114	IDH	2021	11	Male	Rural	Dog bite
115	Rangpur	2021	12	Male	Rural	Dog bite
116	BITID	2021	2.4	Male	Rural	Dog bite
117	BITID	2021	6	Male	Rural	Dog bite
118	BITID	2021	5	Male	Rural	Dog bite
119	IDH	2021	50	Female	Rural	Fox bite
120	IDH	2021	4	Female	Rural	dog bite
121	IDH	2021	42	Female	Rural	dog bite
122	IDH	2021	72	Male	Rural	dog bite
123	IDH	2021	50	Male	Urban	Dog bite
124	IDH	2022	43yrs	Male	Rural	Fox bite
125	IDH	2022	80yrs	Female	Rural	Cat Scratch
126	IDH	2022	45yrs	Male	Rural	Dog bite
127	IDH	2022	18yrs	Male	Rural	Dog bite
128	IDH	2022	75yrs	Male	Rural	Dog bite
129	IDH	2022		Male	Rural	Dog bite
130	IDH	2022	28yrs	Male	Rural	Fox bite
131	IDH	2022	52yrs	Male	Urban	Dog bite
132	IDH	2022	5yrs	Female	Rural	Dog bite
133	IDH	2022	40yrs	Male	Rural	Dog bite
134	IDH	2022	51yrs	Male	Rural	Dog bite
135	IDH	2022	56yrs	Male	Rural	Dog bite
136	IDH	2022	50yrs	Female	Rural	Dog bite
137	IDH	2022	45yrs	Male	Rural	Dog bite
138	IDH	2022	8yrs	Male	Rural	Dog bite
139	IDH	2022	3.5yrs	Male	Rural	Dog bite
140	IDH	2022	4yrs	Female	Rural	Dog bite
141	IDH	2022	5yrs	Male	Rural	Dog bite
142	IDH	2022	11yrs	Male	Rural	Dog bite
143	IDH	2022	30yrs	Male	Rural	Dog bite
144	IDH	2022	2yrs	Male	Rural	Dog bite
145	BITID	2022	38yrs	Male	Rural	Dog bite
146	BITID	2022	45yrs	Male	Rural	Dog bite
147	IDH	2022	2.9yrs	Male	Urban	Dog bite
148	IDH	2022	3yrs	Male	Rural	Dog bite
149	IDH	2022	10yrs	male	Rural	Dog bite
150	IDH	2022	60yra	Male	Rural	Dog bite
151	IDH	2022		Male	Rural	Fox bite
152	IDH	2022	4yrs	Female	Rural	Dog bite
153	IDH	2022		Male	Rural	Dog bite
154	IDH	2022		Female	Rural	Dog bite
155	IDH	2022	23yrs	Male	Rural	Dog bite
156	IDH	2022	4yrs	Male	Rural	Dog bite
157	IDH	2022	7yrs	Male	Rural	Dog bite
158	Dinazpur	2022	45yrs	Male	Rural	Dog bite
159	IDH	2022	45yrs	Female	Rural	Dog bite
160	IDH	2022	49yrs	Male	Rural	Dog bite
161	IDH	2022	7yrs	Male	Rural	Dog bite
162	IDH	2022	45yrs	Male	Rural	Dog bite
163	IDH	2022	7yrs	Male	Rural	Dog bite
164	IDH	2022	5yrs	Female	Rural	Dog bite
165	IDH	2022	8.5yrs	Male	Rural	Dog bite
166	IDH	2022	11yrs	Male	Rural	Dog bite
167	idh	2022		Female	Rural	Dog bite
168	IDH	2022	4yrs	Male	Rural	Dog bite
169	IDH	2023	24yrs	male	Rural	Fox bite
170	IDH	2023	7yrs	Female	Urban	Dog bite
171	IDH	2023	18yrs	Female	rural	Fox bite
172	mathbaria,pirojpur health complex	2023	47yrs	male	rural	Dog bite
173	IDH	2023	38yrs	male	rural	Dog bite
174	mathbaria,Pirojpur	2023	32yrs	male	rural	Dog bite
