# Supplementary material for: Progress towards one health approach for dog-mediated human rabies elimination in Bangladesh: on the way to zero by 30
Source: Research Square preprint supplement (doi:10.21203/rs.3.rs-3201454/v1), 2023-07-28
Supplement: Supplementary file 2 [file 456120dc038f5452e66bd440.xlsx]

## Sheet: Final_Data_Set
Sl. No	Division	Center Name	District	Year	Months	AttackDogs	AttackOtherAnimals	VictimMale	VictimFemale	AgeLess15yr	AgeMore15yr	BiteCategoryI	BiteCategoryII	BiteCategoryIII	NumRIGUsed	RabiesPatients
1	Dhaka	Infectious Disease Hospital (IDH)	Dhaka	2019	January	4972	1776	4500	2248	1252	5496		3835	2913		1
2	Dhaka	Civil Surgeon Office, Gopalganj	Gopalganj	2019	January	225	153	200	178	168	210	13	288	77	108
3	Dhaka	Shaheed Tajuddin Ahmed Medical College Hospital Gazipur	Gazipur	2019	January	1624	523			947	1200		537
4	Dhaka	250 Bed General Hospital Kishoreganj	Kishoreganj	2019	January	514	190	369	335	215	489	0	635	69	130	0
5	Dhaka	Sadar Hospital Madaripur	Madaripur	2019	January	180	270	212	238	195	255	0	339	111	0	0
6	Dhaka	250 Bed General Hospital Manikganj	Manikganj	2019	January	2500	892	1865	1527	1290	2102	21	2569	802	0	0
7	Dhaka	250 Bed General Hospital Tangail	Tangail	2019	January	1771	1572	1417	1926	1500	1843		3251	92	67
8	Dhaka	Shaheed Ahsan Ullah Master General Hospital Tongi	Gazipur	2019	January	264	81	199	146	110	235		330	15
9	Dhaka	Kurmitola General Hospital Kurmitola Dhaka	Dhaka	2019	January	45	25	40	30	22	48	35	23	12	2
10	Dhaka	Sadar Hospital Shariatpur	Shariatpur	2019	January	220	286	200	266	230	236	50	386	30	10	0
11	Dhaka	Sadar Hospital Narsingdi	Narshingdi	2019	January	240	82	114	208	139	183	0	217	105	11	0
12	Dhaka	Civil Surgeon Office Faridpur	Faridpur	2019	January	349	199	356	192	164	384	0	491	57	86	0
13	Dhaka	General Hospital Munshiganj	Munshiganj	2019	January	64	96	140	120	135	125	0	240	20	18
14	Dhaka	General Hospital Narayanganj	Narayanganj	2019	January	530	114	300	230						78
15	Dhaka	Sadar Hospital Rajbari	Rajbari	2019	January	121	118	178	103	75	164	5	134	5	10
16	Mymensing	Mymesing Medical College hospital Mymensing	Mymensingh	2019	January	568	390	592	366	260	698	0	712	246	0	0
17	Mymensing	Adhunik Sadar Hospital Netrokona	Netrakona	2019	January	231	131	251	111	200	162	0	360	2	0	0
18	Mymensing	Zila Hospital Sherpur	Sherpur	2019	January	168	209	265	112	127	250	50	307	15	15	0
19	Mymensing	250 Bed General Hospital Jamalpur	Jamalpur	2019	January	48	72	70	50	80	40		100	20	20	0
20	Chittagong	250 Bed Zila Sadar Hospital Brahmanbaria	Brahamanbaria	2019	January	542	50	324	268	309	283	0	562	30	30	0
21	Chittagong	250 Bed General Hospital Chandpur	Chandpur	2019	January	133	58	101	90	93	98		173	18	28
22	Chittagong	BITID Chittagong	Chittagong	2019	January	152	61	70	143	92	121		137	76		3
23	Chittagong	General Hospital Comilla	Comilla	2019	January	135	33	102	66	56	112		155	13	13
24	Chittagong	250 Bed General Hospital Cox’s Bazar	Cox'S Bazar	2019	January	250	61	204	107	167	144	13	291	7	7
25	Chittagong	250 Bed General Hospital Feni	Feni	2019	January	275	90	150	215	265	100	-	340	25	25	0
26	Chittagong	Adhunik General Hospital Khagrachari Hilly Zila Khagrachari	Khagrachhari	2019	January	102	8	72	38	26	84		79	31	31
27	Chittagong	Sadar Hospital Lakshmipur	Lakshmipur	2019	January	171	79	130	120	114	136		239	11
28	Chittagong	250 Bed General Hospital Noakhali	Noakhali	2019	January	360	60	219	201	193	227	28	170	250
29	Chittagong	General Hospital Rangamati	Rangamati	2019	January	92	19	76	35	27	84	13	98	0	0	0
30	Chittagong	250 Bed General Hospital Chittagong	Chittagong	2019	January	399	163	403	159	225	337		304	258	423
31	Chittagong	Civil Surgeon Office Bandarban Hilly Zila Bandarban	Bandarban	2019	January	95	31	98	28	69	57	97	24	5	19	0
32	Sylhet	Sylhet Shaheed Shamsuddin Ahmed Hospital Sylhet	Sylhet	2019	January	115	62	115	62	67	110	0	177	0	0
33	Sylhet	Adhunik Zila Sadar Hospital Habiganj	Habiganj	2019	January	95	37	93	39	70	62	0	115	17	0	0
34	Sylhet	250 Bed Zila Sadar Hospital Sunamganj	Sunamganj	2019	January	122	73	135	60	72	123	6	147	42	0	0
35	Sylhet	250 Bed Zila Sadar Hospital Moulvibazar	Maulvibazar	2019	January	85	45	80	50	50	80	0	120	10	130	0
36	Barisal	100 Bed Zila Sadar Hospital Barguna	Barguna	2019	January	158	170	108	320	178	200	30	250	48	48
37	Barisal	General Hospital Barisal	Barisal	2019	January	400	329	392	337	278	451		717	12	9
38	Barisal	Sdar Hospital Jhalokahti	Jhalokati	2019	January	179	236	170	245	205	210	0	338	77	20
39	Barisal	250 Bed Hospital patuakhali	Patuakhali	2019	January	182	103	115	170	100	185		280	5	10	0
40	Barisal	Sadar Hospital Pirojpur	Pirojpur	2019	January	211	270	179	302	171	310	0	476	5	11
41	Barisal	Sadar Hospital Bhola	Bhola	2019	January	85	152	132	105	150	87	6	230	1	0	0
42	Rangpur	250 Bed Zila Sadar Hospital Dinajpur	Dinajpur	2019	January	356	219	344	231	187	388	17	526	49
43	Rangpur	Zila Sdar Hopital Gaibandha	Gaibandha	2019	January	513	898	900	511	1210	201	100	1211	100		0
44	Rangpur	General Hospital Kurigram	Kurigram	2019	January	135	80	110	105	85	130		185	30	20
45	Rangpur	100 Bed Sadar Hospital Lalmonirhat	Lalmonirhat	2019	January	310	155	340	125	115	350		326	139
46	Rangpur	Adunik Sadar Hospital Nilphamari	Nilphamari	2019	January	379	297	378	298	241	435	17	676
47	Rangpur	Civil Surgeon Office Rangpur	Rangpur	2019	January	338	220	258	300	106	452		490	68	100
48	Rangpur	Sadar Hospital Panchagarh	Panchagarh	2019	January	102	158	110	150	80	180	0	152	8	0	0
49	Rangpur	Adhunik Sadar Hospital Thakurgaon	Thakurgaon	2019	January	252	147	241	158	143	256	4	367	28	20	0
50	Rajshahi	Rajshahi Medcial College Hospital	Rajshahi	2019	January	404	198			207	395	203	189	210	225
51	Rajshahi	Sadar Hospital Chapinawabganj	Nawabganj	2019	January	59	33			30	62	20	70	2
52	Rajshahi	250 Bed General Hospital Pabna	Pabna	2019	January	108	50	100	58	73	85	0	151	7	2
53	Rajshahi	250 Bed Mohammad Ali Zila Hospital Bogra	Bogra	2019	January	589	707	736	560	440	856		1046	250	246
54	Rajshahi	Adhunik Zila Hospital Joypurhat	Joypurhat	2019	January	133	168	157	140	189	108	51	89	157	0	0
55	Rajshahi	100 Bed Zila Sadar Hospital Naogaon	Naogaon	2019	January	132	95	150	87	107	130	0	225	12	9	0
56	Rajshahi	Adhunik Sadar Hospital Natore	Natore	2019	January	393	105	290	208	208	290	0	494	5	8	0
57	Rajshahi	General Hospital Sirajganj	Sirajganj	2019	January	49	11	47	13	18	82			60	102
58	Khulna	General Hospital Khulna	Khulna	2019	January	479	290	400	369	280	489		767	2	2
59	Khulna	Sadar Hospital Bagerhat	Bagerhat	2019	January	171	171	142	200	113	229	0	335	5	5	0
60	Khulna	Sadar Hospital Cuadanga	Chuadanga	2019	January	436	109	374	171	191	354	3	350	195	25	0
61	Khulna	250 Bed General Hospital Jessore	Jessore	2019	January	305	500	436	369	294	511	0	774	31	0	0
62	Khulna	Sadar Hospital Jhenaidah	Jhenaidah	2019	January	234	73	147	160	96	211	0	307	0	0	0
63	Khulna	250 Bed General Hospital Kustia	Kushtia	2019	January	279	98	250	127	231	146	201	121	55	0	0
64	Khulna	250 Bed General Hospital Magura	Magura	2019	January	189	103	172	120	83	109	5	220	67	5
65	Khulna	250 Bed General Hospital Meherpur	Meherpur	2019	January	241	64	65	240	250	55	0	300	5
66	Khulna	Sadar Hospital Narail	Narail	2019	January	131	42	102	71	55	118	4	136	33	0	0
67	Khulna	Sadar Hospital Satkhira	Satkhira	2019	January	502	75	296	281	183	394		530	47	47
68	Khulna	moniram	Jessore	2019	January	20	8	20	8	10	18	0	28	0	0	0
1	Dhaka	Infectious Disease Hospital (IDH)	Dhaka	2019	February	4393	1463	3841	2015	1023	4833		3537	2319		5
2	Dhaka	Civil Surgeon Office, Gopalganj	Gopalganj	2019	February	206	169	200	175	142	233	39	262	74	72
3	Dhaka	Shaheed Tajuddin Ahmed Medical College Hospital Gazipur	Gazipur	2019	February	1451	637			900	1188		522
4	Dhaka	250 Bed General Hospital Kishoreganj	Kishoreganj	2019	February	544	211	355	340	205	450	0	602	53	92	0
5	Dhaka	Sadar Hospital Madaripur	Madaripur	2019	February	191	259	220	230	204	246	0	338	112	0	0
6	Dhaka	250 Bed General Hospital Manikganj	Manikganj	2019	February	2179	825	1656	1348	1105	1899	23	2261	720	0	0
7	Dhaka	250 Bed General Hospital Tangail	Tangail	2019	February	1503	1302	1087	1718	905	1900		2712	93	68
8	Dhaka	Shaheed Ahsan Ullah Master General Hospital Tongi	Gazipur	2019	February	104	60	102	62	65	99		155	9
9	Dhaka	Kurmitola General Hospital Kurmitola Dhaka	Dhaka	2019	February	39	26	38	27	23	42	37	20	8	4
10	Dhaka	Sadar Hospital Shariatpur	Shariatpur	2019	February	160	208	150	218	180	188	45	294	30	13	0
11	Dhaka	Sadar Hospital Narsingdi	Narshingdi	2019	February	212	73	141	144	158	127	0	192	93	14	0
12	Dhaka	Civil Surgeon Office Faridpur	Faridpur	2019	February	310	145	213	242	114	341	0	423	32	49	0
13	Dhaka	General Hospital Munshiganj	Munshiganj	2019	February	155	95	135	115	143	107	0	226	24	24
14	Dhaka	General Hospital Narayanganj	Narayanganj	2019	February	388	130	200	188						62
15	Dhaka	Sadar Hospital Rajbari	Rajbari	2019	February	116	182	189	100	105	184	7	284	5	9
16	Mymensing	Mymesing Medical College hospital Mymensing	Mymensingh	2019	February	496	393	489	400	312	577	0	681	208	0	0
17	Mymensing	Adhunik Sadar Hospital Netrokona	Netrakona	2019	February	252	124	206	170	190	186	0	376	0	0	0
18	Mymensing	Zila Hospital Sherpur	Sherpur	2019	February	138	212	220	130	113	237	56	289	5	0	0
19	Mymensing	250 Bed General Hospital Jamalpur	Jamalpur	2019	February	212	275	290	197	287	200		467	20	20	0
20	Chittagong	250 Bed Zila Sadar Hospital Brahmanbaria	Brahamanbaria	2019	February	305	35	262	78	178	160	0	324	16	16	0
21	Chittagong	250 Bed General Hospital Chandpur	Chandpur	2019	February	117	54	104	67	89	82		161	10	19
22	Chittagong	BITID Chittagong	Chittagong	2019	February	135	62	116	81	74	143		113	86		1
23	Chittagong	General Hospital Comilla	Comilla	2019	February	154	18	104	68	58	114		142	30	30
24	Chittagong	250 Bed General Hospital Cox’s Bazar	Cox'S Bazar	2019	February	188	73	103	158	143	118	19	236	6	6
25	Chittagong	250 Bed General Hospital Feni	Feni	2019	February	130	60	90	100	100	90	-	159	31	31	0
26	Chittagong	Adhunik General Hospital Khagrachari Hilly Zila Khagrachari	Khagrachhari	2019	February	99	10	70	39	19	90		88	21	21
27	Chittagong	Sadar Hospital Lakshmipur	Lakshmipur	2019	February	79	21	60	40	43	57		99	1
28	Chittagong	250 Bed General Hospital Noakhali	Noakhali	2019	February	252	58	168	142	123	187	31	131	179
29	Chittagong	General Hospital Rangamati	Rangamati	2019	February	103	20	75	48	31	92	21	102	0	0	0
30	Chittagong	250 Bed General Hospital Chittagong	Chittagong	2019	February	373	158	384	147	215	316		318	213	356
31	Chittagong	Civil Surgeon Office Bandarban Hilly Zila Bandarban	Bandarban	2019	February	98	38	91	45	65	71	104	17	15	30	0
32	Sylhet	Sylhet Shaheed Shamsuddin Ahmed Hospital Sylhet	Sylhet	2019	February	83	96	110	69	59	120	0	179	0	0
33	Sylhet	Adhunik Zila Sadar Hospital Habiganj	Habiganj	2019	February	90	24	77	37	38	76	0	108	6	0	0
34	Sylhet	250 Bed Zila Sadar Hospital Sunamganj	Sunamganj	2019	February	83	75	98	60	67	91	0	117	41	0	0
35	Sylhet	250 Bed Zila Sadar Hospital Moulvibazar	Maulvibazar	2019	February	115	35	80	70	63	87	0	135	15	150	0
36	Barisal	100 Bed Zila Sadar Hospital Barguna	Barguna	2019	February	153	170	110	220	150	273	50	250	23	23
37	Barisal	General Hospital Barisal	Barisal	2019	February	283	291	347	227	221	353		564	10	13
38	Barisal	Sdar Hospital Jhalokahti	Jhalokati	2019	February	110	167	118	159	126	151		190	87	13
39	Barisal	250 Bed Hospital patuakhali	Patuakhali	2019	February	140	142	120	162	140	142		275	7	14	0
40	Barisal	Sadar Hospital Pirojpur	Pirojpur	2019	February	147	213	155	205	132	228	0	356	4	8
41	Barisal	Sadar Hospital Bhola	Bhola	2019	February	75	123	97	101	75	123	3	195	0	0	0
42	Rangpur	250 Bed Zila Sadar Hospital Dinajpur	Dinajpur	2019	February	261	208	211	258	143	316	13	428	41
43	Rangpur	Zila Sdar Hopital Gaibandha	Gaibandha	2019	February	501	796	900	397	1000	297	90	1027	80		0
44	Rangpur	General Hospital Kurigram	Kurigram	2019	February	210	178	238	150	135	253		328	60	45
45	Rangpur	100 Bed Sadar Hospital Lalmonirhat	Lalmonirhat	2019	February	269	102	251	120	264	107		280	91
46	Rangpur	Adunik Sadar Hospital Nilphamari	Nilphamari	2019	February	290	302	341	251	200	392	21	592
47	Rangpur	Civil Surgeon Office Rangpur	Rangpur	2019	February	215	178	200	193	128	265		377	16	40
48	Rangpur	Sadar Hospital Panchagarh	Panchagarh	2019	February	72	119	90	101	61	130	0	182	9	0	0
49	Rangpur	Adhunik Sadar Hospital Thakurgaon	Thakurgaon	2019	February	230	138	231	137	95	273	7	349	12	16	0
50	Rajshahi	Rajshahi Medcial College Hospital	Rajshahi	2019	February	481	223			241	463	231	231	242	250
51	Rajshahi	Sadar Hospital Chapinawabganj	Nawabganj	2019	February	58	20			32	46	14	60	4
52	Rajshahi	250 Bed General Hospital Pabna	Pabna	2019	February	329	162	391	100	137	354	0	480	11	4
53	Rajshahi	250 Bed Mohammad Ali Zila Hospital Bogra	Bogra	2019	February	544	499	423	620	330	713		801	243	201
54	Rajshahi	Adhunik Zila Hospital Joypurhat	Joypurhat	2019	February	1089	476	894	671	973	592	257	689	619	0	0
55	Rajshahi	100 Bed Zila Sadar Hospital Naogaon	Naogaon	2019	February	166	54	135	85	100	120	0	200	20	15	0
56	Rajshahi	Adhunik Sadar Hospital Natore	Natore	2019	February	309	108	270	147	147	270	0	415	2	4	0
57	Rajshahi	General Hospital Sirajganj	Sirajganj	2019	February	17	5	16	6	7	15			22	42
58	Khulna	General Hospital Khulna	Khulna	2019	February	365	269	385	249	216	418		634
59	Khulna	Sadar Hospital Bagerhat	Bagerhat	2019	February	118	147	122	143	84	181	0	262	3	3	0
60	Khulna	Sadar Hospital Cuadanga	Chuadanga	2019	February	328	85	303	110	136	276	0	215	198	13	0
61	Khulna	250 Bed General Hospital Jessore	Jessore	2019	February	37	50	50	37	39	48	0	78	9	0	0
62	Khulna	Sadar Hospital Jhenaidah	Jhenaidah	2019	February	212	77	113	176	84	205	0	289	0	0	0
63	Khulna	250 Bed General Hospital Kustia	Kushtia	2019	February	223	120	210	133	191	151	220	98	25	0	0
64	Khulna	250 Bed General Hospital Magura	Magura	2019	February	132	104	131	105	64	172	2	142	92	5
65	Khulna	250 Bed General Hospital Meherpur	Meherpur	2019	February	180	55	60	175	150	85	0	228	7
66	Khulna	Sadar Hospital Narail	Narail	2019	February	91	36	75	52	52	86	0	100	27	0	0
67	Khulna	Sadar Hospital Satkhira	Satkhira	2019	February	424	66	230	260	160	330		464	26	26
68	Khulna	moniram	Jessore	2019	February	18	3	14	7	5	16	0	21	0	0	0
1	Dhaka	Infectious Disease Hospital (IDH)	Dhaka	2019	March	4881	1755	4651	1985	1513	5123		4086	2550		5
2	Dhaka	Civil Surgeon Office, Gopalganj	Gopalganj	2019	March	253	167	220	200	166	254	20	283	117	264
3	Dhaka	Shaheed Tajuddin Ahmed Medical College Hospital Gazipur	Gazipur	2019	March	1557	654			1000	1211
4	Dhaka	250 Bed General Hospital Kishoreganj	Kishoreganj	2019	March	546	251	367	330	288	409	0	637	60	102	0
5	Dhaka	Sadar Hospital Madaripur	Madaripur	2019	March	246	314	210	350	165	395	0	297	263	0	0
6	Dhaka	250 Bed General Hospital Manikganj	Manikganj	2019	March	1976	917	1716	1177	1032	1861	12	2238	643	0	0
7	Dhaka	250 Bed General Hospital Tangail	Tangail	2019	March	1641	1525	1450	1716	1351	1815		3084	82	66
8	Dhaka	Shaheed Ahsan Ullah Master General Hospital Tongi	Gazipur	2019	March	288	72	195	165	150	210		349	11
9	Dhaka	Kurmitola General Hospital Kurmitola Dhaka	Dhaka	2019	March	41	36	60	16	30	46	30	30	16
10	Dhaka	Sadar Hospital Shariatpur	Shariatpur	2019	March	145	198	145	223	175	193	40	291	12	11	0
11	Dhaka	Sadar Hospital Narsingdi	Narshingdi	2019	March	255	80	158	187	133	202	0	171	164	18	0
12	Dhaka	Civil Surgeon Office Faridpur	Faridpur	2019	March	196	141	203	134	85	252	0	315	22	34	0
13	Dhaka	General Hospital Munshiganj	Munshiganj	2019	March	122	113	125	110	131	104	0	206	29	28
14	Dhaka	General Hospital Narayanganj	Narayanganj	2019	March	423	232	300	123						62
15	Dhaka	Sadar Hospital Rajbari	Rajbari	2019	March	82	137	144	75	95	124	2	212	5	11
16	Mymensing	Mymesing Medical College hospital Mymensing	Mymensingh	2019	March	597	297	455	439	234	660	709	185	0	0	0
17	Mymensing	Adhunik Sadar Hospital Netrokona	Netrakona	2019	March	232	170	202	200	180	222	0	402	0	0	0
18	Mymensing	Zila Hospital Sherpur	Sherpur	2019	March	159	246	250	155	150	255	65	330	10	0	0
19	Mymensing	250 Bed General Hospital Jamalpur	Jamalpur	2019	March	215	297	312	200	350	162		480	32	25	0
20	Chittagong	250 Bed Zila Sadar Hospital Brahmanbaria	Brahamanbaria	2019	March	295	45	241	91	189	151	0	308	32	32	0
21	Chittagong	250 Bed General Hospital Chandpur	Chandpur	2019	March	118	47	99	66	65	100		133	32	42
22	Chittagong	BITID Chittagong	Chittagong	2019	March	182	59	141	99	94	146		136	104		1
23	Chittagong	General Hospital Comilla	Comilla	2019	March	146	22	100	68	49	119		160	8	8
24	Chittagong	250 Bed General Hospital Cox’s Bazar	Cox'S Bazar	2019	March	195	55	160	90	126	124	10	230	10	10
25	Chittagong	250 Bed General Hospital Feni	Feni	2019	March	115	45	70	90	90	70	-	135	25	25	0
26	Chittagong	Adhunik General Hospital Khagrachari Hilly Zila Khagrachari	Khagrachhari	2019	March	96	12	87	21	20	88		71	37	37
27	Chittagong	Sadar Hospital Lakshmipur	Lakshmipur	2019	March
28	Chittagong	250 Bed General Hospital Noakhali	Noakhali	2019	March	212	63	145	130	106	169	18	111	164
29	Chittagong	General Hospital Rangamati	Rangamati	2019	March	102	19	85	45	28	103	33	98	0	0	0
30	Chittagong	250 Bed General Hospital Chittagong	Chittagong	2019	March	378	156	372	162	194	340		221	313	489
31	Chittagong	Civil Surgeon Office Bandarban Hilly Zila Bandarban	Bandarban	2019	March	173	52	196	29	98	127	146	47	32	46	0
32	Sylhet	Sylhet Shaheed Shamsuddin Ahmed Hospital Sylhet	Sylhet	2019	March	112	78	113	77	72	118	0	190	0	0
33	Sylhet	Adhunik Zila Sadar Hospital Habiganj	Habiganj	2019	March	88	40	89	39	45	83	0	115	13	0	0
34	Sylhet	250 Bed Zila Sadar Hospital Sunamganj	Sunamganj	2019	March	56	135	117	74	72	119	1	144	46	0	0
35	Sylhet	250 Bed Zila Sadar Hospital Moulvibazar	Maulvibazar	2019	March	115	65	100	80	70	110	0	160	20	180	0
36	Barisal	100 Bed Zila Sadar Hospital Barguna	Barguna	2019	March	190	190	130	250	100	180	40	300	40	40
37	Barisal	General Hospital Barisal	Barisal	2019	March	298	302	354	246	209	391		587	13	15
38	Barisal	Sdar Hospital Jhalokahti	Jhalokati	2019	March	115	207	122	200	152	170		266	56	27
39	Barisal	250 Bed Hospital patuakhali	Patuakhali	2019	March	108	151	109	150	125	134		253	6	12	0
40	Barisal	Sadar Hospital Pirojpur	Pirojpur	2019	March	148	265	191	222	136	277	0	407	6	11
41	Barisal	Sadar Hospital Bhola	Bhola	2019	March	80	125	78	127	55	150	2	203	0	0	0
42	Rangpur	250 Bed Zila Sadar Hospital Dinajpur	Dinajpur	2019	March	257	247	226	278	151	353	14	448	56
43	Rangpur	Zila Sdar Hopital Gaibandha	Gaibandha	2019	March	455	922	800	577	800	577	100	1197	90		0
44	Rangpur	General Hospital Kurigram	Kurigram	2019	March	50	120	92	78	90	80		135	35	15
45	Rangpur	100 Bed Sadar Hospital Lalmonirhat	Lalmonirhat	2019	March	254	116	265	105	80	290		267	103
46	Rangpur	Adunik Sadar Hospital Nilphamari	Nilphamari	2019	March	294	392	377	309	211	475	13	686
47	Rangpur	Civil Surgeon Office Rangpur	Rangpur	2019	March	197	210	160	207	126	281		366	41	62
48	Rangpur	Sadar Hospital Panchagarh	Panchagarh	2019	March	91	146	100	137	79	158	0	225	11	0	0
49	Rangpur	Adhunik Sadar Hospital Thakurgaon	Thakurgaon	2019	March	228	184	259	153	107	305	6	383	23	20	0
50	Rajshahi	Rajshahi Medcial College Hospital	Rajshahi	2019	March	409	186			201	394	197	193	205	210
51	Rajshahi	Sadar Hospital Chapinawabganj	Nawabganj	2019	March	68	72			60	80	40	45	15
52	Rajshahi	250 Bed General Hospital Pabna	Pabna	2019	March	183	123	206	100	87	219	0	302	4	1
53	Rajshahi	250 Bed Mohammad Ali Zila Hospital Bogra	Bogra	2019	March	391	583	526	448	324	650		770	203	164
54	Rajshahi	Adhunik Zila Hospital Joypurhat	Joypurhat	2019	March	549	210	379	380	265	494	97	271	391	0	0
55	Rajshahi	100 Bed Zila Sadar Hospital Naogaon	Naogaon	2019	March	205	79	75	51	55	71	0	62	25	18	0
56	Rajshahi	Adhunik Sadar Hospital Natore	Natore	2019	March	271	120	226	165	165	226	0	389	2	4	0
57	Rajshahi	General Hospital Sirajganj	Sirajganj	2019	March	39	17	37	19	14	42			56	107
58	Khulna	General Hospital Khulna	Khulna	2019	March	309	302	350	261	210	401		609	2	2
59	Khulna	Sadar Hospital Bagerhat	Bagerhat	2019	March	93	186	36	243	101	178	0	279	0	0	0
60	Khulna	Sadar Hospital Cuadanga	Chuadanga	2019	March	370	106	332	144	144	332	0	256	220	11	0
61	Khulna	250 Bed General Hospital Jessore	Jessore	2019	March	50	70	74	46	57	63	0	113	7	0	0
62	Khulna	Sadar Hospital Jhenaidah	Jhenaidah	2019	March	200	76	117	159	67	209	0	276	0	0	0
63	Khulna	250 Bed General Hospital Kustia	Kushtia	2019	March	254	127	269	112	189	218	191	170	20	0	0
64	Khulna	250 Bed General Hospital Magura	Magura	2019	March	159	109	151	117	74	194	6	164	98	10
65	Khulna	250 Bed General Hospital Meherpur	Meherpur	2019	March	151	53	100	104	154	50	0	294	10
66	Khulna	Sadar Hospital Narail	Narail	2019	March	107	40	94	46	49	98	0	142	5	0	0
67	Khulna	Sadar Hospital Satkhira	Satkhira	2019	March	359	75	210	224	144	290		416	18	18
68	Khulna	moniram	Jessore	2019	March	17	5	12	10	10	12	0	22	0	0	0
1	Dhaka	Infectious Disease Hospital (IDH)	Dhaka	2019	April	4429	1734	5025	1138	1826	4337		3732	2431		2
2	Dhaka	Civil Surgeon Office, Gopalganj	Gopalganj	2019	April	138	155	190	103	99	194	2	140	151	292
3	Dhaka	Shaheed Tajuddin Ahmed Medical College Hospital Gazipur	Gazipur	2019	April	300	216			116	400		480	20
4	Dhaka	250 Bed General Hospital Kishoreganj	Kishoreganj	2019	April	363	252	315	300	250	365	0	563	52	96	0
5	Dhaka	Sadar Hospital Madaripur	Madaripur	2019	April	177	248	190	235	165	260	0	226	199	0	0
6	Dhaka	250 Bed General Hospital Manikganj	Manikganj	2019	April	1695	724	1320	1099	892	1527	18	1838	563	0	0
7	Dhaka	250 Bed General Hospital Tangail	Tangail	2019	April	1389	1459	1328	1520	812	2036		2729	104	97
8	Dhaka	Shaheed Ahsan Ullah Master General Hospital Tongi	Gazipur	2019	April	335	147	287	195	143	339		465	17
9	Dhaka	Kurmitola General Hospital Kurmitola Dhaka	Dhaka	2019	April	27	18	35	10	14	31	18	20	5	3
10	Dhaka	Sadar Hospital Shariatpur	Shariatpur	2019	April	124	197	155	166	165	156	45	245	30	8	0
11	Dhaka	Sadar Hospital Narsingdi	Narshingdi	2019	April	243	47	118	212	142	188	0	149	181	9	0
12	Dhaka	Civil Surgeon Office Faridpur	Faridpur	2019	April	135	95	138	92	58	172	0	220	10	15	0
13	Dhaka	General Hospital Munshiganj	Munshiganj	2019	April	131	119	142	108	137	113	0	217	33	31
14	Dhaka	General Hospital Narayanganj	Narayanganj	2019	April	432	155	300	132						122
15	Dhaka	Sadar Hospital Rajbari	Rajbari	2019	April	45	56	55	46	155	46	3	99	2	4
16	Mymensing	Mymesing Medical College hospital Mymensing	Mymensingh	2019	April	439	447	511	375	182	704	0	637	249	0	0
17	Mymensing	Adhunik Sadar Hospital Netrokona	Netrakona	2019	April	210	150	175	185	170	190	0	319	41	7	0
18	Mymensing	Zila Hospital Sherpur	Sherpur	2019	April	139	236	219	156	145	230	45	323	7	0	0
19	Mymensing	250 Bed General Hospital Jamalpur	Jamalpur	2019	April	83	119	122	80	150	52		180	22	20	0
20	Chittagong	250 Bed Zila Sadar Hospital Brahmanbaria	Brahamanbaria	2019	April	170	30	125	95	140	60	0	191	9	9	0
21	Chittagong	250 Bed General Hospital Chandpur	Chandpur	2019	April	92	65	68	89	74	83		126	31	58
22	Chittagong	BITID Chittagong	Chittagong	2019	April	186	49	136	99	95	140		123	112		4
23	Chittagong	General Hospital Comilla	Comilla	2019	April	98	27	70	55	41	84		110	15	15
24	Chittagong	250 Bed General Hospital Cox’s Bazar	Cox'S Bazar	2019	April	237	42	178	99	150	129	9	259	11	11
25	Chittagong	250 Bed General Hospital Feni	Feni	2019	April	244	21	150	115	165	100	-	242	23	23	0
26	Chittagong	Adhunik General Hospital Khagrachari Hilly Zila Khagrachari	Khagrachhari	2019	April	103	11	73	41	32	82		86	28	28
27	Chittagong	Sadar Hospital Lakshmipur	Lakshmipur	2019	April	72	48	65	55	65	55		108	12
28	Chittagong	250 Bed General Hospital Noakhali	Noakhali	2019	April	270	52	173	149	150	172	27	129	193
29	Chittagong	General Hospital Rangamati	Rangamati	2019	April	88	24	80	32	18	94	18	94	0	0	0
30	Chittagong	250 Bed General Hospital Chittagong	Chittagong	2019	April	393	171	412	152	260	304		307	257	465
31	Chittagong	Civil Surgeon Office Bandarban Hilly Zila Bandarban	Bandarban	2019	April	156	28	120	64	96	86	107	57	20	43	0
32	Sylhet	Sylhet Shaheed Shamsuddin Ahmed Hospital Sylhet	Sylhet	2019	April	72	86	92	66	63	95	0	158	0	0
33	Sylhet	Adhunik Zila Sadar Hospital Habiganj	Habiganj	2019	April	81	49	88	42	50	80	0	125	5	0	0
34	Sylhet	250 Bed Zila Sadar Hospital Sunamganj	Sunamganj	2019	April	40	69	79	30	39	70	0	77	32	0	0
35	Sylhet	250 Bed Zila Sadar Hospital Moulvibazar	Maulvibazar	2019	April	80	40	70	50	25	95	0	110	10	120	0
36	Barisal	100 Bed Zila Sadar Hospital Barguna	Barguna	2019	April	200	201	100	201	200	201	40	301	60	60
37	Barisal	General Hospital Barisal	Barisal	2019	April	199	331	283	247	211	319		521	9	9
38	Barisal	Sdar Hospital Jhalokahti	Jhalokati	2019	April	78	241	135	184	144	175		278	41	28
39	Barisal	250 Bed Hospital patuakhali	Patuakhali	2019	April	65	106	71	100	70	101		167	4	8	0
40	Barisal	Sadar Hospital Pirojpur	Pirojpur	2019	April	102	318	183	237	135	285	0	406	14	29
41	Barisal	Sadar Hospital Bhola	Bhola	2019	April	62	140	76	126	32	170	4	196	2	0	0
42	Rangpur	250 Bed Zila Sadar Hospital Dinajpur	Dinajpur	2019	April	258	234	197	295	137	355	16	450	42
43	Rangpur	Zila Sdar Hopital Gaibandha	Gaibandha	2019	April	589	712	900	401	1001	300	70	1231	100		0
44	Rangpur	General Hospital Kurigram	Kurigram	2019	April	192	90	125	157	140	142		240	42	20
45	Rangpur	100 Bed Sadar Hospital Lalmonirhat	Lalmonirhat	2019	April	189	158	178	169	98	249		239	108
46	Rangpur	Adunik Sadar Hospital Nilphamari	Nilphamari	2019	April	218	328	295	251	166	380	10	546
47	Rangpur	Civil Surgeon Office Rangpur	Rangpur	2019	April	156	254	239	171	139	271		353	57	78
48	Rangpur	Sadar Hospital Panchagarh	Panchagarh	2019	April	76	148	100	130	124	70	0	212	12	0	0
49	Rangpur	Adhunik Sadar Hospital Thakurgaon	Thakurgaon	2019	April	157	175	225	107	73	259	3	218	111	47	0
50	Rajshahi	Rajshahi Medcial College Hospital	Rajshahi	2019	April	317	153				164	152	159	306	160
51	Rajshahi	Sadar Hospital Chapinawabganj	Nawabganj	2019	April	50	30			30	50	62	2	50
52	Rajshahi	250 Bed General Hospital Pabna	Pabna	2019	April	35	30	40	25	12	53	0	63	2	1
53	Rajshahi	250 Bed Mohammad Ali Zila Hospital Bogra	Bogra	2019	April	326	503	409	420	233	596		644	185	183
54	Rajshahi	Adhunik Zila Hospital Joypurhat	Joypurhat	2019	April	732	281	611	402	741	272	123	359	531	0	0
55	Rajshahi	100 Bed Zila Sadar Hospital Naogaon	Naogaon	2019	April	112	71	102	81	105	78	0	137	22	16	0
56	Rajshahi	Adhunik Sadar Hospital Natore	Natore	2019	April	197	121	161	157	157	261	0	315	3	6	0
57	Rajshahi	General Hospital Sirajganj	Sirajganj	2019	April	17	6	16	7	7	16			23	43
58	Khulna	General Hospital Khulna	Khulna	2019	April	241	308	304	245	261	288		547	2	2
59	Khulna	Sadar Hospital Bagerhat	Bagerhat	2019	April	75	196	108	163	79	192	0	216	55	55	0
60	Khulna	Sadar Hospital Cuadanga	Chuadanga	2019	April	240	89	226	103	119	210	7	191	138	14	0
61	Khulna	250 Bed General Hospital Jessore	Jessore	2019	April	222	150	61	59	155	217	0	361	11	0	0
62	Khulna	Sadar Hospital Jhenaidah	Jhenaidah	2019	April	184	78	105	157	54	208	0	262	0	0	0
63	Khulna	250 Bed General Hospital Kustia	Kushtia	2019	April	192	169	251	110	195	166	140	180	41	0	0
64	Khulna	250 Bed General Hospital Magura	Magura	2019	April	138	104	132	110	75	167	12	137	93	6
65	Khulna	250 Bed General Hospital Meherpur	Meherpur	2019	April	110	34	39	105	100	44	0	124	20
66	Khulna	Sadar Hospital Narail	Narail	2019	April	106	36	79	68	48	99	0	144	3	0	0
67	Khulna	Sadar Hospital Satkhira	Satkhira	2019	April	355	75	220	210	130	300		408	22	22
68	Khulna	moniram	Jessore	2019	April	35	10	25	20	11	34	0	45	0	0	0
1	Dhaka	Infectious Disease Hospital (IDH)	Dhaka	2019	May	3920	1605	4685	840	1654	3867		3170	2355		4
2	Dhaka	Civil Surgeon Office, Gopalganj	Gopalganj	2019	May	95	161	156	100	83	172	7	145	103	228
3	Dhaka	Shaheed Tajuddin Ahmed Medical College Hospital Gazipur	Gazipur	2019	May	366	158			194	300		453	25
4	Dhaka	250 Bed General Hospital Kishoreganj	Kishoreganj	2019	May	320	235	305	250	243	312	0	508	47	84	0
5	Dhaka	Sadar Hospital Madaripur	Madaripur	2019	May	155	210	161	204	124	241	0	215	150	0	0
6	Dhaka	250 Bed General Hospital Manikganj	Manikganj	2019	May	1652	832	1345	1139	920	1564	12	1876	596	0	0
7	Dhaka	250 Bed General Hospital Tangail	Tangail	2019	May	1162	1269	1351	1080	793	1638		2344	87	85
8	Dhaka	Shaheed Ahsan Ullah Master General Hospital Tongi	Gazipur	2019	May	259	150	275	134	126	283		397	12
9	Dhaka	Kurmitola General Hospital Kurmitola Dhaka	Dhaka	2019	May	16	29	34	11	18	27	20	20	5
10	Dhaka	Sadar Hospital Shariatpur	Shariatpur	2019	May	105	180	130	155	165	120	50	225	30	19	0
11	Dhaka	Sadar Hospital Narsingdi	Narshingdi	2019	May	176	89	114	151	110	165	0	170	95	23	0
12	Dhaka	Civil Surgeon Office Faridpur	Faridpur	2019	May	133	108	145	96	60	181	0	229	12	18	0
13	Dhaka	General Hospital Munshiganj	Munshiganj	2019	May	106	99	115	90	105	100	0	190	15	15
14	Dhaka	General Hospital Narayanganj	Narayanganj	2019	May	402	128	300	102						154
15	Dhaka	Sadar Hospital Rajbari	Rajbari	2019	May	105	171	135	111	109	187	7	269	8	12
16	Mymensing	Mymesing Medical College hospital Mymensing	Mymensingh	2019	May	394	404	387	411	302	496	0	521	277	0	0
17	Mymensing	Adhunik Sadar Hospital Netrokona	Netrakona	2019	May	184	156	201	139	180	160	0	325	15	5	0
18	Mymensing	Zila Hospital Sherpur	Sherpur	2019	May	75	181	166	90	94	162	37	214	5	0	0
19	Mymensing	250 Bed General Hospital Jamalpur	Jamalpur	2019	May	128	182	210	100	180	130		290	20	15	0
20	Chittagong	250 Bed Zila Sadar Hospital Brahmanbaria	Brahamanbaria	2019	May	262	50	212	100	200	112	0	291	21	21	0
21	Chittagong	250 Bed General Hospital Chandpur	Chandpur	2019	May	91	56	73	74	67	80		120	27	42
22	Chittagong	BITID Chittagong	Chittagong	2019	May	136	67	115	88	70	133		119	84
23	Chittagong	General Hospital Comilla	Comilla	2019	May	106	24	75	55	43	87		117	13	13
24	Chittagong	250 Bed General Hospital Cox’s Bazar	Cox'S Bazar	2019	May	160	95	155	150	161	94	11	229	15	15
25	Chittagong	250 Bed General Hospital Feni	Feni	2019	May	100	25	50	65	75	50	-	105	20	20	0
26	Chittagong	Adhunik General Hospital Khagrachari Hilly Zila Khagrachari	Khagrachhari	2019	May	121	19	107	33	28	29		92	48	48
27	Chittagong	Sadar Hospital Lakshmipur	Lakshmipur	2019	May	184	112	160	136	151	146		271	25
28	Chittagong	250 Bed General Hospital Noakhali	Noakhali	2019	May	188	57	129	116	98	147	14	113	132
29	Chittagong	General Hospital Rangamati	Rangamati	2019	May	81	19	72	28	20	80	12	88	0	0	0
30	Chittagong	250 Bed General Hospital Chittagong	Chittagong	2019	May	360	175	375	160	191	344		256	279	466
31	Chittagong	Civil Surgeon Office Bandarban Hilly Zila Bandarban	Bandarban	2019	May	124	52	120	59	60	116	101	46	29	35	0
32	Sylhet	Sylhet Shaheed Shamsuddin Ahmed Hospital Sylhet	Sylhet	2019	May	75	63	85	53	47	90	0	138	0	0
33	Sylhet	Adhunik Zila Sadar Hospital Habiganj	Habiganj	2019	May	72	51	63	67	31	99	0	123	7	0	0
34	Sylhet	250 Bed Zila Sadar Hospital Sunamganj	Sunamganj	2019	May	45	56	55	46	32	69	0	72	29	0	0
35	Sylhet	250 Bed Zila Sadar Hospital Moulvibazar	Maulvibazar	2019	May	90	30	65	55	15	115	0	105	15	120	0
36	Barisal	100 Bed Zila Sadar Hospital Barguna	Barguna	2019	May	160	162	122	200	140	182	22	250	50	50
37	Barisal	General Hospital Barisal	Barisal	2019	May	129	343	226	246	157	315		467	5	5
38	Barisal	Sdar Hospital Jhalokahti	Jhalokati	2019	May	60	213	135	138	131	142		238	35	18
39	Barisal	250 Bed Hospital patuakhali	Patuakhali	2019	May	57	107	60	104	80	84		159	5	10	0
40	Barisal	Sadar Hospital Pirojpur	Pirojpur	2019	May	68	196	117	147	86	178	0	264	0	0
41	Barisal	Sadar Hospital Bhola	Bhola	2019	May	62	90	44	108	62	90	3	149	0	0	0
42	Rangpur	250 Bed Zila Sadar Hospital Dinajpur	Dinajpur	2019	May	227	213	176	264	125	315	14	403	37
43	Rangpur	Zila Sdar Hopital Gaibandha	Gaibandha	2019	May	454	578	900	103	800	232	20	932	80		0
44	Rangpur	General Hospital Kurigram	Kurigram	2019	May	63	70	63	70	52	81		113	20	15
45	Rangpur	100 Bed Sadar Hospital Lalmonirhat	Lalmonirhat	2019	May	200	330	230	100	130	200		219	111
46	Rangpur	Adunik Sadar Hospital Nilphamari	Nilphamari	2019	May	230	293	284	239	170	353	9	523
47	Rangpur	Civil Surgeon Office Rangpur	Rangpur	2019	May	139	156	98	197	77	218		242	53	53
48	Rangpur	Sadar Hospital Panchagarh	Panchagarh	2019	May	49	98	110	137	49	98	0	137	10	0	0
49	Rangpur	Adhunik Sadar Hospital Thakurgaon	Thakurgaon	2019	May	128	137	179	86	57	208	7	143	115	48	0
50	Rajshahi	Rajshahi Medcial College Hospital	Rajshahi	2019	May	237	114			119	232	117	109	125	127
51	Rajshahi	Sadar Hospital Chapinawabganj	Nawabganj	2019	May	24	10			34	14	5	25	4
52	Rajshahi	250 Bed General Hospital Pabna	Pabna	2019	May	102	174	176	100	103	173	0	258	18	5
53	Rajshahi	250 Bed Mohammad Ali Zila Hospital Bogra	Bogra	2019	May	313	444	377	380	208	549		381	374	189
54	Rajshahi	Adhunik Zila Hospital Joypurhat	Joypurhat	2019	May	650	500	700	450	789	361	380	575	195	0	0
55	Rajshahi	100 Bed Zila Sadar Hospital Naogaon	Naogaon	2019	May	113	53	90	76	90	76	0	140	12	12	0
56	Rajshahi	Adhunik Sadar Hospital Natore	Natore	2019	May	169	129	159	129	129	259	0	285	3	6	0
57	Rajshahi	General Hospital Sirajganj	Sirajganj	2019	May	20	7	19	8	8	19			27	49
58	Khulna	General Hospital Khulna	Khulna	2019	May	181	287	268	200	145	323		463	5	5
59	Khulna	Sadar Hospital Bagerhat	Bagerhat	2019	May	57	174	93	138	69	162	0	169	62	62	0
60	Khulna	Sadar Hospital Cuadanga	Chuadanga	2019	May	229	84	233	72	110	195	0	190	115	29	0
61	Khulna	250 Bed General Hospital Jessore	Jessore	2019	May	205	390	392	203	288	307	0	553	42	0	0
62	Khulna	Sadar Hospital Jhenaidah	Jhenaidah	2019	May	127	65	89	103	51	141	0	154	0	0	0
63	Khulna	250 Bed General Hospital Kustia	Kushtia	2019	May	189	148	192	145	222	125	149	140	48	0	0
64	Khulna	250 Bed General Hospital Magura	Magura	2019	May	98	110	103	95	61	147	6	129	73	8
65	Khulna	250 Bed General Hospital Meherpur	Meherpur	2019	May	106	34	34	106	90	46	0	113	23
66	Khulna	Sadar Hospital Narail	Narail	2019	May	87	24	74	35	34	77	0	109	2	0	0
67	Khulna	Sadar Hospital Satkhira	Satkhira	2019	May	149	75	110	114	87	137		206	18	18
68	Khulna	moniram	Jessore	2019	May	18	4	9	13	10	12	0	22	0	0	0
1	Dhaka	Infectious Disease Hospital (IDH)	Dhaka	2019	June	3387	1755	4123	1019	1058	4088		3150	1992		7
2	Dhaka	Civil Surgeon Office, Gopalganj	Gopalganj	2019	June	60	105	100	65	60	105	0	146	103	228
3	Dhaka	Shaheed Tajuddin Ahmed Medical College Hospital Gazipur	Gazipur	2019	June	300	200			150	350		428	8
4	Dhaka	250 Bed General Hospital Kishoreganj	Kishoreganj	2019	June	329	187	282	234	150	366	0	482	34	63	0
5	Dhaka	Sadar Hospital Madaripur	Madaripur	2019	June	130	215	157	188	136	209	0	205	140	0	0
6	Dhaka	250 Bed General Hospital Manikganj	Manikganj	2019	June	1587	573	1166	994	828	1332	13	1463	684	0	0
7	Dhaka	250 Bed General Hospital Tangail	Tangail	2019	June	1023	934	1235	722	654	1303		1897	60	55
8	Dhaka	Shaheed Ahsan Ullah Master General Hospital Tongi	Gazipur	2019	June	258	132	300	90	143	247		380	10
9	Dhaka	Kurmitola General Hospital Kurmitola Dhaka	Dhaka	2019	June	33	27	38	22	25	35	22	28	10	3
10	Dhaka	Sadar Hospital Shariatpur	Shariatpur	2019	June	160	180	120	220	170	170	54	265	25	12	0
11	Dhaka	Sadar Hospital Narsingdi	Narshingdi	2019	June	175	90	109	156	114	151	0	169	96	15	0
12	Dhaka	Civil Surgeon Office Faridpur	Faridpur	2019	June	107	103	126	84	53	157	0	185	25	25	0
13	Dhaka	General Hospital Munshiganj	Munshiganj	2019	June	141	89	120	110	128	102	0	197	33	31
14	Dhaka	General Hospital Narayanganj	Narayanganj	2019	June	326	121	200	126						96
15	Dhaka	Sadar Hospital Rajbari	Rajbari	2019	June	75	156	131	90	101	120	5	216	5	4
16	Mymensing	Mymesing Medical College hospital Mymensing	Mymensingh	2019	June	357	375	416	316	187	545	0	534	198	0	0
17	Mymensing	Adhunik Sadar Hospital Netrokona	Netrakona	2019	June	158	157	175	140	157	158	0	305	10	4	0
18	Mymensing	Zila Hospital Sherpur	Sherpur	2019	June	96	166	190	72	98	164	40	219	3	0	0
19	Mymensing	250 Bed General Hospital Jamalpur	Jamalpur	2019	June	85	140	125	100	125	100		210	15	15	0
20	Chittagong	250 Bed Zila Sadar Hospital Brahmanbaria	Brahamanbaria	2019	June	137	23	105	55	97	65	0	155	6	6	0
21	Chittagong	250 Bed General Hospital Chandpur	Chandpur	2019	June	93	77	87	83	69	101		146	24	38
22	Chittagong	BITID Chittagong	Chittagong	2019	June	149	69	139	79	98	120		111	107		1
23	Chittagong	General Hospital Comilla	Comilla	2019	June	183	28	121	90	66	145		159	52	52
24	Chittagong	250 Bed General Hospital Cox’s Bazar	Cox'S Bazar	2019	June	216	127	209	134	230	113	18	310	15	15
25	Chittagong	250 Bed General Hospital Feni	Feni	2019	June	160	30	100	90	100	90	-	170	20	20	0
26	Chittagong	Adhunik General Hospital Khagrachari Hilly Zila Khagrachari	Khagrachhari	2019	June	111	9	92	28	29	92		71	39	39
27	Chittagong	Sadar Hospital Lakshmipur	Lakshmipur	2019	June	117	73	100	90	73	117		170	20
28	Chittagong	250 Bed General Hospital Noakhali	Noakhali	2019	June	160	72	124	108	98	134	12	94	138
29	Chittagong	General Hospital Rangamati	Rangamati	2019	June	82	30	61	43	25	97	20	92	0	0	0
30	Chittagong	250 Bed General Hospital Chittagong	Chittagong	2019	June	387	184	404	167	265	306		320	251	502
31	Chittagong	Civil Surgeon Office Bandarban Hilly Zila Bandarban	Bandarban	2019	June	44	44	59	29	46	42	41	19	28	28	0
32	Sylhet	Sylhet Shaheed Shamsuddin Ahmed Hospital Sylhet	Sylhet	2019	June	0	0	0	0	0	0	0	0	0	0
33	Sylhet	Adhunik Zila Sadar Hospital Habiganj	Habiganj	2019	June	58	29	64	66	29	101	0	112	18	0	0
34	Sylhet	250 Bed Zila Sadar Hospital Sunamganj	Sunamganj	2019	June	31	57	42	46	32	56	1	58	29	0	0
35	Sylhet	250 Bed Zila Sadar Hospital Moulvibazar	Maulvibazar	2019	June	90	40	80	50	40	90	0	120	10	130	0
36	Barisal	100 Bed Zila Sadar Hospital Barguna	Barguna	2019	June	170	278	148	200	150	198	48	260	40	40
37	Barisal	General Hospital Barisal	Barisal	2019	June	137	355	243	249	147	345		485	7	6
38	Barisal	Sdar Hospital Jhalokahti	Jhalokati	2019	June	55	251	113	193	149	157		277	29	15
39	Barisal	250 Bed Hospital patuakhali	Patuakhali	2019	June	27	105	60	72	60	72		129	3	6	0
40	Barisal	Sadar Hospital Pirojpur	Pirojpur	2019	June	64	230	123	171	97	197	0	285	9	20
41	Barisal	Sadar Hospital Bhola	Bhola	2019	June	60	121	51	130	56	125	1	179	1	0	0
42	Rangpur	250 Bed Zila Sadar Hospital Dinajpur	Dinajpur	2019	June	186	205	185	206	119	272	12	361	30
43	Rangpur	Zila Sdar Hopital Gaibandha	Gaibandha	2019	June	400	456	500	356	500	356	10	826	30		0
44	Rangpur	General Hospital Kurigram	Kurigram	2019	June	140	122	136	127	107	155		212	50	35
45	Rangpur	100 Bed Sadar Hospital Lalmonirhat	Lalmonirhat	2019	June	158	127	180	105	70	215		208	77
46	Rangpur	Adunik Sadar Hospital Nilphamari	Nilphamari	2019	June	180	312	245	247	162	330	14	492
47	Rangpur	Civil Surgeon Office Rangpur	Rangpur	2019	June	124	194	171	148	84	235		268	51	49
48	Rangpur	Sadar Hospital Panchagarh	Panchagarh	2019	June	57	146	100	103	67	136	0	194	9	0	0
49	Rangpur	Adhunik Sadar Hospital Thakurgaon	Thakurgaon	2019	June	124	176	173	127	127	173	11	194	95	64	0
50	Rajshahi	Rajshahi Medcial College Hospital	Rajshahi	2019	June	185	86			89	182	87	91	93	95
51	Rajshahi	Sadar Hospital Chapinawabganj	Nawabganj	2019	June	34	26			25	35	17	40	3
52	Rajshahi	250 Bed General Hospital Pabna	Pabna	2019	June	130	119	182	67	122	127	0	232	17	5
53	Rajshahi	250 Bed Mohammad Ali Zila Hospital Bogra	Bogra	2019	June	286	546	398	434	262	570		650	182	196
54	Rajshahi	Adhunik Zila Hospital Joypurhat	Joypurhat	2019	June	860	530	900	490	700	690	525	700	165	0	0
55	Rajshahi	100 Bed Zila Sadar Hospital Naogaon	Naogaon	2019	June	94	59	82	71	82	71	0	141	14	14	0
56	Rajshahi	Adhunik Sadar Hospital Natore	Natore	2019	June	136	208	163	181	181	263	0	342	2	4	0
57	Rajshahi	General Hospital Sirajganj	Sirajganj	2019	June	26	6	25	7	9	23			32	61
58	Khulna	General Hospital Khulna	Khulna	2019	June	162	276	238	195	232	201		429	4	4
59	Khulna	Sadar Hospital Bagerhat	Bagerhat	2019	June	33	175	74	134	59	149	0	162	46	46	0
60	Khulna	Sadar Hospital Cuadanga	Chuadanga	2019	June	195	98	239	54	94	199	2	196	97	52	0
61	Khulna	250 Bed General Hospital Jessore	Jessore	2019	June	300	332	395	237	299	333	0	599	33	0	0
62	Khulna	Sadar Hospital Jhenaidah	Jhenaidah	2019	June	137	53	80	110	41	149	0	190	0	0	0
63	Khulna	250 Bed General Hospital Kustia	Kushtia	2019	June	213	143	196	160	214	142	160	135	61	0	0
64	Khulna	250 Bed General Hospital Magura	Magura	2019	June	97	94	93	98	75	116	2	98	91	21
65	Khulna	250 Bed General Hospital Meherpur	Meherpur	2019	June	97	58	58	97	100	55	0	134	21
66	Khulna	Sadar Hospital Narail	Narail	2019	June	86	39	65	60	36	88		122	13	0	0
67	Khulna	Sadar Hospital Satkhira	Satkhira	2019	June	207	53	120	140	75	185		248	12	12
68	Khulna	moniram	Jessore	2019	June	9	0	5	4	4	5	0	9	0	0	0
1	Dhaka	Infectious Disease Hospital (IDH)	Dhaka	2019	July	3701	1752	4465	988	1125	4328		3375	2078		6
2	Dhaka	Civil Surgeon Office, Gopalganj	Gopalganj	2019	July	69	120	100	89	61	128	3	140	46	8
3	Dhaka	Shaheed Tajuddin Ahmed Medical College Hospital Gazipur	Gazipur	2019	July	365	172			237	300		540	7
4	Dhaka	250 Bed General Hospital Kishoreganj	Kishoreganj	2019	July	383	214	307	290	230	367	0	587	50	93	0
5	Dhaka	Sadar Hospital Madaripur	Madaripur	2019	July	201	199	191	209	165	235	0	250	150	0	0
6	Dhaka	250 Bed General Hospital Manikganj	Manikganj	2019	July	1480	760	1231	1009	842	1398	15	1655	570	0	0
7	Dhaka	250 Bed General Hospital Tangail	Tangail	2019	July	966	1294	1197	1063	496	1764		2194	66	65
8	Dhaka	Shaheed Ahsan Ullah Master General Hospital Tongi	Gazipur	2019	July	120	85	127	78	75	130		197	8
9	Dhaka	Kurmitola General Hospital Kurmitola Dhaka	Dhaka	2019	July	28	17	29	16	11	34	28	13	4	1
10	Dhaka	Sadar Hospital Shariatpur	Shariatpur	2019	July	75	251	158	168	165	161	53	257	15	24	0
11	Dhaka	Sadar Hospital Narsingdi	Narshingdi	2019	July	224	81	124	181	105	200	0	185	120	14	0
12	Dhaka	Civil Surgeon Office Faridpur	Faridpur	2019	July	79	51	78	52	33	97	0	110	20	31	0
13	Dhaka	General Hospital Munshiganj	Munshiganj	2019	July	130	90	130	90	130	90	0	193	27	26
14	Dhaka	General Hospital Narayanganj	Narayanganj	2019	July	376	107	250	123						90
15	Dhaka	Sadar Hospital Rajbari	Rajbari	2019	July	75	128	125	78	80	123	6	195	8	6
16	Mymensing	Mymesing Medical College hospital Mymensing	Mymensingh	2019	July	372	438	473	337	316	494	0	686	127	0	0
17	Mymensing	Adhunik Sadar Hospital Netrokona	Netrakona	2019	July	160	145	200	105	150	155	0	303	2	1	0
18	Mymensing	Zila Hospital Sherpur	Sherpur	2019	July	110	196	206	100	98	208	45	256	5	0	0
19	Mymensing	250 Bed General Hospital Jamalpur	Jamalpur	2019	July	53	120	100	73	100	73		160	13	13	0
20	Chittagong	250 Bed Zila Sadar Hospital Brahmanbaria	Brahamanbaria	2019	July	236	56	200	92	172	120	0	285	7	7	0
21	Chittagong	250 Bed General Hospital Chandpur	Chandpur	2019	July	80	77	89	68	78	79		152	5	9
22	Chittagong	BITID Chittagong	Chittagong	2019	July	144	63	121	86	89	118		123	84
23	Chittagong	General Hospital Comilla	Comilla	2019	July	112	35	100	47	42	105		135	12	12
24	Chittagong	250 Bed General Hospital Cox’s Bazar	Cox'S Bazar	2019	July	140	193	103	106	207	129	5	322	9	9
25	Chittagong	250 Bed General Hospital Feni	Feni	2019	July	130	70	100	100	150	50	-	170	30	20	0
26	Chittagong	Adhunik General Hospital Khagrachari Hilly Zila Khagrachari	Khagrachhari	2019	July	97	11	75	31	34	63		87	19	19
27	Chittagong	Sadar Hospital Lakshmipur	Lakshmipur	2019	July	97	93	110	80	82	108		172	18
28	Chittagong	250 Bed General Hospital Noakhali	Noakhali	2019	July	61	31	51	41	38	54	9	40	52
29	Chittagong	General Hospital Rangamati	Rangamati	2019	July	80	35	77	38	23	92	17	98	0	0	0
30	Chittagong	250 Bed General Hospital Chittagong	Chittagong	2019	July	259	169	312	116	221	307		250	178	393
31	Chittagong	Civil Surgeon Office Bandarban Hilly Zila Bandarban	Bandarban	2019	July	51	38	60	29	33	56	53	20	16	25	0
32	Sylhet	Sylhet Shaheed Shamsuddin Ahmed Hospital Sylhet	Sylhet	2019	July	91	118	125	85	79	131	0	210	0	0
33	Sylhet	Adhunik Zila Sadar Hospital Habiganj	Habiganj	2019	July	47	39	62	24	26	60	0	63	23	0	0
34	Sylhet	250 Bed Zila Sadar Hospital Sunamganj	Sunamganj	2019	July	44	85	79	50	43	86	0	98	31	0	0
35	Sylhet	250 Bed Zila Sadar Hospital Moulvibazar	Maulvibazar	2019	July	85	39	50	65	25	90	0	100	15	115	0
36	Barisal	100 Bed Zila Sadar Hospital Barguna	Barguna	2019	July	156	200	150	206	150	206	35	300	25	25
37	Barisal	General Hospital Barisal	Barisal	2019	July	142	359	264	237	165	336		500	1	1
38	Barisal	Sdar Hospital Jhalokahti	Jhalokati	2019	July	42	248	94	196	121	169		229	61	10
39	Barisal	250 Bed Hospital patuakhali	Patuakhali	2019	July	43	132	85	90	75	100		172	3	6	0
40	Barisal	Sadar Hospital Pirojpur	Pirojpur	2019	July	65	252	137	180	114	203	0	300	17	30
41	Barisal	Sadar Hospital Bhola	Bhola	2019	July	75	160	75	160	75	160	5	230	0	0	0
42	Rangpur	250 Bed Zila Sadar Hospital Dinajpur	Dinajpur	2019	July	170	235	162	243	112	293	10	384	21
43	Rangpur	Zila Sdar Hopital Gaibandha	Gaibandha	2019	July	455	643	700	398	900	198	5	1053	80		0
44	Rangpur	General Hospital Kurigram	Kurigram	2019	July	162	122	126	158	145	139		164	120	80
45	Rangpur	100 Bed Sadar Hospital Lalmonirhat	Lalmonirhat	2019	July	169	123	204	88	99	193		192	100
46	Rangpur	Adunik Sadar Hospital Nilphamari	Nilphamari	2019	July	177	414	312	279	197	394	20	591
47	Rangpur	Civil Surgeon Office Rangpur	Rangpur	2019	July	160	241	220	181	90	311		351	50	74
48	Rangpur	Sadar Hospital Panchagarh	Panchagarh	2019	July	56	132	88	100	62	124	0	184	4	0	0
49	Rangpur	Adhunik Sadar Hospital Thakurgaon	Thakurgaon	2019	July	95	202	200	97	107	190	8	168	121	74	0
50	Rajshahi	Rajshahi Medcial College Hospital	Rajshahi	2019	July	206	96			302	94	101	94	107	110
51	Rajshahi	Sadar Hospital Chapinawabganj	Nawabganj	2019	July	32	35			20	47	26	33	8
52	Rajshahi	250 Bed General Hospital Pabna	Pabna	2019	July	129	153	104	178	104	178	0	271	11	3
53	Rajshahi	250 Bed Mohammad Ali Zila Hospital Bogra	Bogra	2019	July	313	531	392	452	248	596		652	193	202
54	Rajshahi	Adhunik Zila Hospital Joypurhat	Joypurhat	2019	July	1000	388	850	538	900	488	343	850	195	0	0
55	Rajshahi	100 Bed Zila Sadar Hospital Naogaon	Naogaon	2019	July	68	51	75	44	65	54	0	129	10	8	0
56	Rajshahi	Adhunik Sadar Hospital Natore	Natore	2019	July	153	114	157	110	110	257	0	264	3	6	0
57	Rajshahi	General Hospital Sirajganj	Sirajganj	2019	July	27	8	26	9	10	25			35	65
58	Khulna	General Hospital Khulna	Khulna	2019	July	181	293	260	214	157	317		470	4	4
59	Khulna	Sadar Hospital Bagerhat	Bagerhat	2019	July	48	184	92	140	75	157	0	155	77	77	0
60	Khulna	Sadar Hospital Cuadanga	Chuadanga	2019	July	209	98	249	58	104	203	0	178	129	31	0
61	Khulna	250 Bed General Hospital Jessore	Jessore	2019	July	279	425	398	306	348	356	0	27	677	0	0
62	Khulna	Sadar Hospital Jhenaidah	Jhenaidah	2019	July	106	76	62	120	46	136	0	182	0	0	0
63	Khulna	250 Bed General Hospital Kustia	Kushtia	2019	July	319	161	280	200	296	149	205	185	90	0	0
64	Khulna	250 Bed General Hospital Magura	Magura	2019	July	88	101	86	103	56	113	6	116	67	5
65	Khulna	250 Bed General Hospital Meherpur	Meherpur	2019	July	49	41	30	60	55	35	0	140	17
66	Khulna	Sadar Hospital Narail	Narail	2019	July	93	46	90	49	60	79	14	40	85	0	0
67	Khulna	Sadar Hospital Satkhira	Satkhira	2019	July	120	51	90	81	69	102		159	12	12
68	Khulna	moniram	Jessore	2019	July	3	0	2	1	2	1	0	3	0	0	0
1	Dhaka	Infectious Disease Hospital (IDH)	Dhaka	2019	August	3204	1876	3025	2055	1356	3724		3000	2080		1
2	Dhaka	Civil Surgeon Office, Gopalganj	Gopalganj	2019	August	74	142	116	100	84	132	4	142	70	76
3	Dhaka	Shaheed Tajuddin Ahmed Medical College Hospital Gazipur	Gazipur	2019	August	320	199			200	319		478	6
4	Dhaka	250 Bed General Hospital Kishoreganj	Kishoreganj	2019	August	397	252	334	315	245	404	0	604	45	75	0
5	Dhaka	Sadar Hospital Madaripur	Madaripur	2019	August	200	175	165	210	170	205	0	215	160	0	0
6	Dhaka	250 Bed General Hospital Manikganj	Manikganj	2019	August	1366	954	1782	1492	876	1444	12	1778	530	0	0
7	Dhaka	250 Bed General Hospital Tangail	Tangail	2019	August	1070	1236	1207	1099	876	1430		2236	70	66
8	Dhaka	Shaheed Ahsan Ullah Master General Hospital Tongi	Gazipur	2019	August	169	130	188	111	66	233		289	10
9	Dhaka	Kurmitola General Hospital Kurmitola Dhaka	Dhaka	2019	August	21	24	33	12	16	26	23	17	5	1
10	Dhaka	Sadar Hospital Shariatpur	Shariatpur	2019	August	88	252	162	178	165	175	53	252	15	5	0
11	Dhaka	Sadar Hospital Narsingdi	Narshingdi	2019	August	178	82	109	150	117	143	0	179	81	10	0
12	Dhaka	Civil Surgeon Office Faridpur	Faridpur	2019	August	120	46	99	67	42	124	0	126	40	58	0
13	Dhaka	General Hospital Munshiganj	Munshiganj	2019	August	128	97	132	93	122	103	0	205	20	20
14	Dhaka	General Hospital Narayanganj	Narayanganj	2019	August	364	140	220	144						78
15	Dhaka	Sadar Hospital Rajbari	Rajbari	2019	August	71	129	108	90	61	139	4	196	4	5
16	Mymensing	Mymesing Medical College hospital Mymensing	Mymensingh	2019	August	419	384	395	408	237	566	0	530	273	0	0
17	Mymensing	Adhunik Sadar Hospital Netrokona	Netrakona	2019	August	185	183	198	170	170	198	0	355	13	6	0
18	Mymensing	Zila Hospital Sherpur	Sherpur	2019	August	98	246	200	144	142	202	40	298	6	0	0
19	Mymensing	250 Bed General Hospital Jamalpur	Jamalpur	2019	August	144	357	301	200	351	150		490	11	10	0
20	Chittagong	250 Bed Zila Sadar Hospital Brahmanbaria	Brahamanbaria	2019	August	286	70	231	125	211	145	0	348	8	8	0
21	Chittagong	250 Bed General Hospital Chandpur	Chandpur	2019	August	59	82	90	51	88	53		126	15	23
22	Chittagong	BITID Chittagong	Chittagong	2019	August	140	61	147	54	75	126		111	90
23	Chittagong	General Hospital Comilla	Comilla	2019	August	125	45	104	66	56	114		159	11	11
24	Chittagong	250 Bed General Hospital Cox’s Bazar	Cox'S Bazar	2019	August	224	150	123	151	211	162	7	350	17	17
25	Chittagong	250 Bed General Hospital Feni	Feni	2019	August	112	38	75	75	100	50	-	130	20	30	0
26	Chittagong	Adhunik General Hospital Khagrachari Hilly Zila Khagrachari	Khagrachhari	2019	August	9	2	8	3	4	7		9	2	2
27	Chittagong	Sadar Hospital Lakshmipur	Lakshmipur	2019	August	88	107	115	80	82	108		172	18
28	Chittagong	250 Bed General Hospital Noakhali	Noakhali	2019	August	172	88	139	121	114	146	17	106	154
29	Chittagong	General Hospital Rangamati	Rangamati	2019	August	54	29	57	26	22	61	13	70	0	0	0
30	Chittagong	250 Bed General Hospital Chittagong	Chittagong	2019	August	330	165	387	108	165	330		264	231	398
31	Chittagong	Civil Surgeon Office Bandarban Hilly Zila Bandarban	Bandarban	2019	August	49	12	35	26	21	40	36	17	8	15	0
32	Sylhet	Sylhet Shaheed Shamsuddin Ahmed Hospital Sylhet	Sylhet	2019	August	73	104	107	70	68	109	0	177	0	0
33	Sylhet	Adhunik Zila Sadar Hospital Habiganj	Habiganj	2019	August	56	41	43	54	30	67	0	93	4	0	0
34	Sylhet	250 Bed Zila Sadar Hospital Sunamganj	Sunamganj	2019	August	66	127	100	93	60	133	0	132	61	0	0
35	Sylhet	250 Bed Zila Sadar Hospital Moulvibazar	Maulvibazar	2019	August	85	25	50	60	35	75	0	110	20	110	0
36	Barisal	100 Bed Zila Sadar Hospital Barguna	Barguna	2019	August	160	200	150	206	170	170	40	300	20	20
37	Barisal	General Hospital Barisal	Barisal	2019	August	136	419	297	258	296	259		544	11	11
38	Barisal	Sdar Hospital Jhalokahti	Jhalokati	2019	August	44	224	94	174	98	170		213	55	7
39	Barisal	250 Bed Hospital patuakhali	Patuakhali	2019	August	31	120	51	100	75	100		147	4	8	0
40	Barisal	Sadar Hospital Pirojpur	Pirojpur	2019	August	41	211	196	56	85	167	0	248	4	8
41	Barisal	Sadar Hospital Bhola	Bhola	2019	August	90	135	68	157	67	158	6	216	3	0	0
42	Rangpur	250 Bed Zila Sadar Hospital Dinajpur	Dinajpur	2019	August	208	332	240	297	128	412	7	505	35
43	Rangpur	Zila Sdar Hopital Gaibandha	Gaibandha	2019	August	726	799	1100	425	1000	525	5	1456	50		0
44	Rangpur	General Hospital Kurigram	Kurigram	2019	August	152	124	130	146	105	171		166	110	90
45	Rangpur	100 Bed Sadar Hospital Lalmonirhat	Lalmonirhat	2019	August	175	145	240	80	88	232		207	113
46	Rangpur	Adunik Sadar Hospital Nilphamari	Nilphamari	2019	August	213	401	286	328	215	399	18	614
47	Rangpur	Civil Surgeon Office Rangpur	Rangpur	2019	August	155	244	205	194	124	279		345	54	89
48	Rangpur	Sadar Hospital Panchagarh	Panchagarh	2019	August	65	158	103	120	105	118	0	212	11	0	0
49	Rangpur	Adhunik Sadar Hospital Thakurgaon	Thakurgaon	2019	August	133	148	199	82	76	205	6	196	79	67	0
50	Rajshahi	Rajshahi Medcial College Hospital	Rajshahi	2019	August	232	103			107	228	106	109	120	125
51	Rajshahi	Sadar Hospital Chapinawabganj	Nawabganj	2019	August	25	26			10	41	22	18	9
52	Rajshahi	250 Bed General Hospital Pabna	Pabna	2019	August	110	138	148	100	96	152	0	232	16	5
53	Rajshahi	250 Bed Mohammad Ali Zila Hospital Bogra	Bogra	2019	August	355	554	388	521	239	670		694	215	225
54	Rajshahi	Adhunik Zila Hospital Joypurhat	Joypurhat	2019	August	1050	360	780	630	880	530	400	520	490	0	0
55	Rajshahi	100 Bed Zila Sadar Hospital Naogaon	Naogaon	2019	August	111	63	103	71	85	89	0	151	15	7	0
56	Rajshahi	Adhunik Sadar Hospital Natore	Natore	2019	August	135	129	164	100	99	265	0	262	2	4	0
57	Rajshahi	General Hospital Sirajganj	Sirajganj	2019	August	28	9	27	10	9	28			37	67
58	Khulna	General Hospital Khulna	Khulna	2019	August	163	299	252	210	234	228		458	4	4
59	Khulna	Sadar Hospital Bagerhat	Bagerhat	2019	August	34	183	78	139	63	154	0	123	94	94	0
60	Khulna	Sadar Hospital Cuadanga	Chuadanga	2019	August	168	83	183	68	86	165	0	159	92	29	0
61	Khulna	250 Bed General Hospital Jessore	Jessore	2019	August	155	224	210	173	105	178	0	358	25	0	0
62	Khulna	Sadar Hospital Jhenaidah	Jhenaidah	2019	August	577	277	426	428	197	657	0	854	0	0	0
63	Khulna	250 Bed General Hospital Kustia	Kushtia	2019	August	207	188	225	170	271	124	210	100	85	0	0
64	Khulna	250 Bed General Hospital Magura	Magura	2019	August	120	112	132	100	71	161	7	123	102	21
65	Khulna	250 Bed General Hospital Meherpur	Meherpur	2019	August	97	60	60	97	90	67	0	82	8
66	Khulna	Sadar Hospital Narail	Narail	2019	August	77	52	68	61	41	88	15	45	69	0	0
67	Khulna	Sadar Hospital Satkhira	Satkhira	2019	August	112	98	100	110	71	139		198	12	12
68	Khulna	moniram	Jessore	2019	August	40	2	20	14	8	34	0	42	0	0	0
1	Dhaka	Infectious Disease Hospital (IDH)	Dhaka	2019	September	4103	1914	4056	1961	1153	4864		3719	2298		2
2	Dhaka	Civil Surgeon Office, Gopalganj	Gopalganj	2019	September	75	161	136	100	104	132	2	140	94	76
3	Dhaka	Shaheed Tajuddin Ahmed Medical College Hospital Gazipur	Gazipur	2019	September	320	199			200	319		478	6
4	Dhaka	250 Bed General Hospital Kishoreganj	Kishoreganj	2019	September	376	250	336	300	209	427	0	598	38	68	0
5	Dhaka	Sadar Hospital Madaripur	Madaripur	2019	September	120	207	170	157	144	183	0	202	125	0	0
6	Dhaka	250 Bed General Hospital Manikganj	Manikganj	2019	September	1287	933	1194	1026	825	1395	10	1346	864	0	0
7	Dhaka	250 Bed General Hospital Tangail	Tangail	2019	September	864	1438	1053	1249	787	1515		2053	249	143
8	Dhaka	Shaheed Ahsan Ullah Master General Hospital Tongi	Gazipur	2019	September	143	89	177	55	75	157		221	11
9	Dhaka	Kurmitola General Hospital Kurmitola Dhaka	Dhaka	2019	September	35	45	52	48	41	59	40	46	14	7
10	Dhaka	Sadar Hospital Shariatpur	Shariatpur	2019	September	75	205	165	115	150	130	44	230	25	9	0
11	Dhaka	Sadar Hospital Narsingdi	Narshingdi	2019	September	180	90	127	143	113	157	0	163	107	16	0
12	Dhaka	Civil Surgeon Office Faridpur	Faridpur	2019	September	116	57	103	70	43	130	0	118	55	83	0
13	Dhaka	General Hospital Munshiganj	Munshiganj	2019	September	140	95	130	105	125	110	0	216	19	19
14	Dhaka	General Hospital Narayanganj	Narayanganj	2019	September	410	165	300	110						150
15	Dhaka	Sadar Hospital Rajbari	Rajbari	2019	September	60	153	149	105	35	178	9	205	8	7
16	Mymensing	Mymesing Medical College hospital Mymensing	Mymensingh	2019	September	539	368	501	406	283	624	0	712	195	46	0
17	Mymensing	Adhunik Sadar Hospital Netrokona	Netrakona	2019	September	189	158	169	178	180	167	0	304	43	10	0
18	Mymensing	Zila Hospital Sherpur	Sherpur	2019	September	115	305	280	140	150	270	56	359	5	0	0
19	Mymensing	250 Bed General Hospital Jamalpur	Jamalpur	2019	September	126	227	200	153	200	153		340	13	10	0
20	Chittagong	250 Bed Zila Sadar Hospital Brahmanbaria	Brahamanbaria	2019	September	260	96	200	156	198	158	0	341	15	15	0
21	Chittagong	250 Bed General Hospital Chandpur	Chandpur	2019	September	75	94	101	68	70	99		144	25	39
22	Chittagong	BITID Chittagong	Chittagong	2019	September	151	92	145	97	100	143		149	94
23	Chittagong	General Hospital Comilla	Comilla	2019	September	166	56	138	84	80	142		214	8	8
24	Chittagong	250 Bed General Hospital Cox’s Bazar	Cox'S Bazar	2019	September	268	166	230	104	204	130	20	309	5	5
25	Chittagong	250 Bed General Hospital Feni	Feni	2019	September	89	71	60	100	100	60	-	140	20	20	0
26	Chittagong	Adhunik General Hospital Khagrachari Hilly Zila Khagrachari	Khagrachhari	2019	September	87	11	74	24	42	56		68	30	30
27	Chittagong	Sadar Hospital Lakshmipur	Lakshmipur	2019	September	109	95	100	104	84	120		189	15
28	Chittagong	250 Bed General Hospital Noakhali	Noakhali	2019	September	173	94	138	129	114	153	19	108	159
29	Chittagong	General Hospital Rangamati	Rangamati	2019	September	63	36	66	33	18	81	25	74	0	0	0
30	Chittagong	250 Bed General Hospital Chittagong	Chittagong	2019	September	367	194	437	124	195	366		291	270	431
31	Chittagong	Civil Surgeon Office Bandarban Hilly Zila Bandarban	Bandarban	2019	September	60	30	55	35	36	54	41	36	13	10	0
32	Sylhet	Sylhet Shaheed Shamsuddin Ahmed Hospital Sylhet	Sylhet	2019	September	78	128	117	89	73	133	0	203	3	4
33	Sylhet	Adhunik Zila Sadar Hospital Habiganj	Habiganj	2019	September	87	60	89	58	35	112	0	125	22	0	0
34	Sylhet	250 Bed Zila Sadar Hospital Sunamganj	Sunamganj	2019	September	54	107	79	82	60	101	0	107	54	0	0
35	Sylhet	250 Bed Zila Sadar Hospital Moulvibazar	Maulvibazar	2019	September	85	30	70	45	30	85	0	100	15	115	0
36	Barisal	100 Bed Zila Sadar Hospital Barguna	Barguna	2019	September	130	200	110	220	120	210	30	250	50	50
37	Barisal	General Hospital Barisal	Barisal	2019	September	161	487	338	310	223	425		642	6	10
38	Barisal	Sdar Hospital Jhalokahti	Jhalokati	2019	September	49	238	87	200	124	163		236	51	12
39	Barisal	250 Bed Hospital patuakhali	Patuakhali	2019	September	36	150	86	100	86	100		186	0	0	0
40	Barisal	Sadar Hospital Pirojpur	Pirojpur	2019	September	70	227	111	186	90	207	0	286	11	24
41	Barisal	Sadar Hospital Bhola	Bhola	2019	September	78	231	88	221	78	231	0	309	0	0	0
42	Rangpur	250 Bed Zila Sadar Hospital Dinajpur	Dinajpur	2019	September	203	346	219	330	166	383	11	509	40
43	Rangpur	Zila Sdar Hopital Gaibandha	Gaibandha	2019	September	491	675	700	466	800	366	10	1226	100		0
44	Rangpur	General Hospital Kurigram	Kurigram	2019	September	170	130	170	130	160	140		210	90	50
45	Rangpur	100 Bed Sadar Hospital Lalmonirhat	Lalmonirhat	2019	September	158	137	200	95	119	176		200	95
46	Rangpur	Adunik Sadar Hospital Nilphamari	Nilphamari	2019	September	206	435	318	323	197	444	19	641
47	Rangpur	Civil Surgeon Office Rangpur	Rangpur	2019	September	103	178	111	170	151	130		269	22	46
48	Rangpur	Sadar Hospital Panchagarh	Panchagarh	2019	September	48	240	95	193	96	192	0	280	8	0	0
49	Rangpur	Adhunik Sadar Hospital Thakurgaon	Thakurgaon	2019	September	126	234	217	147	143	221	11	252	101	54	0
50	Rajshahi	Rajshahi Medcial College Hospital	Rajshahi	2019	September	189	84			273	86	88	89	96	100
51	Rajshahi	Sadar Hospital Chapinawabganj	Nawabganj	2019	September	28	19			25	22	15	28	4
52	Rajshahi	250 Bed General Hospital Pabna	Pabna	2019	September	36	30	40	26	28	38	0	64	2	1
53	Rajshahi	250 Bed Mohammad Ali Zila Hospital Bogra	Bogra	2019	September	345	592	400	537	277	660		732	205	194
54	Rajshahi	Adhunik Zila Hospital Joypurhat	Joypurhat	2019	September	690	360	500	550	650	400	150	550	350	0	0
55	Rajshahi	100 Bed Zila Sadar Hospital Naogaon	Naogaon	2019	September	108	67	92	83	78	97	0	163	14	4	0
56	Rajshahi	Adhunik Sadar Hospital Natore	Natore	2019	September	150	142	100	192	102	190	0	288	4	2	0
57	Rajshahi	General Hospital Sirajganj	Sirajganj	2019	September	33	7	31	9	11	29			40	75
58	Khulna	General Hospital Khulna	Khulna	2019	September	175	386	350	211	178	383		558	3	3
59	Khulna	Sadar Hospital Bagerhat	Bagerhat	2019	September	34	203	93	144	64	173	0	107	130	130	0
60	Khulna	Sadar Hospital Cuadanga	Chuadanga	2019	September	193	90	205	78	99	184	0	110	173	72	0
61	Khulna	250 Bed General Hospital Jessore	Jessore	2019	September	299	425	423	301	137	687	0	631	56	0	0
62	Khulna	Sadar Hospital Jhenaidah	Jhenaidah	2019	September	163	54	117	100	66	151	0	217	0	0	0
63	Khulna	250 Bed General Hospital Kustia	Kushtia	2019	September	310	220	334	196	248	282	260	230	40	0	0
64	Khulna	250 Bed General Hospital Magura	Magura	2019	September	90	129	94	125	79	140	5	123	91	7
65	Khulna	250 Bed General Hospital Meherpur	Meherpur	2019	September	60	63	40	83	62	61	0	115	8
66	Khulna	Sadar Hospital Narail	Narail	2019	September	83	32	69	46	43	72	0	101	14	0	0
67	Khulna	Sadar Hospital Satkhira	Satkhira	2019	September	154	149	150	153	98	205		289	14	14
68	Khulna	moniram	Jessore	2019	September	16	0	5	11	6	10	0	16	0	0	0
1	Dhaka	Infectious Disease Hospital (IDH)	Dhaka	2019	October	5795	2128	5684	2239	2546	5377		4566	3357		1
2	Dhaka	Civil Surgeon Office, Gopalganj	Gopalganj	2019	October	131	201	200	132	107	225	11	211	110	188
3	Dhaka	Shaheed Tajuddin Ahmed Medical College Hospital Gazipur	Gazipur	2019	October	320	199			200	319		478	6
4	Dhaka	250 Bed General Hospital Kishoreganj	Kishoreganj	2019	October	660	274	424	410	260	474	0	738	96	173	0
5	Dhaka	Sadar Hospital Madaripur	Madaripur	2019	October	210	250	200	260	178	282	0	280	180	0	0
6	Dhaka	250 Bed General Hospital Manikganj	Manikganj	2019	October	2061	955	1612	1404	1400	1600	15	1677	1308	0	0
7	Dhaka	250 Bed General Hospital Tangail	Tangail	2019	October	1818	2000	1081	1737	948	1870		2338	480	312
8	Dhaka	Shaheed Ahsan Ullah Master General Hospital Tongi	Gazipur	2019	October	368	173	308	233	100	441		526	15	2
9	Dhaka	Kurmitola General Hospital Kurmitola Dhaka	Dhaka	2019	October	55	45	52	48	41	59	40	46	14	7
10	Dhaka	Sadar Hospital Shariatpur	Shariatpur	2019	October	195	300	190	205	250	245	88	350	58	10	0
11	Dhaka	Sadar Hospital Narsingdi	Narshingdi	2019	October	284	86	151	219	184	186	0	191	179	20
12	Dhaka	Civil Surgeon Office Faridpur	Faridpur	2019	October	153	32	111	74	69	116	0	121	64	96	0
13	Dhaka	General Hospital Munshiganj	Munshiganj	2019	October	193	160	178	175	185	168	0	294	59	58
14	Dhaka	General Hospital Narayanganj	Narayanganj	2019	October	611	135	400	211			278	315	140	223
15	Dhaka	Sadar Hospital Rajbari	Rajbari	2019	October	168	192	361	211	60	300	11	249	11	15
16	Mymensing	Mymesing Medical College hospital Mymensing	Mymensingh	2019	October	594	553	614	533	351	796	0	842	305	198	0
17	Mymensing	Adhunik Sadar Hospital Netrokona	Netrakona	2019	October	220	192	210	202	200	212	0	409	3	1	0
18	Mymensing	Zila Hospital Sherpur	Sherpur	2019	October	172	254	220	206	152	274	45	374	7	0	0
19	Mymensing	250 Bed General Hospital Jamalpur	Jamalpur	2019	October	140	275	215	200	215	200		400	15	15	0
20	Chittagong	250 Bed Zila Sadar Hospital Brahmanbaria	Brahamanbaria	2019	October	411	45	200	256	197	259	0	436	20	20	0
21	Chittagong	250 Bed General Hospital Chandpur	Chandpur	2019	October	136	94	121	109	78	152		174	46	91
22	Chittagong	BITID Chittagong	Chittagong	2019	October	224	100	224	100	149	175		200	124
23	Chittagong	General Hospital Comilla	Comilla	2019	October	274	46	140	180	130	190		297	23	23
24	Chittagong	250 Bed General Hospital Cox’s Bazar	Cox'S Bazar	2019	October	297	157	174	180	196	258	5	392	75	55
25	Chittagong	250 Bed General Hospital Feni	Feni	2019	October	128	72	100	100	100	100	-	153	47	20	0
26	Chittagong	Adhunik General Hospital Khagrachari Hilly Zila Khagrachari	Khagrachhari	2019	October	94	15	73	36	37	72		72	37	37
27	Chittagong	Sadar Hospital Lakshmipur	Lakshmipur	2019	October	175	85	150	110	108	152		220	40
28	Chittagong	250 Bed General Hospital Noakhali	Noakhali	2019	October	145	106	214	137	165	186	21	127	224
29	Chittagong	General Hospital Rangamati	Rangamati	2019	October	98	42	98	42	14	126	11	129	0	0	0
30	Chittagong	250 Bed General Hospital Chittagong	Chittagong	2019	October	544	249	670	123	291	502		358	435	565
31	Chittagong	Civil Surgeon Office Bandarban Hilly Zila Bandarban	Bandarban	2019	October	55	26	46	35	30	51	45	25	11	15	0
32	Sylhet	Sylhet Shaheed Shamsuddin Ahmed Hospital Sylhet	Sylhet	2019	October	41	50	52	39	39	52	0	83	8	12
33	Sylhet	Adhunik Zila Sadar Hospital Habiganj	Habiganj	2019	October	101	64	99	65	68	97	0	118	47	0	0
34	Sylhet	250 Bed Zila Sadar Hospital Sunamganj	Sunamganj	2019	October	98	93	123	68	85	106	3	119	69	11	0
35	Sylhet	250 Bed Zila Sadar Hospital Moulvibazar	Maulvibazar	2019	October	120	65	90	95	85	100	0	170	15	185	0
36	Barisal	100 Bed Zila Sadar Hospital Barguna	Barguna	2019	October	144	300	140	304	145	190	44	340	60	60
37	Barisal	General Hospital Barisal	Barisal	2019	October	295	459	426	328	100	654	739		15	14
38	Barisal	Sdar Hospital Jhalokahti	Jhalokati	2019	October	85	280	130	235	175	195		297	73	12
39	Barisal	250 Bed Hospital patuakhali	Patuakhali	2019	October	59	141	90	110	90	110		198	2	4	0
40	Barisal	Sadar Hospital Pirojpur	Pirojpur	2019	October	75	293	157	211	116	252	0	357	11	20
41	Barisal	Sadar Hospital Bhola	Bhola	2019	October	131	189	96	224	93	217	0	320	0	0	0
42	Rangpur	250 Bed Zila Sadar Hospital Dinajpur	Dinajpur	2019	October	257	351	273	335	313	295	12	540	68
43	Rangpur	Zila Sdar Hopital Gaibandha	Gaibandha	2019	October	245	255	310	190	300	200	10	450	45		0
44	Rangpur	General Hospital Kurigram	Kurigram	2019	October	270	182	190	262	132	320		272	180	130
45	Rangpur	100 Bed Sadar Hospital Lalmonirhat	Lalmonirhat	2019	October	185	170	206	149	115	240		218	137	4
46	Rangpur	Adunik Sadar Hospital Nilphamari	Nilphamari	2019	October	271	467	357	381	214	524	22	738
47	Rangpur	Civil Surgeon Office Rangpur	Rangpur	2019	October	240	223	181	282	163	300		304	41	88
48	Rangpur	Sadar Hospital Panchagarh	Panchagarh	2019	October	71	227	100	198	100	198	0	282	16	0	0
49	Rangpur	Adhunik Sadar Hospital Thakurgaon	Thakurgaon	2019	October	123	205	225	103	107	221	7	214	107	60	0
50	Rajshahi	Rajshahi Medcial College Hospital	Rajshahi	2019	October	236	108			111	233	112	113	119	121
51	Rajshahi	Sadar Hospital Chapinawabganj	Nawabganj	2019	October	28	19			25	22	15	28	4
52	Rajshahi	250 Bed General Hospital Pabna	Pabna	2019	October	167	99	157	109	98	168	0	236	30	10
53	Rajshahi	250 Bed Mohammad Ali Zila Hospital Bogra	Bogra	2019	October	413	718	519	612	306	825		915	220	515
54	Rajshahi	Adhunik Zila Hospital Joypurhat	Joypurhat	2019	October	900	550	800	650	700	750	460	690	300	132	0
55	Rajshahi	100 Bed Zila Sadar Hospital Naogaon	Naogaon	2019	October	117	95	130	82	105	107	0	173	12	8	0
56	Rajshahi	Adhunik Sadar Hospital Natore	Natore	2019	October	174	143	174	143	143	174	0	307	10	10	0
57	Rajshahi	General Hospital Sirajganj	Sirajganj	2019	October	40	10	39	11	14	36			50	86
58	Khulna	General Hospital Khulna	Khulna	2019	October	219	379	360	238	80	518		594	4	4
59	Khulna	Sadar Hospital Bagerhat	Bagerhat	2019	October	78	196	123	274	87	187	0	107	167	167	0
60	Khulna	Sadar Hospital Cuadanga	Chuadanga	2019	October	245	107	259	93	147	205	0	216	136	99	0
61	Khulna	250 Bed General Hospital Jessore	Jessore	2019	October	351	479	497	309	189	617	0	538	79	0	0
62	Khulna	Sadar Hospital Jhenaidah	Jhenaidah	2019	October	233	77	76	234	97	213	0	316	0	0	0
63	Khulna	250 Bed General Hospital Kustia	Kushtia	2019	October	390	217	379	228	360	247	201	356	50	0	0
64	Khulna	250 Bed General Hospital Magura	Magura	2019	October	118	155	153	120	99	174	2	172	99	6
65	Khulna	250 Bed General Hospital Meherpur	Meherpur	2019	October	133	63	63	100	126	70	0	162	34
66	Khulna	Sadar Hospital Narail	Narail	2019	October	93	48	85	57	50	91	2	74	65	0	0
67	Khulna	Sadar Hospital Satkhira	Satkhira	2019	October	38	24	30	32	13	49		53	9	9
68	Khulna	moniram	Jessore	2019	October	13	0	9	4	2	11	0	13	0	0	0
1	Dhaka	Infectious Disease Hospital (IDH)	Dhaka	2019	November	6469	1843	5864	2448	2784	5528		4892	3420		1
2	Dhaka	Civil Surgeon Office, Gopalganj	Gopalganj	2019	November	209	199	208	200	138	170	28	221	165	264
3	Dhaka	Shaheed Tajuddin Ahmed Medical College Hospital Gazipur	Gazipur	2019	November	320	199			200	319		478	6
4	Dhaka	250 Bed General Hospital Kishoreganj	Kishoreganj	2019	November	586	231	420	397	305	512	0	725	92	180	0
5	Dhaka	Sadar Hospital Madaripur	Madaripur	2019	November	180	170	200	150	160	190	0	200	150	0	0
6	Dhaka	250 Bed General Hospital Manikganj	Manikganj	2019	November	2082	875	1534	1423	1395	1562	16	1692	1249	0	0
7	Dhaka	250 Bed General Hospital Tangail	Tangail	2019	November	1354	2038	1586	1806	1067	2325		3075	317	180
8	Dhaka	Shaheed Ahsan Ullah Master General Hospital Tongi	Gazipur	2019	November	300	100	298	102	88	312		389	11	11
9	Dhaka	Kurmitola General Hospital Kurmitola Dhaka	Dhaka	2019	November	62	43	70	45	33	82	44	38	23	4
10	Dhaka	Sadar Hospital Shariatpur	Shariatpur	2019	November	282	186	195	273	240	228	110	282	36	17	0
11	Dhaka	Sadar Hospital Narsingdi	Narshingdi	2019	November	357	103	205	255	151	309	0	280	180	24	0
12	Dhaka	Civil Surgeon Office Faridpur	Faridpur	2019	November	125	35	96	64	53	107	0	113	47	70	0
13	Dhaka	General Hospital Munshiganj	Munshiganj	2019	November	220	145	200	165	189	176	0	314	51	48
14	Dhaka	General Hospital Narayanganj	Narayanganj	2019	November	639	296	500	139	338	466	320	353	131	173
15	Dhaka	Sadar Hospital Rajbari	Rajbari	2019	November	270	229	110	138	77	422	10	480	29	15
16	Mymensing	Mymesing Medical College hospital Mymensing	Mymensingh	2019	November	865	497	701	661	374	988	0	921	441	330	0
17	Mymensing	Adhunik Sadar Hospital Netrokona	Netrakona	2019	November	320	194	310	204	291	223	0	498	16	7	0
18	Mymensing	Zila Hospital Sherpur	Sherpur	2019	November	214	240	321	133	166	288	56	390	8	0	0
19	Mymensing	250 Bed General Hospital Jamalpur	Jamalpur	2019	November	312	318	330	300	400	230		600	30	20	0
20	Chittagong	250 Bed Zila Sadar Hospital Brahmanbaria	Brahamanbaria	2019	November	462	50	300	212	362	150	0	493	19	19	0
21	Chittagong	250 Bed General Hospital Chandpur	Chandpur	2019	November	145	102	150	97	93	154		194	53	83
22	Chittagong	BITID Chittagong	Chittagong	2019	November	250	82	211	121	122	210		199	133	190	1
23	Chittagong	General Hospital Comilla	Comilla	2019	November	300	49	239	140	140	239		359	20	20
24	Chittagong	250 Bed General Hospital Cox’s Bazar	Cox'S Bazar	2019	November	248	150	259	139	193	205	0	372	26	26
25	Chittagong	250 Bed General Hospital Feni	Feni	2019	November	230	80	150	160	150	160	-	240	70	47	0
26	Chittagong	Adhunik General Hospital Khagrachari Hilly Zila Khagrachari	Khagrachhari	2019	November	78	12	69	20	29	61		58	32	32
27	Chittagong	Sadar Hospital Lakshmipur	Lakshmipur	2019	November	256	103	209	150	137	222		299	60
28	Chittagong	250 Bed General Hospital Noakhali	Noakhali	2019	November	237	194	222	209	212	219	15	166	265
29	Chittagong	General Hospital Rangamati	Rangamati	2019	November	122	36	96	52	33	115	35	113	1	1	0
30	Chittagong	250 Bed General Hospital Chittagong	Chittagong	2019	November	591	230	630	191	316	505		367	454	845
31	Chittagong	Civil Surgeon Office Bandarban Hilly Zila Bandarban	Bandarban	2019	November	62	29	50	41	36	55	56	26	9	19	0
32	Sylhet	Sylhet Shaheed Shamsuddin Ahmed Hospital Sylhet	Sylhet	2019	November	127	122	149	98	87	160	0	211	36	40
33	Sylhet	Adhunik Zila Sadar Hospital Habiganj	Habiganj	2019	November	107	58	106	59	61	104	0	154	11	0	0
34	Sylhet	250 Bed Zila Sadar Hospital Sunamganj	Sunamganj	2019	November	94	69	106	57	60	103	19	109	35	41	0
35	Sylhet	250 Bed Zila Sadar Hospital Moulvibazar	Maulvibazar	2019	November	115	170	150	135	105	180	0	260	25	285	0
36	Barisal	100 Bed Zila Sadar Hospital Barguna	Barguna	2019	November	170	301	150	321	171	300	36	400	35	35
37	Barisal	General Hospital Barisal	Barisal	2019	November	376	463	476	363	282	557		821	18	20
38	Barisal	Sdar Hospital Jhalokahti	Jhalokati	2019	November	134	278	149	223	180	232		272	140	281
39	Barisal	250 Bed Hospital patuakhali	Patuakhali	2019	November	0	0	0	0		0	0	0	0	0	0
40	Barisal	Sadar Hospital Pirojpur	Pirojpur	2019	November	161	273	196	238	121	313	0	418	16	30
41	Barisal	Sadar Hospital Bhola	Bhola	2019	November	220	143	122	241	120	243	12	347	4	0	0
42	Rangpur	250 Bed Zila Sadar Hospital Dinajpur	Dinajpur	2019	November	359	330	310	379	321	368	11	611	78
43	Rangpur	Zila Sdar Hopital Gaibandha	Gaibandha	2019	November	300	215	285	230	300	215	5	500	10	55	0
44	Rangpur	General Hospital Kurigram	Kurigram	2019	November	242	138	230	150	154	226		295	85	70
45	Rangpur	100 Bed Sadar Hospital Lalmonirhat	Lalmonirhat	2019	November	355	107	290	172	144	318		341	121	196
46	Rangpur	Adunik Sadar Hospital Nilphamari	Nilphamari	2019	November	408	412	437	383	293	527	9	785	35	56
47	Rangpur	Civil Surgeon Office Rangpur	Rangpur	2019	November	238	172	203	207	178	232		373	37	93
48	Rangpur	Sadar Hospital Panchagarh	Panchagarh	2019	November	108	167	91	184	91	184	0	261	14	0	0
49	Rangpur	Adhunik Sadar Hospital Thakurgaon	Thakurgaon	2019	November	211	171	275	107	115	267	9	367	106	97	0
50	Rajshahi	Rajshahi Medcial College Hospital	Rajshahi	2019	November	415	201			207	409	204	201	211	215
51	Rajshahi	Sadar Hospital Chapinawabganj	Nawabganj	2019	November	28	19			25	22	15	28	4
52	Rajshahi	250 Bed General Hospital Pabna	Pabna	2019	November	243	91	202	132	102	232	0	311	23	6
53	Rajshahi	250 Bed Mohammad Ali Zila Hospital Bogra	Bogra	2019	November	380	990	760	610	415	955		990	379	557
54	Rajshahi	Adhunik Zila Hospital Joypurhat	Joypurhat	2019	November	1050	490	990	550	850	690	500	590	450	0	0
55	Rajshahi	100 Bed Zila Sadar Hospital Naogaon	Naogaon	2019	November	192	117	185	124	130	179	0	278	35	35	0
56	Rajshahi	Adhunik Sadar Hospital Natore	Natore	2019	November	350	115	350	115	115	350	0	409	56	108	0
57	Rajshahi	General Hospital Sirajganj	Sirajganj	2019	November	62	11	61	12	21	52			73	148
58	Khulna	General Hospital Khulna	Khulna	2019	November	405	411	432	384	250	566		812	4	4
59	Khulna	Sadar Hospital Bagerhat	Bagerhat	2019	November	125	176	133	168	89	212	0	194	104	104	0
60	Khulna	Sadar Hospital Cuadanga	Chuadanga	2019	November	457	118	414	161	173	402	0	425	150	92	0
61	Khulna	250 Bed General Hospital Jessore	Jessore	2019	November	852	654	963	543	227	1279	0	1423	83	82	0
62	Khulna	Sadar Hospital Jhenaidah	Jhenaidah	2019	November	352	88	223	217	126	314	0	417	23	23	0
63	Khulna	250 Bed General Hospital Kustia	Kushtia	2019	November	487	385	502	370	523	349	256	475	141	0	0
64	Khulna	250 Bed General Hospital Magura	Magura	2019	November	222	124	190	156	121	225	5	235	106	18
65	Khulna	250 Bed General Hospital Meherpur	Meherpur	2019	November	236	77	77	236	205	108	0	274	39	69
66	Khulna	Sadar Hospital Narail	Narail	2019	November	136	57	132	61	53	140	0	104	89	0	0
67	Khulna	Sadar Hospital Satkhira	Satkhira	2019	November	320	149	235	234	142	327		419	50	50
68	Khulna	moniram	Jessore	2019	November	40	0	21	19	9	31	0	40	0	0	0
1	Dhaka	Infectious Disease Hospital (IDH)	Dhaka	2019	December	5603	1912	4658	2857	1786	5729		4402	3113		8
2	Dhaka	Civil Surgeon Office, Gopalganj	Gopalganj	2019	December	220	176	200	196	137	259	7	235	154	174
3	Dhaka	Shaheed Tajuddin Ahmed Medical College Hospital Gazipur	Gazipur	2019	December	320	199			200	319		478	6
4	Dhaka	250 Bed General Hospital Kishoreganj	Kishoreganj	2019	December	535	228	397	367	294	470	0	694	70	125	0
5	Dhaka	Sadar Hospital Madaripur	Madaripur	2019	December	234	307	260	281	190	351	0	416	125	65	0
6	Dhaka	250 Bed General Hospital Manikganj	Manikganj	2019	December	2022	925	1564	1384	1415	1533	15	1652	1281	0	0
7	Dhaka	250 Bed General Hospital Tangail	Tangail	2019	December	1454	1928	1564	1818	1111	2271		3111	271	166
8	Dhaka	Shaheed Ahsan Ullah Master General Hospital Tongi	Gazipur	2019	December	465	162	400	227	195	432		614	13	13
9	Dhaka	Kurmitola General Hospital Kurmitola Dhaka	Dhaka	2019	December	92	76	106	62	70	98	66	62	40	10
10	Dhaka	Sadar Hospital Shariatpur	Shariatpur	2019	December	255	128	166	217	185	198	78	252	53	11	0
11	Dhaka	Sadar Hospital Narsingdi	Narshingdi	2019	December	348	97	200	245	145	300	0	187	258	19	0
12	Dhaka	Civil Surgeon Office Faridpur	Faridpur	2019	December	190	40	138	92	79	151	0	161	69	104	0
13	Dhaka	General Hospital Munshiganj	Munshiganj	2019	December	192	138	180	150	170	160	0	199	31	30
14	Dhaka	General Hospital Narayanganj	Narayanganj	2019	December	495	97	300	195	277	315	361	182	49	66
15	Dhaka	Sadar Hospital Rajbari	Rajbari	2019	December	289	274	308	155	52	511	70	883	8	98
16	Mymensing	Mymesing Medical College hospital Mymensing	Mymensingh	2019	December	692	411	613	490	285	818	0	793	310	149	0
17	Mymensing	Adhunik Sadar Hospital Netrokona	Netrakona	2019	December	243	166	233	176	190	219	0	394	15	5	0
18	Mymensing	Zila Hospital Sherpur	Sherpur	2019	December	160	198	220	138	145	213	50	302	6	0	0
19	Mymensing	250 Bed General Hospital Jamalpur	Jamalpur	2019	December	278	296	374	200	374	200		550	24	20	0
20	Chittagong	250 Bed Zila Sadar Hospital Brahmanbaria	Brahamanbaria	2019	December	280	52	232	100	186	146	0	244	44	44	0
21	Chittagong	250 Bed General Hospital Chandpur	Chandpur	2019	December	151	102	156	97	118	135		223	30	46
22	Chittagong	BITID Chittagong	Chittagong	2019	December	202	95	168	129	117	180		180	117	210	1
23	Chittagong	General Hospital Comilla	Comilla	2019	December	281	37	170	148	139	179		308	10	10
24	Chittagong	250 Bed General Hospital Cox’s Bazar	Cox'S Bazar	2019	December	306	143	296	253	208	241	0	403	46	46
25	Chittagong	250 Bed General Hospital Feni	Feni	2019	December	228	82	150	160	150	160	-	212	98	98	0
26	Chittagong	Adhunik General Hospital Khagrachari Hilly Zila Khagrachari	Khagrachhari	2019	December	46	8	40	14	17	37		42	12	12
27	Chittagong	Sadar Hospital Lakshmipur	Lakshmipur	2019	December	228	84	162	150	145	167		284	28
28	Chittagong	250 Bed General Hospital Noakhali	Noakhali	2019	December	320	91	218	193	197	214	12	146	265
29	Chittagong	General Hospital Rangamati	Rangamati	2019	December	98	27	94	31	29	96	27	94	4	4	0
30	Chittagong	250 Bed General Hospital Chittagong	Chittagong	2019	December	364	298	453	209	219	343		398	264	498
31	Chittagong	Civil Surgeon Office Bandarban Hilly Zila Bandarban	Bandarban	2019	December	84	35	61	58	43	76	61	30	28	14	0
32	Sylhet	Sylhet Shaheed Shamsuddin Ahmed Hospital Sylhet	Sylhet	2019	December	146	109	156	99	109	146	0	235	0	0
33	Sylhet	Adhunik Zila Sadar Hospital Habiganj	Habiganj	2019	December	105	45	120	30	68	82	0	135	15	0	0
34	Sylhet	250 Bed Zila Sadar Hospital Sunamganj	Sunamganj	2019	December	116	103	142	77	95	124	38	151	38	37	0
35	Sylhet	250 Bed Zila Sadar Hospital Moulvibazar	Maulvibazar	2019	December	170	90	160	100	80	180	0	220	40	220	0
36	Barisal	100 Bed Zila Sadar Hospital Barguna	Barguna	2019	December	210	303	161	313	200	313	36	400	35	35
37	Barisal	General Hospital Barisal	Barisal	2019	December	436	486	512	410	353	569		900	22	29
38	Barisal	Sdar Hospital Jhalokahti	Jhalokati	2019	December	137	181	128	190	166	152		217	101	167
39	Barisal	250 Bed Hospital patuakhali	Patuakhali	2019	December	0	0	0	0	0	0	0	0	0	0	0
40	Barisal	Sadar Hospital Pirojpur	Pirojpur	2019	December	155	271	217	209	150	276	0	408	18	33
41	Barisal	Sadar Hospital Bhola	Bhola	2019	December	170	193	128	235	143	220	9	354	0	0	0
42	Rangpur	250 Bed Zila Sadar Hospital Dinajpur	Dinajpur	2019	December	305	215	209	311	203	317	11	419	91
43	Rangpur	Zila Sdar Hopital Gaibandha	Gaibandha	2019	December	300	215	280	235	280	235	5	505	10	197	0
44	Rangpur	General Hospital Kurigram	Kurigram	2019	December	380	176	240	316	222	334		436	120	100
45	Rangpur	100 Bed Sadar Hospital Lalmonirhat	Lalmonirhat	2019	December	318	112	292	138	108	322		302	128	168
46	Rangpur	Adunik Sadar Hospital Nilphamari	Nilphamari	2019	December	436	309	373	372	248	497	5	704	41	73
47	Rangpur	Civil Surgeon Office Rangpur	Rangpur	2019	December	233	122	186	169	158	197		272	83	152
48	Rangpur	Sadar Hospital Panchagarh	Panchagarh	2019	December	86	177	100	163	87	176	0	242	25	0	0
49	Rangpur	Adhunik Sadar Hospital Thakurgaon	Thakurgaon	2019	December	222	147	272	97	108	261	10	260	99	132	0
50	Rajshahi	Rajshahi Medcial College Hospital	Rajshahi	2019	December	437	237			257	417	253	179	242	244
51	Rajshahi	Sadar Hospital Chapinawabganj	Nawabganj	2019	December	28	19			25	22	15	28	4
52	Rajshahi	250 Bed General Hospital Pabna	Pabna	2019	December	95	28	73	50	47	76	0	115	8	2
53	Rajshahi	250 Bed Mohammad Ali Zila Hospital Bogra	Bogra	2019	December	336	582	412	536	238	710		906	312	229
54	Rajshahi	Adhunik Zila Hospital Joypurhat	Joypurhat	2019	December	900	500	900	400	850	500	500	400	400	250	0
55	Rajshahi	100 Bed Zila Sadar Hospital Naogaon	Naogaon	2019	December	188	65	125	128	160	93	0	235	34	34	0
56	Rajshahi	Adhunik Sadar Hospital Natore	Natore	2019	December	410	115	410	162	162	410	0	534	38	79	0
57	Rajshahi	General Hospital Sirajganj	Sirajganj	2019	December	28	6	26	8	9	25			34	62
58	Khulna	General Hospital Khulna	Khulna	2019	December	472	363	435	400	277	558		826	9	9
59	Khulna	Sadar Hospital Bagerhat	Bagerhat	2019	December	117	178	170	125	84	211	0	204	91	91	0
60	Khulna	Sadar Hospital Cuadanga	Chuadanga	2019	December	460	140	472	128	94	506	2	370	230	333	0
61	Khulna	250 Bed General Hospital Jessore	Jessore	2019	December	868	433	772	529	301	1000	0	1132	169	338	0
62	Khulna	Sadar Hospital Jhenaidah	Jhenaidah	2019	December	407	78	191	294	150	335	0	446	39	39	0
63	Khulna	250 Bed General Hospital Kustia	Kushtia	2019	December	500	230	379	351	458	272	60	240	430	0	0
64	Khulna	250 Bed General Hospital Magura	Magura	2019	December	140	132	207	134	124	248	100	190	84	6
65	Khulna	250 Bed General Hospital Meherpur	Meherpur	2019	December	199	84	84	199	190	93	0	247	36	64
66	Khulna	Sadar Hospital Narail	Narail	2019	December	118	48	107	72	57	119	20	133	26	0	0
67	Khulna	Sadar Hospital Satkhira	Satkhira	2019	December	357	134	240	251	152	339		491	0	0
68	Khulna	moniram	Jessore	2019	December	50	12	37	25	18	44	0	62	0	0	0
1	Dhaka	Infectious Disease Hospital (IDH)	Dhaka	2020	January	5266	1920	4987	2199	1468	5718		4315	2871		6
2	Dhaka	Civil Surgeon Office, Gopalganj	Gopalganj	2020	January
3	Dhaka	Shaheed Tajuddin Ahmed Medical College Hospital Gazipur	Gazipur	2020	January
4	Dhaka	250 Bed General Hospital Kishoreganj	Kishoreganj	2020	January	687	225	420	392	305	507	0	717	95	172	0
5	Dhaka	Sadar Hospital Madaripur	Madaripur	2020	January	221	269	252	238	193	297	0	395	95	97	0
6	Dhaka	250 Bed General Hospital Manikganj	Manikganj	2020	January	2322	852	1638	1536	1519	1655	5	855	2314	146	0
7	Dhaka	250 Bed General Hospital Tangail	Tangail	2020	January	1358	1792	1618	1532	1098	2052		2852	298	263
8	Dhaka	Shaheed Ahsan Ullah Master General Hospital Tongi	Gazipur	2020	January	328	53	195	186	150	231		331	50	19
9	Dhaka	Kurmitola General Hospital Kurmitola Dhaka	Dhaka	2020	January
10	Dhaka	Sadar Hospital Shariatpur	Shariatpur	2020	January	280	134	155	259	200	214	95	284	35	5	0
11	Dhaka	Sadar Hospital Narsingdi	Narshingdi	2020	January	293	132	185	240	193	232	0	245	180	12	0
12	Dhaka	Civil Surgeon Office Faridpur	Faridpur	2020	January	117	38	93	62	64	91	0	115	40	60	0
13	Dhaka	General Hospital Munshiganj	Munshiganj	2020	January	227	133	200	160	190	170	0	331	29	28
14	Dhaka	General Hospital Narayanganj	Narayanganj	2020	January
15	Dhaka	Sadar Hospital Rajbari	Rajbari	2020	January
16	Mymensing	Mymesing Medical College hospital Mymensing	Mymensingh	2020	January	529	401	482	448	286	644	0	720	210	223
17	Mymensing	Adhunik Sadar Hospital Netrokona	Netrakona	2020	January	275	155	255	175	210	220	0	424	6	3	0
18	Mymensing	Zila Hospital Sherpur	Sherpur	2020	January	138	185	210	113	135	188	65	250	8	0	0
19	Mymensing	250 Bed General Hospital Jamalpur	Jamalpur	2020	January	302	303	400	205	400	205		590	15	15	0
20	Chittagong	250 Bed Zila Sadar Hospital Brahmanbaria	Brahamanbaria	2020	January
21	Chittagong	250 Bed General Hospital Chandpur	Chandpur	2020	January
22	Chittagong	BITID Chittagong	Chittagong	2020	January	177	84	149	112	100	161		140	121	203	1
23	Chittagong	General Hospital Comilla	Comilla	2020	January
24	Chittagong	250 Bed General Hospital Cox’s Bazar	Cox'S Bazar	2020	January	249	131	240	140	186	194	356	24	24	24
25	Chittagong	250 Bed General Hospital Feni	Feni	2020	January
26	Chittagong	Adhunik General Hospital Khagrachari Hilly Zila Khagrachari	Khagrachhari	2020	January
27	Chittagong	Sadar Hospital Lakshmipur	Lakshmipur	2020	January
28	Chittagong	250 Bed General Hospital Noakhali	Noakhali	2020	January
29	Chittagong	General Hospital Rangamati	Rangamati	2020	January	61	30	65	26	25	66	5	72	14	14	0
30	Chittagong	250 Bed General Hospital Chittagong	Chittagong	2020	January
31	Chittagong	Civil Surgeon Office Bandarban Hilly Zila Bandarban	Bandarban	2020	January
32	Sylhet	Sylhet Shaheed Shamsuddin Ahmed Hospital Sylhet	Sylhet	2020	January	148	131	180	99	107	172	0	214	65	81
33	Sylhet	Adhunik Zila Sadar Hospital Habiganj	Habiganj	2020	January	97	69	121	45	128	38	0	119	47	0	0
34	Sylhet	250 Bed Zila Sadar Hospital Sunamganj	Sunamganj	2020	January	83	62	20	63	56	89	24	93	28	39	0
35	Sylhet	250 Bed Zila Sadar Hospital Moulvibazar	Maulvibazar	2020	January	160	65	125	100	55	170	20	190	15	225	0
36	Barisal	100 Bed Zila Sadar Hospital Barguna	Barguna	2020	January	270	300	200	370	200	370	155	450	70	50
37	Barisal	General Hospital Barisal	Barisal	2020	January	408	456	487	377	319	545		827	37	62
38	Barisal	Sdar Hospital Jhalokahti	Jhalokati	2020	January	131	321	138	314	115	337		397	55	47
39	Barisal	250 Bed Hospital patuakhali	Patuakhali	2020	January	89	129	100	109	100	109		200	9	20	0
40	Barisal	Sadar Hospital Pirojpur	Pirojpur	2020	January	153	275	188	240	121	307	0	417	11	20
41	Barisal	Sadar Hospital Bhola	Bhola	2020	January	85	152	59	178	85	152	3	234	0	6	0
42	Rangpur	250 Bed Zila Sadar Hospital Dinajpur	Dinajpur	2020	January
43	Rangpur	Zila Sdar Hopital Gaibandha	Gaibandha	2020	January	270	140	180	130	300	110	10	385	15	15	0
44	Rangpur	General Hospital Kurigram	Kurigram	2020	January	196	132	173	155	145	183		238	90	55
45	Rangpur	100 Bed Sadar Hospital Lalmonirhat	Lalmonirhat	2020	January	298	115	253	160	110	303		311	102	209
46	Rangpur	Adunik Sadar Hospital Nilphamari	Nilphamari	2020	January	336	378	385	329	233	481	20	689	25	48
47	Rangpur	Civil Surgeon Office Rangpur	Rangpur	2020	January
48	Rangpur	Sadar Hospital Panchagarh	Panchagarh	2020	January	78	147	105	120	81	144	0	212	13	0	0
49	Rangpur	Adhunik Sadar Hospital Thakurgaon	Thakurgaon	2020	January	220	150	266	104	141	229	7	226	137	205	0
50	Rajshahi	Rajshahi Medcial College Hospital	Rajshahi	2020	January	477	219			246	450	233	129	334	335
51	Rajshahi	Sadar Hospital Chapinawabganj	Nawabganj	2020	January
52	Rajshahi	250 Bed General Hospital Pabna	Pabna	2020	January	242	177	250	169	139	280	0	369	50	16
53	Rajshahi	250 Bed Mohammad Ali Zila Hospital Bogra	Bogra	2020	January
54	Rajshahi	Adhunik Zila Hospital Joypurhat	Joypurhat	2020	January	1090	500	950	690	850	740	600	640	350	0	0
55	Rajshahi	100 Bed Zila Sadar Hospital Naogaon	Naogaon	2020	January	175	53	140	88	80	148	0	180	48	48	0
56	Rajshahi	Adhunik Sadar Hospital Natore	Natore	2020	January	316	174	316	174	174	174	0	316	26	53	0
57	Rajshahi	General Hospital Sirajganj	Sirajganj	2020	January	47	21	50	18	22	46			68	130
58	Khulna	General Hospital Khulna	Khulna	2020	January	433	344	476	301	291	486		771	6	6
59	Khulna	Sadar Hospital Bagerhat	Bagerhat	2020	January	118	250	148	220	122	246	0	334	34	34	0
60	Khulna	Sadar Hospital Cuadanga	Chuadanga	2020	January	403	159	455	107	169	393	2	361	20	85	0
61	Khulna	250 Bed General Hospital Jessore	Jessore	2020	January	924	552	876	600	299	1177	0	1292	184	544	0
62	Khulna	Sadar Hospital Jhenaidah	Jhenaidah	2020	January	311	78	164	225	90	299	0	383	6	6	0
63	Khulna	250 Bed General Hospital Kustia	Kushtia	2020	January	450	360	455	355	500	310	89	291	430	0	0
64	Khulna	250 Bed General Hospital Magura	Magura	2020	January	191	132	188	135	118	205	19	221	83	10
65	Khulna	250 Bed General Hospital Meherpur	Meherpur	2020	January	253	86	26	313	226	113	0	250	89	90
66	Khulna	Sadar Hospital Narail	Narail	2020	January	123	61	117	65	63	119	28	150	6	0	0
67	Khulna	Sadar Hospital Satkhira	Satkhira	2020	January	355	161	205	311	95	421		475	41	41
68	Khulna	moniram	Jessore	2020	January	0	0	0	0	0	0	0	0	0	0	0
1	Dhaka	Infectious Disease Hospital (IDH)	Dhaka	2020	February	4777	1898	4125	2550	1256	5419		4012	2663		2
2	Dhaka	Civil Surgeon Office, Gopalganj	Gopalganj	2020	February
3	Dhaka	Shaheed Tajuddin Ahmed Medical College Hospital Gazipur	Gazipur	2020	February
4	Dhaka	250 Bed General Hospital Kishoreganj	Kishoreganj	2020	February	595	236	444	387	302	529	0	785	46	90	0
5	Dhaka	Sadar Hospital Madaripur	Madaripur	2020	February	200	295	223	272	201	294	0	337	158	38	0
6	Dhaka	250 Bed General Hospital Manikganj	Manikganj	2020	February	1689	1019	1455	1253	1262	1446	4	861	1843	78	0
7	Dhaka	250 Bed General Hospital Tangail	Tangail	2020	February	1212	1859	1358	1713	1065	2006		2837	234	234
8	Dhaka	Shaheed Ahsan Ullah Master General Hospital Tongi	Gazipur	2020	February	307	117	250	174	140	284		349	75	29
9	Dhaka	Kurmitola General Hospital Kurmitola Dhaka	Dhaka	2020	February
10	Dhaka	Sadar Hospital Shariatpur	Shariatpur	2020	February	148	233	170	211	150	231	38	317	26	7	0
11	Dhaka	Sadar Hospital Narsingdi	Narshingdi	2020	February	252	103	161	194	155	200	0	218	137	17	0
12	Dhaka	Civil Surgeon Office Faridpur	Faridpur	2020	February	137	73	126	84	92	118	0	173	37	56	0
13	Dhaka	General Hospital Munshiganj	Munshiganj	2020	February	150	110	140	120	125	135	0	230	30	30
14	Dhaka	General Hospital Narayanganj	Narayanganj	2020	February
15	Dhaka	Sadar Hospital Rajbari	Rajbari	2020	February
16	Mymensing	Mymesing Medical College hospital Mymensing	Mymensingh	2020	February	526	556	614	468	317	765	0	811	271	142	0
17	Mymensing	Adhunik Sadar Hospital Netrokona	Netrakona	2020	February	260	165	293	132	290	135	0	417	8	5	0
18	Mymensing	Zila Hospital Sherpur	Sherpur	2020	February	151	198	199	150	145	204	80	257	12	0	0
19	Mymensing	250 Bed General Hospital Jamalpur	Jamalpur	2020	February	248	296	244	200	344	200		524	20	20	0
20	Chittagong	250 Bed Zila Sadar Hospital Brahmanbaria	Brahamanbaria	2020	February
21	Chittagong	250 Bed General Hospital Chandpur	Chandpur	2020	February
22	Chittagong	BITID Chittagong	Chittagong	2020	February	126	66	131	61	71	121		114	78	135	1
23	Chittagong	General Hospital Comilla	Comilla	2020	February
24	Chittagong	250 Bed General Hospital Cox’s Bazar	Cox'S Bazar	2020	February	257	153	290	120	211	199	375	35	35	35
25	Chittagong	250 Bed General Hospital Feni	Feni	2020	February
26	Chittagong	Adhunik General Hospital Khagrachari Hilly Zila Khagrachari	Khagrachhari	2020	February
27	Chittagong	Sadar Hospital Lakshmipur	Lakshmipur	2020	February
28	Chittagong	250 Bed General Hospital Noakhali	Noakhali	2020	February
29	Chittagong	General Hospital Rangamati	Rangamati	2020	February	92	26	84	34	30	88	10	80	28	28	0
30	Chittagong	250 Bed General Hospital Chittagong	Chittagong	2020	February
31	Chittagong	Civil Surgeon Office Bandarban Hilly Zila Bandarban	Bandarban	2020	February
32	Sylhet	Sylhet Shaheed Shamsuddin Ahmed Hospital Sylhet	Sylhet	2020	February	134	156	184	106	106	184	0	211	79	112
33	Sylhet	Adhunik Zila Sadar Hospital Habiganj	Habiganj	2020	February	45	22	50	17	53	14	0	56	11	0	0
34	Sylhet	250 Bed Zila Sadar Hospital Sunamganj	Sunamganj	2020	February	78	83	91	70	71	90	21	114	26	38	0
35	Sylhet	250 Bed Zila Sadar Hospital Moulvibazar	Maulvibazar	2020	February	175	85	120	140	85	175	30	210	10	260	0
36	Barisal	100 Bed Zila Sadar Hospital Barguna	Barguna	2020	February	230	306	230	306	220	316	172	480	80	55
37	Barisal	General Hospital Barisal	Barisal	2020	February	304	458	431	331	296	466		743	19	32
38	Barisal	Sdar Hospital Jhalokahti	Jhalokati	2020	February	97	272	155	215	136	233		362	7	5
39	Barisal	250 Bed Hospital patuakhali	Patuakhali	2020	February	115	134	109	140	109	140		244	5	10	0
40	Barisal	Sadar Hospital Pirojpur	Pirojpur	2020	February	150	264	195	219	128	286	0	392	22	42
41	Barisal	Sadar Hospital Bhola	Bhola	2020	February	196	227	127	296	195	228	4	415	4	20	0
42	Rangpur	250 Bed Zila Sadar Hospital Dinajpur	Dinajpur	2020	February
43	Rangpur	Zila Sdar Hopital Gaibandha	Gaibandha	2020	February	195	200	200	195	200	195	5	375	15	35	0
44	Rangpur	General Hospital Kurigram	Kurigram	2020	February	194	188	222	160	150	232		277	105	80
45	Rangpur	100 Bed Sadar Hospital Lalmonirhat	Lalmonirhat	2020	February	272	124	257	139	107	289		303	93	192
46	Rangpur	Adunik Sadar Hospital Nilphamari	Nilphamari	2020	February	345	393	389	349	244	494	27	723	15	18
47	Rangpur	Civil Surgeon Office Rangpur	Rangpur	2020	February
48	Rangpur	Sadar Hospital Panchagarh	Panchagarh	2020	February	73	172	115	130	91	154	0	230	15	0	0
49	Rangpur	Adhunik Sadar Hospital Thakurgaon	Thakurgaon	2020	February	179	167	249	97	123	223	5	191	150	139	0
50	Rajshahi	Rajshahi Medcial College Hospital	Rajshahi	2020	February	312	188			107	393	185	112	203	204
51	Rajshahi	Sadar Hospital Chapinawabganj	Nawabganj	2020	February
52	Rajshahi	250 Bed General Hospital Pabna	Pabna	2020	February	193	140	200	133	120	213	0	303	30	10
53	Rajshahi	250 Bed Mohammad Ali Zila Hospital Bogra	Bogra	2020	February
54	Rajshahi	Adhunik Zila Hospital Joypurhat	Joypurhat	2020	February	900	400	850	450	900	400	1300	600	300	14	0
55	Rajshahi	100 Bed Zila Sadar Hospital Naogaon	Naogaon	2020	February	152	93	165	80	65	180	0	244	1	1	0
56	Rajshahi	Adhunik Sadar Hospital Natore	Natore	2020	February	325	217	325	217	217	217	0	325	2	4	0
57	Rajshahi	General Hospital Sirajganj	Sirajganj	2020	February	17	8	18	7	8	17			25	37
58	Khulna	General Hospital Khulna	Khulna	2020	February	417	441	530	328	272	586		853	5	5
59	Khulna	Sadar Hospital Bagerhat	Bagerhat	2020	February	105	125	122	108	98	132	0	206	32	32	0
60	Khulna	Sadar Hospital Cuadanga	Chuadanga	2020	February	30	131	296	143	140	299	2	285	154	52	0
61	Khulna	250 Bed General Hospital Jessore	Jessore	2020	February	651	479	674	502	380	750	0	978	152	236	0
62	Khulna	Sadar Hospital Jhenaidah	Jhenaidah	2020	February	261	103	140	224	98	266	0	345	19	0	0
63	Khulna	250 Bed General Hospital Kustia	Kushtia	2020	February	448	315	446	317	425	338	93	295	375	0	0
64	Khulna	250 Bed General Hospital Magura	Magura	2020	February	148	141	173	116	98	191	9	214	66	10
65	Khulna	250 Bed General Hospital Meherpur	Meherpur	2020	February	192	90	90	192	192	90	0	210	25	49
66	Khulna	Sadar Hospital Narail	Narail	2020	February	116	75	116	75	68	123	12	161	18	0	0
67	Khulna	Sadar Hospital Satkhira	Satkhira	2020	February	277	168	245	200	107	338		405	50	50
68	Khulna	moniram	Jessore	2020	February	0	0	0	0	0	0	0	0	0	0	0
1	Dhaka	Infectious Disease Hospital (IDH)	Dhaka	2020	March	3927	1715	3456	2186	1135	4507		3349	2293		1
2	Dhaka	Civil Surgeon Office, Gopalganj	Gopalganj	2020	March
3	Dhaka	Shaheed Tajuddin Ahmed Medical College Hospital Gazipur	Gazipur	2020	March
4	Dhaka	250 Bed General Hospital Kishoreganj	Kishoreganj	2020	March	462	209	346	325	212	459	0	636	35	55	0
5	Dhaka	Sadar Hospital Madaripur	Madaripur	2020	March	170	215	165	220	153	232	0	264	121	0	0
6	Dhaka	250 Bed General Hospital Manikganj	Manikganj	2020	March	1340	983	1274	1069	1079	1264	3	720	1620	82	0
7	Dhaka	250 Bed General Hospital Tangail	Tangail	2020	March	1002	1871	1394	1479	951	1922		2717	156	156
8	Dhaka	Shaheed Ahsan Ullah Master General Hospital Tongi	Gazipur	2020	March	351	153	315	189	185	319		454	50	50
9	Dhaka	Kurmitola General Hospital Kurmitola Dhaka	Dhaka	2020	March
10	Dhaka	Sadar Hospital Shariatpur	Shariatpur	2020	March	227	143	169	201	172	198	36	255	69	3	0
11	Dhaka	Sadar Hospital Narsingdi	Narshingdi	2020	March	250	100	170	180	149	201	0	216	134	19	0
12	Dhaka	Civil Surgeon Office Faridpur	Faridpur	2020	March	91	49	84	56	49	91	0	122	18	27	0
13	Dhaka	General Hospital Munshiganj	Munshiganj	2020	March	140	95	125	110	120	115	0	200	35	34
14	Dhaka	General Hospital Narayanganj	Narayanganj	2020	March
15	Dhaka	Sadar Hospital Rajbari	Rajbari	2020	March
16	Mymensing	Mymesing Medical College hospital Mymensing	Mymensingh	2020	March	461	474	491	444	234	701	0	683	252	212	0
17	Mymensing	Adhunik Sadar Hospital Netrokona	Netrakona	2020	March	161	145	162	144	147	159	0	296	10	6	0
18	Mymensing	Zila Hospital Sherpur	Sherpur	2020	March	56	236	192	100	105	187	50	235	7	0	0
19	Mymensing	250 Bed General Hospital Jamalpur	Jamalpur	2020	March	122	185	200	107	190	117		290	17	15	0
20	Chittagong	250 Bed Zila Sadar Hospital Brahmanbaria	Brahamanbaria	2020	March
21	Chittagong	250 Bed General Hospital Chandpur	Chandpur	2020	March
22	Chittagong	BITID Chittagong	Chittagong	2020	March	173	76	164	85	94	155		139	110		1
23	Chittagong	General Hospital Comilla	Comilla	2020	March
24	Chittagong	250 Bed General Hospital Cox’s Bazar	Cox'S Bazar	2020	March	196	142	205	113	159	179	311	27	27	27
25	Chittagong	250 Bed General Hospital Feni	Feni	2020	March
26	Chittagong	Adhunik General Hospital Khagrachari Hilly Zila Khagrachari	Khagrachhari	2020	March
27	Chittagong	Sadar Hospital Lakshmipur	Lakshmipur	2020	March
28	Chittagong	250 Bed General Hospital Noakhali	Noakhali	2020	March
29	Chittagong	General Hospital Rangamati	Rangamati	2020	March	58	24	66	19	12	70	5	74	3	3	0
30	Chittagong	250 Bed General Hospital Chittagong	Chittagong	2020	March
31	Chittagong	Civil Surgeon Office Bandarban Hilly Zila Bandarban	Bandarban	2020	March
32	Sylhet	Sylhet Shaheed Shamsuddin Ahmed Hospital Sylhet	Sylhet	2020	March	88	101	115	74	82	107	0	149	40	56
33	Sylhet	Adhunik Zila Sadar Hospital Habiganj	Habiganj	2020	March	0	0	0	0	0	0	0	0	0	0	0
34	Sylhet	250 Bed Zila Sadar Hospital Sunamganj	Sunamganj	2020	March	71	64	76	59	53	82	13	97	25	21	0
35	Sylhet	250 Bed Zila Sadar Hospital Moulvibazar	Maulvibazar	2020	March	100	50	80	70	90	60	25	90	35	150	0
36	Barisal	100 Bed Zila Sadar Hospital Barguna	Barguna	2020	March	200	280	190	290	220	260	100	490	75	40
37	Barisal	General Hospital Barisal	Barisal	2020	March	236	405	349	292	227	414		623	18	25
38	Barisal	Sdar Hospital Jhalokahti	Jhalokati	2020	March	72	260	138	194	88	244		313	19	10
39	Barisal	250 Bed Hospital patuakhali	Patuakhali	2020	March	91	176	117	150	127	140		260	7	15	0
40	Barisal	Sadar Hospital Pirojpur	Pirojpur	2020	March	100	241	140	201	92	249	0	330	11	23
41	Barisal	Sadar Hospital Bhola	Bhola	2020	March	224	239	139	324	204	259	11	452	0	10	0
42	Rangpur	250 Bed Zila Sadar Hospital Dinajpur	Dinajpur	2020	March
43	Rangpur	Zila Sdar Hopital Gaibandha	Gaibandha	2020	March	200	185	280	100	285	100	5	370	10		0
44	Rangpur	General Hospital Kurigram	Kurigram	2020	March	170	152	139	183	125	197		262	60	35
45	Rangpur	100 Bed Sadar Hospital Lalmonirhat	Lalmonirhat	2020	March	230	133	208	155	107	256		287	76	142
46	Rangpur	Adunik Sadar Hospital Nilphamari	Nilphamari	2020	March	301	435	381	355	250	486	15	733	3	5
47	Rangpur	Civil Surgeon Office Rangpur	Rangpur	2020	March
48	Rangpur	Sadar Hospital Panchagarh	Panchagarh	2020	March	60	188	100	148	74	174	0	245	3	0	0
49	Rangpur	Adhunik Sadar Hospital Thakurgaon	Thakurgaon	2020	March	179	190	258	111	120	249	10	180	179	65	0
50	Rajshahi	Rajshahi Medcial College Hospital	Rajshahi	2020	March	343	97			116	324	101	164	175	182
51	Rajshahi	Sadar Hospital Chapinawabganj	Nawabganj	2020	March
52	Rajshahi	250 Bed General Hospital Pabna	Pabna	2020	March	50	28	50	28	30	48	0	71	7	2
53	Rajshahi	250 Bed Mohammad Ali Zila Hospital Bogra	Bogra	2020	March
54	Rajshahi	Adhunik Zila Hospital Joypurhat	Joypurhat	2020	March	790	410	800	400	900	300	400	600	200	86	0
55	Rajshahi	100 Bed Zila Sadar Hospital Naogaon	Naogaon	2020	March	165	77	136	97	70	163	0	208	25	25	0
56	Rajshahi	Adhunik Sadar Hospital Natore	Natore	2020	March	220	127	220	127	127	127	0	220	2	4	0
57	Rajshahi	General Hospital Sirajganj	Sirajganj	2020	March	53	25	51	27	22	56			78	160
58	Khulna	General Hospital Khulna	Khulna	2020	March	268	352	305	315	187	433		618	2	2
59	Khulna	Sadar Hospital Bagerhat	Bagerhat	2020	March	75	184	72	187	64	195	0	228	31	31	0
60	Khulna	Sadar Hospital Cuadanga	Chuadanga	2020	March	254	134	256	132	98	290	0	263	125	31	0
61	Khulna	250 Bed General Hospital Jessore	Jessore	2020	March	391	500	582	309	115	776	0	859	32	0	0
62	Khulna	Sadar Hospital Jhenaidah	Jhenaidah	2020	March	297	68	155	210	105	260	0	360	5	5	0
63	Khulna	250 Bed General Hospital Kustia	Kushtia	2020	March	339	298	339	298	410	227	187	215	135	0	0
64	Khulna	250 Bed General Hospital Magura	Magura	2020	March	129	151	137	143	92	188	6	176	98	14
65	Khulna	250 Bed General Hospital Meherpur	Meherpur	2020	March	171	76	76	171	171	76	0	181	66	128
66	Khulna	Sadar Hospital Narail	Narail	2020	March	85	44	74	55	42	87	26	97	6	0	0
67	Khulna	Sadar Hospital Satkhira	Satkhira	2020	March	225	165	150	240	110	280		373	17	17
68	Khulna	moniram	Jessore	2020	March	0	0	0	0	0	0	0	0	0	0	0
1	Dhaka	Infectious Disease Hospital (IDH)	Dhaka	2020	April	1565	642	1254	953	746	1461		1223	984		2
2	Dhaka	Civil Surgeon Office, Gopalganj	Gopalganj	2020	April
3	Dhaka	Shaheed Tajuddin Ahmed Medical College Hospital Gazipur	Gazipur	2020	April
4	Dhaka	250 Bed General Hospital Kishoreganj	Kishoreganj	2020	April	180	64	140	104	96	148	0	233	12	20	0
5	Dhaka	Sadar Hospital Madaripur	Madaripur	2020	April	86	84	81	89	68	102	0	106	64	0	0
6	Dhaka	250 Bed General Hospital Manikganj	Manikganj	2020	April	529	374	512	391	395	508	1	103	799	12	0
7	Dhaka	250 Bed General Hospital Tangail	Tangail	2020	April	453	826	748	531	365	914		1222	57	34
8	Dhaka	Shaheed Ahsan Ullah Master General Hospital Tongi	Gazipur	2020	April	263	102	198	167	100	265		295	70	65
9	Dhaka	Kurmitola General Hospital Kurmitola Dhaka	Dhaka	2020	April
10	Dhaka	Sadar Hospital Shariatpur	Shariatpur	2020	April	71	65	45	91	58	78	7	116	13	2	0
11	Dhaka	Sadar Hospital Narsingdi	Narshingdi	2020	April	100	30	55	75	48	82	0	78	52	5	0
12	Dhaka	Civil Surgeon Office Faridpur	Faridpur	2020	April	52	43	57	38	32	63	0	73	22	33	0
13	Dhaka	General Hospital Munshiganj	Munshiganj	2020	April	85	60	80	65	70	75	0	123	22	22
14	Dhaka	General Hospital Narayanganj	Narayanganj	2020	April
15	Dhaka	Sadar Hospital Rajbari	Rajbari	2020	April
16	Mymensing	Mymesing Medical College hospital Mymensing	Mymensingh	2020	April	111	139	134	116	72	178	0	201	49	0	0
17	Mymensing	Adhunik Sadar Hospital Netrokona	Netrakona	2020	April	92	79	101	70	41	130	0	166	5	3	0
18	Mymensing	Zila Hospital Sherpur	Sherpur	2020	April	57	58	85	30	35	80	40	70	5	0	0
19	Mymensing	250 Bed General Hospital Jamalpur	Jamalpur	2020	April	150	175	225	100	200	125		300	25	20	0
20	Chittagong	250 Bed Zila Sadar Hospital Brahmanbaria	Brahamanbaria	2020	April
21	Chittagong	250 Bed General Hospital Chandpur	Chandpur	2020	April
22	Chittagong	BITID Chittagong	Chittagong	2020	April	66	21	62	25	24	63		41	46
23	Chittagong	General Hospital Comilla	Comilla	2020	April
24	Chittagong	250 Bed General Hospital Cox’s Bazar	Cox'S Bazar	2020	April	99	49	92	56	63	85	133	15	13	13
25	Chittagong	250 Bed General Hospital Feni	Feni	2020	April
26	Chittagong	Adhunik General Hospital Khagrachari Hilly Zila Khagrachari	Khagrachhari	2020	April
27	Chittagong	Sadar Hospital Lakshmipur	Lakshmipur	2020	April
28	Chittagong	250 Bed General Hospital Noakhali	Noakhali	2020	April
29	Chittagong	General Hospital Rangamati	Rangamati	2020	April	0	0	0	0	0	0	0	0	0	0	0
30	Chittagong	250 Bed General Hospital Chittagong	Chittagong	2020	April
31	Chittagong	Civil Surgeon Office Bandarban Hilly Zila Bandarban	Bandarban	2020	April
32	Sylhet	Sylhet Shaheed Shamsuddin Ahmed Hospital Sylhet	Sylhet	2020	April	31	37	41	27	28	40	0	56	12	14
33	Sylhet	Adhunik Zila Sadar Hospital Habiganj	Habiganj	2020	April	0	0	0	0	0	0	0	0	0	0	0
34	Sylhet	250 Bed Zila Sadar Hospital Sunamganj	Sunamganj	2020	April	35	18	34	19	21	32	12	30	11	0	0
35	Sylhet	250 Bed Zila Sadar Hospital Moulvibazar	Maulvibazar	2020	April	35	15	25	25	10	40	10	30	10	50	0
36	Barisal	100 Bed Zila Sadar Hospital Barguna	Barguna	2020	April	100	161	101	260	111	250	110	370	70	50
37	Barisal	General Hospital Barisal	Barisal	2020	April	97	168	142	123	80	185		253	12	17
38	Barisal	Sdar Hospital Jhalokahti	Jhalokati	2020	April	58	115	92	81	46	127		144	29	16
39	Barisal	250 Bed Hospital patuakhali	Patuakhali	2020	April	18	50	28	40	28	40		63	5	10	0
40	Barisal	Sadar Hospital Pirojpur	Pirojpur	2020	April	52	134	75	111	64	122	0	180	6	13
41	Barisal	Sadar Hospital Bhola	Bhola	2020	April	138	176	114	200	113	201	7	302	5	0	0
42	Rangpur	250 Bed Zila Sadar Hospital Dinajpur	Dinajpur	2020	April
43	Rangpur	Zila Sdar Hopital Gaibandha	Gaibandha	2020	April	100	70	90	80	100	70	5	155	10		0
44	Rangpur	General Hospital Kurigram	Kurigram	2020	April	84	102	104	82	62	124		146	40	28
45	Rangpur	100 Bed Sadar Hospital Lalmonirhat	Lalmonirhat	2020	April	94	79	108	65	36	137		129	44	28
46	Rangpur	Adunik Sadar Hospital Nilphamari	Nilphamari	2020	April	130	207	198	139	114	223	12	337
47	Rangpur	Civil Surgeon Office Rangpur	Rangpur	2020	April
48	Rangpur	Sadar Hospital Panchagarh	Panchagarh	2020	April	34	115	69	80	48	101	0	144	5	0	0
49	Rangpur	Adhunik Sadar Hospital Thakurgaon	Thakurgaon	2020	April	67	90	88	69	40	117	2	125	30	20	0
50	Rajshahi	Rajshahi Medcial College Hospital	Rajshahi	2020	April	207	108			92	223	95	68	152	160
51	Rajshahi	Sadar Hospital Chapinawabganj	Nawabganj	2020	April
52	Rajshahi	250 Bed General Hospital Pabna	Pabna	2020	April	45	38	47	36	28	55	0	59	24	8
53	Rajshahi	250 Bed Mohammad Ali Zila Hospital Bogra	Bogra	2020	April
54	Rajshahi	Adhunik Zila Hospital Joypurhat	Joypurhat	2020	April	0	0	0	0	0	0	0	0	0	0	0
55	Rajshahi	100 Bed Zila Sadar Hospital Naogaon	Naogaon	2020	April	59	44	60	43	25	78	0	100	3	3	0
56	Rajshahi	Adhunik Sadar Hospital Natore	Natore	2020	April	103	51	103	51	51	51	0	103	1	2	0
57	Rajshahi	General Hospital Sirajganj	Sirajganj	2020	April	12	3	10	5	4	11			15	30
58	Khulna	General Hospital Khulna	Khulna	2020	April	119	135	129	125	72	182		252	2	2
59	Khulna	Sadar Hospital Bagerhat	Bagerhat	2020	April	27	88	58	57	33	82	0	104	11	11	0
60	Khulna	Sadar Hospital Cuadanga	Chuadanga	2020	April	124	46	108	62	47	123	0	113	57	11	0
61	Khulna	250 Bed General Hospital Jessore	Jessore	2020	April	199	239	233	205	121	317	0	433	5	0	0
62	Khulna	Sadar Hospital Jhenaidah	Jhenaidah	2020	April	93	27	39	81	43	77	0	120	0	0	0
63	Khulna	250 Bed General Hospital Kustia	Kushtia	2020	April	200	116	162	154	125	191	145	107	64	0	0
64	Khulna	250 Bed General Hospital Magura	Magura	2020	April	72	62	81	53	28	106	1	91	42	1
65	Khulna	250 Bed General Hospital Meherpur	Meherpur	2020	April	110	40	40	110	110	40	0	110	40
66	Khulna	Sadar Hospital Narail	Narail	2020	April	28	26	31	23	15	39	13	38	3	0	0
67	Khulna	Sadar Hospital Satkhira	Satkhira	2020	April	143	75	70	148	98	120		201	17	17
68	Khulna	moniram	Jessore	2020	April	0	0	0	0	0	0	0	0	0	0	0
1	Dhaka	Infectious Disease Hospital (IDH)	Dhaka	2020	May	1928	843	1546	1225	845	1926		1550	1221		1
2	Dhaka	Civil Surgeon Office, Gopalganj	Gopalganj	2020	May
3	Dhaka	Shaheed Tajuddin Ahmed Medical College Hospital Gazipur	Gazipur	2020	May
4	Dhaka	250 Bed General Hospital Kishoreganj	Kishoreganj	2020	May	239	93	182	150	107	225	0	312	20	34	0
5	Dhaka	Sadar Hospital Madaripur	Madaripur	2020	May	80	90	74	96	58	112	0	115	55	0	0
6	Dhaka	250 Bed General Hospital Manikganj	Manikganj	2020	May	720	474	622	572	562	632	2	105	1087	15	0
7	Dhaka	250 Bed General Hospital Tangail	Tangail	2020	May	354	529	458	425	246	637		813	70	43
8	Dhaka	Shaheed Ahsan Ullah Master General Hospital Tongi	Gazipur	2020	May	339	122	265	196	225	236		406	55
9	Dhaka	Kurmitola General Hospital Kurmitola Dhaka	Dhaka	2020	May
10	Dhaka	Sadar Hospital Shariatpur	Shariatpur	2020	May	67	66	48	85	52	81	2	119	12	2	0
11	Dhaka	Sadar Hospital Narsingdi	Narshingdi	2020	May	128	51	71	108	79	100	0	114	65	8	0
12	Dhaka	Civil Surgeon Office Faridpur	Faridpur	2020	May	85	50	81	54	54	81	0	114	21	32	0
13	Dhaka	General Hospital Munshiganj	Munshiganj	2020	May	87	48	77	58	72	63	0	122	13	13
14	Dhaka	General Hospital Narayanganj	Narayanganj	2020	May
15	Dhaka	Sadar Hospital Rajbari	Rajbari	2020	May
16	Mymensing	Mymesing Medical College hospital Mymensing	Mymensingh	2020	May	150	118	147	121	104	164	0	197	71	0	0
17	Mymensing	Adhunik Sadar Hospital Netrokona	Netrakona	2020	May	53	45	41	57	35	63	0	96	2	0	0
18	Mymensing	Zila Hospital Sherpur	Sherpur	2020	May	29	57	56	30	28	58	22	57	7	0	0
19	Mymensing	250 Bed General Hospital Jamalpur	Jamalpur	2020	May	59	88	100	47	90	57		127	20	20	0
20	Chittagong	250 Bed Zila Sadar Hospital Brahmanbaria	Brahamanbaria	2020	May
21	Chittagong	250 Bed General Hospital Chandpur	Chandpur	2020	May
22	Chittagong	BITID Chittagong	Chittagong	2020	May	64	16	52	28	34	46		46	34		1
23	Chittagong	General Hospital Comilla	Comilla	2020	May
24	Chittagong	250 Bed General Hospital Cox’s Bazar	Cox'S Bazar	2020	May	105	57	162	93	69	60	147	15	15	15
25	Chittagong	250 Bed General Hospital Feni	Feni	2020	May
26	Chittagong	Adhunik General Hospital Khagrachari Hilly Zila Khagrachari	Khagrachhari	2020	May
27	Chittagong	Sadar Hospital Lakshmipur	Lakshmipur	2020	May
28	Chittagong	250 Bed General Hospital Noakhali	Noakhali	2020	May
29	Chittagong	General Hospital Rangamati	Rangamati	2020	May	0	0	0	0	0	0	0	0	0	0	0
30	Chittagong	250 Bed General Hospital Chittagong	Chittagong	2020	May
31	Chittagong	Civil Surgeon Office Bandarban Hilly Zila Bandarban	Bandarban	2020	May
32	Sylhet	Sylhet Shaheed Shamsuddin Ahmed Hospital Sylhet	Sylhet	2020	May	35	21	42	14	25	31	0	56	0	0
33	Sylhet	Adhunik Zila Sadar Hospital Habiganj	Habiganj	2020	May	0	0	0	0	0	0	0	0	0	0	0
34	Sylhet	250 Bed Zila Sadar Hospital Sunamganj	Sunamganj	2020	May	42	39	49	32	20	61	8	52	21	9	0
35	Sylhet	250 Bed Zila Sadar Hospital Moulvibazar	Maulvibazar	2020	May	10	10	7	13	5	15	3	15	2	20	0
36	Barisal	100 Bed Zila Sadar Hospital Barguna	Barguna	2020	May	102	180	100	182	100	182	150	500	80	20
37	Barisal	General Hospital Barisal	Barisal	2020	May	106	229	196	139	106	229		332	3	2
38	Barisal	Sdar Hospital Jhalokahti	Jhalokati	2020	May	51	126	96	81	50	123		139	38	17
39	Barisal	250 Bed Hospital patuakhali	Patuakhali	2020	May	27	58	40	45	40	45		85	0	0	0
40	Barisal	Sadar Hospital Pirojpur	Pirojpur	2020	May	37	115	66	86	56	96	0	144	8	19
41	Barisal	Sadar Hospital Bhola	Bhola	2020	May	32	274	106	200	79	227	5	301	0	0	0
42	Rangpur	250 Bed Zila Sadar Hospital Dinajpur	Dinajpur	2020	May
43	Rangpur	Zila Sdar Hopital Gaibandha	Gaibandha	2020	May	120	85	110	95	105	100	5	185	15		0
44	Rangpur	General Hospital Kurigram	Kurigram	2020	May	88	76	89	75	90	74		129	35	22
45	Rangpur	100 Bed Sadar Hospital Lalmonirhat	Lalmonirhat	2020	May	122	94	129	87	60	156		175	41	27
46	Rangpur	Adunik Sadar Hospital Nilphamari	Nilphamari	2020	May	114	168	162	120	78	204	10	282
47	Rangpur	Civil Surgeon Office Rangpur	Rangpur	2020	May
48	Rangpur	Sadar Hospital Panchagarh	Panchagarh	2020	May	37	126	63	100	54	109	0	159	4	0	0
49	Rangpur	Adhunik Sadar Hospital Thakurgaon	Thakurgaon	2020	May	64	88	79	73	48	104	3	129	20	8	0
50	Rajshahi	Rajshahi Medcial College Hospital	Rajshahi	2020	May	103	72			61	114	42	61	72	73
51	Rajshahi	Sadar Hospital Chapinawabganj	Nawabganj	2020	May
52	Rajshahi	250 Bed General Hospital Pabna	Pabna	2020	May	68	35	60	43	27	76	0	73	30	10
53	Rajshahi	250 Bed Mohammad Ali Zila Hospital Bogra	Bogra	2020	May
54	Rajshahi	Adhunik Zila Hospital Joypurhat	Joypurhat	2020	May	0	0	0	0	0	0	0	0	0	0	0
55	Rajshahi	100 Bed Zila Sadar Hospital Naogaon	Naogaon	2020	May	42	26	38	30	20	48	0	66	2	2	0
56	Rajshahi	Adhunik Sadar Hospital Natore	Natore	2020	May	121	64	121	64	64	64	0	121	1	2	0
57	Rajshahi	General Hospital Sirajganj	Sirajganj	2020	May	14	4	11	7	6	12			18	37
58	Khulna	General Hospital Khulna	Khulna	2020	May	138	156	154	140	94	200		290	4	4
59	Khulna	Sadar Hospital Bagerhat	Bagerhat	2020	May	36	121	72	85	38	119	0	125	32	32	0
60	Khulna	Sadar Hospital Cuadanga	Chuadanga	2020	May	150	51	156	45	53	148	0	117	84	13	0
61	Khulna	250 Bed General Hospital Jessore	Jessore	2020	May	204	269	276	197	201	272	0	462	11	0	0
62	Khulna	Sadar Hospital Jhenaidah	Jhenaidah	2020	May	88	27	49	66	31	84	0	115	0	0	0
63	Khulna	250 Bed General Hospital Kustia	Kushtia	2020	May	175	189	207	157	190	174	175	110	364	0	0
64	Khulna	250 Bed General Hospital Magura	Magura	2020	May	64	64	77	51	46	82	2	81	45	7
65	Khulna	250 Bed General Hospital Meherpur	Meherpur	2020	May	107	36	30	113	113	30	0	110	33
66	Khulna	Sadar Hospital Narail	Narail	2020	May	28	6	20	14	14	20	7	23	4	0	0
67	Khulna	Sadar Hospital Satkhira	Satkhira	2020	May	115	75	60	130	80	110		178	12	12
68	Khulna	moniram	Jessore	2020	May	0	0	0	0	0	0	0	0	0	0	0
1	Dhaka	Infectious Disease Hospital (IDH)	Dhaka	2020	June	2684	939	2054	1569	948	2675		2437	1186		1
2	Dhaka	Civil Surgeon Office, Gopalganj	Gopalganj	2020	June
3	Dhaka	Shaheed Tajuddin Ahmed Medical College Hospital Gazipur	Gazipur	2020	June
4	Dhaka	250 Bed General Hospital Kishoreganj	Kishoreganj	2020	June	300	109	209	200	120	409	0	394	15	22	0
5	Dhaka	Sadar Hospital Madaripur	Madaripur	2020	June	90	95	92	93	78	107	0	105	80	0	0
6	Dhaka	250 Bed General Hospital Manikganj	Manikganj	2020	June	891	585	814	662	674	802	2	138	1336	38	0
7	Dhaka	250 Bed General Hospital Tangail	Tangail	2020	June	341	744	451	634	337	748		991	94	67
8	Dhaka	Shaheed Ahsan Ullah Master General Hospital Tongi	Gazipur	2020	June	371	120	295	196	201	290		480	11
9	Dhaka	Kurmitola General Hospital Kurmitola Dhaka	Dhaka	2020	June
10	Dhaka	Sadar Hospital Shariatpur	Shariatpur	2020	June	58	70	39	89	41	87	19	100	9	5	0
11	Dhaka	Sadar Hospital Narsingdi	Narshingdi	2020	June	113	62	75	100	67	108	0	128	47	5	0
12	Dhaka	Civil Surgeon Office Faridpur	Faridpur	2020	June	123	62	111	74	62	123	0	133	52	78	0
13	Dhaka	General Hospital Munshiganj	Munshiganj	2020	June	260	85	182	163	175	170	0	305	40	40
14	Dhaka	General Hospital Narayanganj	Narayanganj	2020	June
15	Dhaka	Sadar Hospital Rajbari	Rajbari	2020	June
16	Mymensing	Mymesing Medical College hospital Mymensing	Mymensingh	2020	June	232	156	169	219	130	284	0	308	80	0	0
17	Mymensing	Adhunik Sadar Hospital Netrokona	Netrakona	2020	June	86	66	91	61	52	100	0	145	7	2	0
18	Mymensing	Zila Hospital Sherpur	Sherpur	2020	June	72	99	127	44	60	111	52	109	10	0	0
19	Mymensing	250 Bed General Hospital Jamalpur	Jamalpur	2020	June	73	98	100	71	120	51		151	20	20	0
20	Chittagong	250 Bed Zila Sadar Hospital Brahmanbaria	Brahamanbaria	2020	June
21	Chittagong	250 Bed General Hospital Chandpur	Chandpur	2020	June
22	Chittagong	BITID Chittagong	Chittagong	2020	June	87	23	73	37	37	73		75	35		1
23	Chittagong	General Hospital Comilla	Comilla	2020	June
24	Chittagong	250 Bed General Hospital Cox’s Bazar	Cox'S Bazar	2020	June	100	67	98	69	69	98	156	11	11	11
25	Chittagong	250 Bed General Hospital Feni	Feni	2020	June
26	Chittagong	Adhunik General Hospital Khagrachari Hilly Zila Khagrachari	Khagrachhari	2020	June
27	Chittagong	Sadar Hospital Lakshmipur	Lakshmipur	2020	June
28	Chittagong	250 Bed General Hospital Noakhali	Noakhali	2020	June
29	Chittagong	General Hospital Rangamati	Rangamati	2020	June	22	13	26	9	5	30	2	33	0	0	0
30	Chittagong	250 Bed General Hospital Chittagong	Chittagong	2020	June
31	Chittagong	Civil Surgeon Office Bandarban Hilly Zila Bandarban	Bandarban	2020	June
32	Sylhet	Sylhet Shaheed Shamsuddin Ahmed Hospital Sylhet	Sylhet	2020	June	27	18	28	17	18	27	0	45	0	0
33	Sylhet	Adhunik Zila Sadar Hospital Habiganj	Habiganj	2020	June	0	0	0	0	0	0	0	0	0	0	0
34	Sylhet	250 Bed Zila Sadar Hospital Sunamganj	Sunamganj	2020	June	58	30	60	28	57	31	6	59	23	0	0
35	Sylhet	250 Bed Zila Sadar Hospital Moulvibazar	Maulvibazar	2020	June	35	15	15	35	20	30	10	20	10	50	0
36	Barisal	100 Bed Zila Sadar Hospital Barguna	Barguna	2020	June	114	200	114	200	100	214	140	450	75	40
37	Barisal	General Hospital Barisal	Barisal	2020	June	75	260	164	171	108	227		335
38	Barisal	Sdar Hospital Jhalokahti	Jhalokati	2020	June	29	254	98	186	74	209		264	19	4
39	Barisal	250 Bed Hospital patuakhali	Patuakhali	2020	June	22	50	40	32	32	40		71	1	2	0
40	Barisal	Sadar Hospital Pirojpur	Pirojpur	2020	June	30	148	65	113	41	137	0	170	8	20
41	Barisal	Sadar Hospital Bhola	Bhola	2020	June	63	90	47	106	37	116	0	153	0	0	0
42	Rangpur	250 Bed Zila Sadar Hospital Dinajpur	Dinajpur	2020	June
43	Rangpur	Zila Sdar Hopital Gaibandha	Gaibandha	2020	June	125	100	115	110	125	100	5	205	15		0
44	Rangpur	General Hospital Kurigram	Kurigram	2020	June	86	114	79	121	95	105		145	55	40
45	Rangpur	100 Bed Sadar Hospital Lalmonirhat	Lalmonirhat	2020	June	144	115	155	104	77	182		194	65	47
46	Rangpur	Adunik Sadar Hospital Nilphamari	Nilphamari	2020	June	165	254	220	199	123	296	17	419
47	Rangpur	Civil Surgeon Office Rangpur	Rangpur	2020	June
48	Rangpur	Sadar Hospital Panchagarh	Panchagarh	2020	June	57	146	90	113	93	110	0	194	9	0	0
49	Rangpur	Adhunik Sadar Hospital Thakurgaon	Thakurgaon	2020	June	84	106	103	87	58	132	0	175	15	13	0
50	Rajshahi	Rajshahi Medcial College Hospital	Rajshahi	2020	June	235	80			67	248	93	78	144	144
51	Rajshahi	Sadar Hospital Chapinawabganj	Nawabganj	2020	June
52	Rajshahi	250 Bed General Hospital Pabna	Pabna	2020	June	64	46	63	47	35	75	0	85	25	15
53	Rajshahi	250 Bed Mohammad Ali Zila Hospital Bogra	Bogra	2020	June
54	Rajshahi	Adhunik Zila Hospital Joypurhat	Joypurhat	2020	June	0	0	0	0	0	0	0	0	0	0	0
55	Rajshahi	100 Bed Zila Sadar Hospital Naogaon	Naogaon	2020	June	32	27	35	24	15	44	0	59	0	0	0
56	Rajshahi	Adhunik Sadar Hospital Natore	Natore	2020	June	155	66	155	66	66	66	0	155	1	2	0
57	Rajshahi	General Hospital Sirajganj	Sirajganj	2020	June	20	7	19	8	9	18			27	48
58	Khulna	General Hospital Khulna	Khulna	2020	June	128	156	156	128	91	193		290	4	4
59	Khulna	Sadar Hospital Bagerhat	Bagerhat	2020	June	40	85	67	58	36	89	0	103	22	22	0
60	Khulna	Sadar Hospital Cuadanga	Chuadanga	2020	June	147	91	152	86	84	154	0	153	85	17	0
61	Khulna	250 Bed General Hospital Jessore	Jessore	2020	June	218	372	301	289	197	393	0	571	19	0	0
62	Khulna	Sadar Hospital Jhenaidah	Jhenaidah	2020	June	357	171	171	357	141	387	0	528	0	0	0
63	Khulna	250 Bed General Hospital Kustia	Kushtia	2020	June	162	138	158	142	155	145	148	102	50	0	0
64	Khulna	250 Bed General Hospital Magura	Magura	2020	June	61	63	76	48	39	85	4	85	35	4
65	Khulna	250 Bed General Hospital Meherpur	Meherpur	2020	June	122	54	64	112	102	74	0	102	74
66	Khulna	Sadar Hospital Narail	Narail	2020	June	42	18	38	22	21	39	17	38	5	0	0
67	Khulna	Sadar Hospital Satkhira	Satkhira	2020	June	130	105	87	148	95	150		226	9	9
68	Khulna	moniram	Jessore	2020	June	0	0	0	0	0	0	0	0	0	0	0
1	Dhaka	Infectious Disease Hospital (IDH)	Dhaka	2020	July	2704	1489	2754	1439	1024	3169		2748	1445		1
2	Dhaka	Civil Surgeon Office, Gopalganj	Gopalganj	2020	July
3	Dhaka	Shaheed Tajuddin Ahmed Medical College Hospital Gazipur	Gazipur	2020	July
4	Dhaka	250 Bed General Hospital Kishoreganj	Kishoreganj	2020	July	295	155	230	220	134	316	0	385	24	37	0
5	Dhaka	Sadar Hospital Madaripur	Madaripur	2020	July	114	111	105	120	87	138	0	145	80	0	0
6	Dhaka	250 Bed General Hospital Manikganj	Manikganj	2020	July	936	546	822	660	654	828	3	245	1234	52	0
7	Dhaka	250 Bed General Hospital Tangail	Tangail	2020	July	357	942	655	644	454	845		1191	108	59
8	Dhaka	Shaheed Ahsan Ullah Master General Hospital Tongi	Gazipur	2020	July	269	110	195	184	120	259		350	29
9	Dhaka	Kurmitola General Hospital Kurmitola Dhaka	Dhaka	2020	July
10	Dhaka	Sadar Hospital Shariatpur	Shariatpur	2020	July	58	76	42	130	85	87	0	175	25	7	0
11	Dhaka	Sadar Hospital Narsingdi	Narshingdi	2020	July	100	80	68	112	57	123	0	125	55	7	0
12	Dhaka	Civil Surgeon Office Faridpur	Faridpur	2020	July	70	48	70	48	52	66	0	76	42	63	0
13	Dhaka	General Hospital Munshiganj	Munshiganj	2020	July	105	90	100	95	107	88	0	177	18	18
14	Dhaka	General Hospital Narayanganj	Narayanganj	2020	July
15	Dhaka	Sadar Hospital Rajbari	Rajbari	2020	July
16	Mymensing	Mymesing Medical College hospital Mymensing	Mymensingh	2020	July	325	187	301	211	130	382	0	402	110	0	0
17	Mymensing	Adhunik Sadar Hospital Netrokona	Netrakona	2020	July	130	80	134	76	92	118	0	203	7	3	0
18	Mymensing	Zila Hospital Sherpur	Sherpur	2020	July	73	157	160	70	60	170	19	187	24	0	0
19	Mymensing	250 Bed General Hospital Jamalpur	Jamalpur	2020	July	117	153	170	100	170	100		250	20	20	0
20	Chittagong	250 Bed Zila Sadar Hospital Brahmanbaria	Brahamanbaria	2020	July
21	Chittagong	250 Bed General Hospital Chandpur	Chandpur	2020	July
22	Chittagong	BITID Chittagong	Chittagong	2020	July	77	34	80	31	39	72		71	40
23	Chittagong	General Hospital Comilla	Comilla	2020	July
24	Chittagong	250 Bed General Hospital Cox’s Bazar	Cox'S Bazar	2020	July	151	81	134	98	119	113	196	36	33	33
25	Chittagong	250 Bed General Hospital Feni	Feni	2020	July
26	Chittagong	Adhunik General Hospital Khagrachari Hilly Zila Khagrachari	Khagrachhari	2020	July
27	Chittagong	Sadar Hospital Lakshmipur	Lakshmipur	2020	July
28	Chittagong	250 Bed General Hospital Noakhali	Noakhali	2020	July
29	Chittagong	General Hospital Rangamati	Rangamati	2020	July	31	20	40	11	9	41	5	46	0	0	0
30	Chittagong	250 Bed General Hospital Chittagong	Chittagong	2020	July
31	Chittagong	Civil Surgeon Office Bandarban Hilly Zila Bandarban	Bandarban	2020	July
32	Sylhet	Sylhet Shaheed Shamsuddin Ahmed Hospital Sylhet	Sylhet	2020	July	50	27	51	26	38	39	0	77	0	0
33	Sylhet	Adhunik Zila Sadar Hospital Habiganj	Habiganj	2020	July	7	1	6	2	3	5	0	8	0	0	0
34	Sylhet	250 Bed Zila Sadar Hospital Sunamganj	Sunamganj	2020	July	36	56	56	36	41	51	1	74	17	0	0
35	Sylhet	250 Bed Zila Sadar Hospital Moulvibazar	Maulvibazar	2020	July	40	25	30	35	15	50	15	40	10	65	0
36	Barisal	100 Bed Zila Sadar Hospital Barguna	Barguna	2020	July	105	120	90	135	105	120	200	450	75	0
37	Barisal	General Hospital Barisal	Barisal	2020	July	106	279	198	187	132	253		382	3
38	Barisal	Sdar Hospital Jhalokahti	Jhalokati	2020	July	28	174	89	113	66	124		177	26	10
39	Barisal	250 Bed Hospital patuakhali	Patuakhali	2020	July	29	83	50	62	62	50		112	0	0	0
40	Barisal	Sadar Hospital Pirojpur	Pirojpur	2020	July	35	178	94	119	62	151	0	211	2	4
41	Barisal	Sadar Hospital Bhola	Bhola	2020	July	70	115	85	100	85	100	10	159	16	0	0
42	Rangpur	250 Bed Zila Sadar Hospital Dinajpur	Dinajpur	2020	July
43	Rangpur	Zila Sdar Hopital Gaibandha	Gaibandha	2020	July	180	100	180	100	200	80	10	175	15		0
44	Rangpur	General Hospital Kurigram	Kurigram	2020	July	64	98	102	60	65	97		132	30	28
45	Rangpur	100 Bed Sadar Hospital Lalmonirhat	Lalmonirhat	2020	July	144	115	155	104	77	182		194	65	47
46	Rangpur	Adunik Sadar Hospital Nilphamari	Nilphamari	2020	July	147	258	223	182	140	265	5	400	5
47	Rangpur	Civil Surgeon Office Rangpur	Rangpur	2020	July
48	Rangpur	Sadar Hospital Panchagarh	Panchagarh	2020	July	56	132	88	100	62	124	0	184	4	0	0
49	Rangpur	Adhunik Sadar Hospital Thakurgaon	Thakurgaon	2020	July	83	122	111	94	63	142	2	190	13	4	0
50	Rajshahi	Rajshahi Medcial College Hospital	Rajshahi	2020	July	204	96			94	206	99	94	107	107
51	Rajshahi	Sadar Hospital Chapinawabganj	Nawabganj	2020	July
52	Rajshahi	250 Bed General Hospital Pabna	Pabna	2020	July	76	59	73	62	51	86	0	85	50	17
53	Rajshahi	250 Bed Mohammad Ali Zila Hospital Bogra	Bogra	2020	July
54	Rajshahi	Adhunik Zila Hospital Joypurhat	Joypurhat	2020	July	0	0	0	0	0	0	0	0	0	0	0
55	Rajshahi	100 Bed Zila Sadar Hospital Naogaon	Naogaon	2020	July	53	60	70	83	28	85	0	110	3	3	0
56	Rajshahi	Adhunik Sadar Hospital Natore	Natore	2020	July	142	101	142	101	101	101	0	142	3	5	0
57	Rajshahi	General Hospital Sirajganj	Sirajganj	2020	July	21	8	20	9	10	19			29	49
58	Khulna	General Hospital Khulna	Khulna	2020	July	144	167	105	206	100	211		311	0	0
59	Khulna	Sadar Hospital Bagerhat	Bagerhat	2020	July	38	132	75	95	43	127	0	129	41	41	0
60	Khulna	Sadar Hospital Cuadanga	Chuadanga	2020	July	150	56	88	118	88	126	1	192	74	2	0
61	Khulna	250 Bed General Hospital Jessore	Jessore	2020	July	260	280	295	245	208	332	0	519	21	0	0
62	Khulna	Sadar Hospital Jhenaidah	Jhenaidah	2020	July	93	40	37	96	46	87	0	133	0	0	0
63	Khulna	250 Bed General Hospital Kustia	Kushtia	2020	July	105	113	121	97	125	93	30	105	83	0	0
64	Khulna	250 Bed General Hospital Magura	Magura	2020	July	50	67	72	45	41	76	0	80	37	8
65	Khulna	250 Bed General Hospital Meherpur	Meherpur	2020	July	101	54	11	144	144	11	0	144	11
66	Khulna	Sadar Hospital Narail	Narail	2020	July	39	26	37	28	24	41	30	35	0	0	0
67	Khulna	Sadar Hospital Satkhira	Satkhira	2020	July	109	78	100	87	80	107		174	13	13
68	Khulna	moniram	Jessore	2020	July	0	0	0	0	0	0	0	0	0	0	0
1	Dhaka	Infectious Disease Hospital (IDH)	Dhaka	2020	August	3266	1298	2897	1667	1351	3213		2946	1618		1
2	Dhaka	Civil Surgeon Office, Gopalganj	Gopalganj	2020	August
3	Dhaka	Shaheed Tajuddin Ahmed Medical College Hospital Gazipur	Gazipur	2020	August
4	Dhaka	250 Bed General Hospital Kishoreganj	Kishoreganj	2020	August	338	198	292	244	173	309	0	422	28	46	0
5	Dhaka	Sadar Hospital Madaripur	Madaripur	2020	August	166	115	130	151	104	177	0	180	101	0	0
6	Dhaka	250 Bed General Hospital Manikganj	Manikganj	2020	August	903	524	796	631	629	798	3	195	1229	70	0
7	Dhaka	250 Bed General Hospital Tangail	Tangail	2020	August	438	886	661	663	464	860		1182	142	55
8	Dhaka	Shaheed Ahsan Ullah Master General Hospital Tongi	Gazipur	2020	August	305	141	283	163	200	246		426	20
9	Dhaka	Kurmitola General Hospital Kurmitola Dhaka	Dhaka	2020	August
10	Dhaka	Sadar Hospital Shariatpur	Shariatpur	2020	August	65	79	77	67	40	104	0	125	18	18	0
11	Dhaka	Sadar Hospital Narsingdi	Narshingdi	2020	August	185	55	105	135	128	112	0	119	121	0	0
12	Dhaka	Civil Surgeon Office Faridpur	Faridpur	2020	August	87	53	84	56	60	80	0	72	68	102	0
13	Dhaka	General Hospital Munshiganj	Munshiganj	2020	August	108	77	95	90	90	95	0	158	27	27
14	Dhaka	General Hospital Narayanganj	Narayanganj	2020	August
15	Dhaka	Sadar Hospital Rajbari	Rajbari	2020	August
16	Mymensing	Mymesing Medical College hospital Mymensing	Mymensingh	2020	August	350	319	409	260	125	544	0	496	173	0	0
17	Mymensing	Adhunik Sadar Hospital Netrokona	Netrakona	2020	August	147	133	170	110	113	167	0	261	19	5	0
18	Mymensing	Zila Hospital Sherpur	Sherpur	2020	August	66	163	142	87	80	149	25	193	11	1	0
19	Mymensing	250 Bed General Hospital Jamalpur	Jamalpur	2020	August	129	191	200	120	180	140		300	20	20	0
20	Chittagong	250 Bed Zila Sadar Hospital Brahmanbaria	Brahamanbaria	2020	August
21	Chittagong	250 Bed General Hospital Chandpur	Chandpur	2020	August
22	Chittagong	BITID Chittagong	Chittagong	2020	August	98	53	110	41	70	81		102	49
23	Chittagong	General Hospital Comilla	Comilla	2020	August
24	Chittagong	250 Bed General Hospital Cox’s Bazar	Cox'S Bazar	2020	August	165	120	182	100	129	156	268	17	17	17
25	Chittagong	250 Bed General Hospital Feni	Feni	2020	August
26	Chittagong	Adhunik General Hospital Khagrachari Hilly Zila Khagrachari	Khagrachhari	2020	August
27	Chittagong	Sadar Hospital Lakshmipur	Lakshmipur	2020	August
28	Chittagong	250 Bed General Hospital Noakhali	Noakhali	2020	August
29	Chittagong	General Hospital Rangamati	Rangamati	2020	August	40	22	45	17	21	51	62	0	0	0	0
30	Chittagong	250 Bed General Hospital Chittagong	Chittagong	2020	August
31	Chittagong	Civil Surgeon Office Bandarban Hilly Zila Bandarban	Bandarban	2020	August
32	Sylhet	Sylhet Shaheed Shamsuddin Ahmed Hospital Sylhet	Sylhet	2020	August	48	49	70	27	53	44	0	97	0	0
33	Sylhet	Adhunik Zila Sadar Hospital Habiganj	Habiganj	2020	August	58	68	81	45	71	55	0	116	10	0	0
34	Sylhet	250 Bed Zila Sadar Hospital Sunamganj	Sunamganj	2020	August	57	68	74	51	60	65	4	81	40	0	0
35	Sylhet	250 Bed Zila Sadar Hospital Moulvibazar	Maulvibazar	2020	August	50	25	35	40	25	50	20	35	20	75	0
36	Barisal	100 Bed Zila Sadar Hospital Barguna	Barguna	2020	August	104	150	100	154	104	150	200	425	94	0
37	Barisal	General Hospital Barisal	Barisal	2020	August	94	325	204	215	141	278		415	4	3
38	Barisal	Sdar Hospital Jhalokahti	Jhalokati	2020	August	29	176	70	135	66	139		188	17	7
39	Barisal	250 Bed Hospital patuakhali	Patuakhali	2020	August	23	74	57	40	57	40		94	3	6	0
40	Barisal	Sadar Hospital Pirojpur	Pirojpur	2020	August	48	184	101	131	82	150	0	228	4	8
41	Barisal	Sadar Hospital Bhola	Bhola	2020	August	70	167	95	142	95	142	12	220	5	0	0
42	Rangpur	250 Bed Zila Sadar Hospital Dinajpur	Dinajpur	2020	August
43	Rangpur	Zila Sdar Hopital Gaibandha	Gaibandha	2020	August	200	145	145	205	200	145	10	315	20		0
44	Rangpur	General Hospital Kurigram	Kurigram	2020	August	70	90	85	75	60	100		135	25	22
45	Rangpur	100 Bed Sadar Hospital Lalmonirhat	Lalmonirhat	2020	August	150	105	154	101	84	171		191	64
46	Rangpur	Adunik Sadar Hospital Nilphamari	Nilphamari	2020	August	158	328	268	218	145	341	3	479	7
47	Rangpur	Civil Surgeon Office Rangpur	Rangpur	2020	August
48	Rangpur	Sadar Hospital Panchagarh	Panchagarh	2020	August	65	158	100	123	100	123	0	213	10	0	0
49	Rangpur	Adhunik Sadar Hospital Thakurgaon	Thakurgaon	2020	August	94	126	128	92	63	157	1	205	14	2	0
50	Rajshahi	Rajshahi Medcial College Hospital	Rajshahi	2020	August	105	86			55	136	72	41	191	78
51	Rajshahi	Sadar Hospital Chapinawabganj	Nawabganj	2020	August
52	Rajshahi	250 Bed General Hospital Pabna	Pabna	2020	August	80	69	88	61	62	87	0	101	48	18
53	Rajshahi	250 Bed Mohammad Ali Zila Hospital Bogra	Bogra	2020	August
54	Rajshahi	Adhunik Zila Hospital Joypurhat	Joypurhat	2020	August	300	200	250	250	300	200	180	300	100	65	0
55	Rajshahi	100 Bed Zila Sadar Hospital Naogaon	Naogaon	2020	August	92	70	97	65	35	127	0	155	7	7	0
56	Rajshahi	Adhunik Sadar Hospital Natore	Natore	2020	August	145	123	145	123	123	123	0	145	3	9	0
57	Rajshahi	General Hospital Sirajganj	Sirajganj	2020	August	26	9	25	10	9	26			35	61
58	Khulna	General Hospital Khulna	Khulna	2020	August	145	158	154	149	104	199		303	0	0
59	Khulna	Sadar Hospital Bagerhat	Bagerhat	2020	August	31	119	67	83	41	109	0	137	13	13	0
60	Khulna	Sadar Hospital Cuadanga	Chuadanga	2020	August	136	104	107	133	82	158	0	299	41	16	1
61	Khulna	250 Bed General Hospital Jessore	Jessore	2020	August	252	332	301	283	197	387	0	557	27	0	0
62	Khulna	Sadar Hospital Jhenaidah	Jhenaidah	2020	August	57	62	35	84	28	91	0	119	0	0	0
63	Khulna	250 Bed General Hospital Kustia	Kushtia	2020	August	95	108	110	93	100	103	23	110	70	0	0
64	Khulna	250 Bed General Hospital Magura	Magura	2020	August	97	82	93	86	75	104	5	124	50	10
65	Khulna	250 Bed General Hospital Meherpur	Meherpur	2020	August	90	59	39	110	120	29	0	120	29
66	Khulna	Sadar Hospital Narail	Narail	2020	August	44	27	37	34	23	48	49	37	2	0	0
67	Khulna	Sadar Hospital Satkhira	Satkhira	2020	August	112	109	126	95	96	125		200	21	21
68	Khulna	moniram	Jessore	2020	August	0	0	0	0	0	0	0	0	0	0	0
1	Dhaka	Infectious Disease Hospital (IDH)	Dhaka	2020	September	3659	1458	2978	2139	1235	3882		3513	1604		2
2	Dhaka	Civil Surgeon Office, Gopalganj	Gopalganj	2020	September
3	Dhaka	Shaheed Tajuddin Ahmed Medical College Hospital Gazipur	Gazipur	2020	September
4	Dhaka	250 Bed General Hospital Kishoreganj	Kishoreganj	2020	September	304	178	255	227	159	323	0	434	48	78	0
5	Dhaka	Sadar Hospital Madaripur	Madaripur	2020	September	179	139	142	176	115	203	0	189	129	0	0
6	Dhaka	250 Bed General Hospital Manikganj	Manikganj	2020	September	793	564	738	619	604	753	4	205	1148	67	0
7	Dhaka	250 Bed General Hospital Tangail	Tangail	2020	September	526	1328	857	997	612	1242		1679	175	84
8	Dhaka	Shaheed Ahsan Ullah Master General Hospital Tongi	Gazipur	2020	September	253	170	267	156	199	224		398	25
9	Dhaka	Kurmitola General Hospital Kurmitola Dhaka	Dhaka	2020	September
10	Dhaka	Sadar Hospital Shariatpur	Shariatpur	2020	September	108	68	98	74	59	113	0	155	20	5	0
11	Dhaka	Sadar Hospital Narsingdi	Narshingdi	2020	September	196	94	104	186	192	98	0	175	175	0	0
12	Dhaka	Civil Surgeon Office Faridpur	Faridpur	2020	September	89	47	82	54	57	79	0	85	51	77	0
13	Dhaka	General Hospital Munshiganj	Munshiganj	2020	September	130	95	115	110	125	100	0	193	32	32
14	Dhaka	General Hospital Narayanganj	Narayanganj	2020	September
15	Dhaka	Sadar Hospital Rajbari	Rajbari	2020	September
16	Mymensing	Mymesing Medical College hospital Mymensing	Mymensingh	2020	September	404	356	425	335	128	632	0	648	112	0	0
17	Mymensing	Adhunik Sadar Hospital Netrokona	Netrakona	2020	September	161	139	181	119	120	180	0	280	20	2	0
18	Mymensing	Zila Hospital Sherpur	Sherpur	2020	September	80	231	190	121	130	181	50	241	20	1	0
19	Mymensing	250 Bed General Hospital Jamalpur	Jamalpur	2020	September	149	266	250	165	250	165		390	25	25	0
20	Chittagong	250 Bed Zila Sadar Hospital Brahmanbaria	Brahamanbaria	2020	September
21	Chittagong	250 Bed General Hospital Chandpur	Chandpur	2020	September
22	Chittagong	BITID Chittagong	Chittagong	2020	September	131	45	129	47	76	100		110	66		1
23	Chittagong	General Hospital Comilla	Comilla	2020	September
24	Chittagong	250 Bed General Hospital Cox’s Bazar	Cox'S Bazar	2020	September	182	104	182	106	133	153	287	28	23	13
25	Chittagong	250 Bed General Hospital Feni	Feni	2020	September
26	Chittagong	Adhunik General Hospital Khagrachari Hilly Zila Khagrachari	Khagrachhari	2020	September
27	Chittagong	Sadar Hospital Lakshmipur	Lakshmipur	2020	September
28	Chittagong	250 Bed General Hospital Noakhali	Noakhali	2020	September
29	Chittagong	General Hospital Rangamati	Rangamati	2020	September	55	25	59	21	17	63	12	68	0	0	0
30	Chittagong	250 Bed General Hospital Chittagong	Chittagong	2020	September
31	Chittagong	Civil Surgeon Office Bandarban Hilly Zila Bandarban	Bandarban	2020	September
32	Sylhet	Sylhet Shaheed Shamsuddin Ahmed Hospital Sylhet	Sylhet	2020	September	51	55	80	26	51	55	0	106	0	0
33	Sylhet	Adhunik Zila Sadar Hospital Habiganj	Habiganj	2020	September	120	168	158	130	157	131	0	260	28	0	0
34	Sylhet	250 Bed Zila Sadar Hospital Sunamganj	Sunamganj	2020	September	46	98	82	62	68	76	4	114	26	0	0
35	Sylhet	250 Bed Zila Sadar Hospital Moulvibazar	Maulvibazar	2020	September	75	52	20	107	50	77	25	75	27	127	0
36	Barisal	100 Bed Zila Sadar Hospital Barguna	Barguna	2020	September	146	100	106	140	145	100	90	150	5	0
37	Barisal	General Hospital Barisal	Barisal	2020	September	124	323	232	215	154	293		446	1	1
38	Barisal	Sdar Hospital Jhalokahti	Jhalokati	2020	September	36	237	103	170	81	192		247	26	6
39	Barisal	250 Bed Hospital patuakhali	Patuakhali	2020	September	25	91	50	66	66	50		115	1	2	0
40	Barisal	Sadar Hospital Pirojpur	Pirojpur	2020	September	38	190	97	131	74	154	0	226	2	4
41	Barisal	Sadar Hospital Bhola	Bhola	2020	September	86	219	119	186	119	186	0	302	3	0	0
42	Rangpur	250 Bed Zila Sadar Hospital Dinajpur	Dinajpur	2020	September
43	Rangpur	Zila Sdar Hopital Gaibandha	Gaibandha	2020	September	200	175	100	200	275	100	5	350	20		0
44	Rangpur	General Hospital Kurigram	Kurigram	2020	September	70	90	65	95	75	85		125	35	30
45	Rangpur	100 Bed Sadar Hospital Lalmonirhat	Lalmonirhat	2020	September	146	105	105	146	83	168		184	67
46	Rangpur	Adunik Sadar Hospital Nilphamari	Nilphamari	2020	September	160	398	289	269	156	402	9	545	13
47	Rangpur	Civil Surgeon Office Rangpur	Rangpur	2020	September
48	Rangpur	Sadar Hospital Panchagarh	Panchagarh	2020	September	53	130	83	100	80	103	0	172	11	0	0
49	Rangpur	Adhunik Sadar Hospital Thakurgaon	Thakurgaon	2020	September	101	139	150	90	67	173	0	218	22	15	0
50	Rajshahi	Rajshahi Medcial College Hospital	Rajshahi	2020	September	189	86			88	187	88	89	98	100
51	Rajshahi	Sadar Hospital Chapinawabganj	Nawabganj	2020	September
52	Rajshahi	250 Bed General Hospital Pabna	Pabna	2020	September	55	72	60	67	53	74	0	89	38	16
53	Rajshahi	250 Bed Mohammad Ali Zila Hospital Bogra	Bogra	2020	September
54	Rajshahi	Adhunik Zila Hospital Joypurhat	Joypurhat	2020	September	1050	350	900	500	800	600	500	610	290	40	0
55	Rajshahi	100 Bed Zila Sadar Hospital Naogaon	Naogaon	2020	September	96	69	83	82	50	115	0	160	5	5	0
56	Rajshahi	Adhunik Sadar Hospital Natore	Natore	2020	September	163	118	163	118	118	118	0	160	2	4	0
57	Rajshahi	General Hospital Sirajganj	Sirajganj	2020	September	27	11	26	12	10	28			38	63
58	Khulna	General Hospital Khulna	Khulna	2020	September	168	286	240	214	156	298		454
59	Khulna	Sadar Hospital Bagerhat	Bagerhat	2020	September	34	148	86	96	66	116	0	132	50	50	0
60	Khulna	Sadar Hospital Cuadanga	Chuadanga	2020	September	167	96	142	121	145	122	1	153	78	12	0
61	Khulna	250 Bed General Hospital Jessore	Jessore	2020	September	204	306	299	211	200	310	0	484	21	0	0
62	Khulna	Sadar Hospital Jhenaidah	Jhenaidah	2020	September	61	100	71	90	55	106	0	161	0	0	0
63	Khulna	250 Bed General Hospital Kustia	Kushtia	2020	September	130	141	150	121	155	116	50	145	76	0	0
64	Khulna	250 Bed General Hospital Magura	Magura	2020	September	89	99	106	82	91	97	9	140	39	5
65	Khulna	250 Bed General Hospital Meherpur	Meherpur	2020	September	90	85	50	125	140	35	0	140	35
66	Khulna	Sadar Hospital Narail	Narail	2020	September	39	42	48	33	30	41	28	52	1	0	0
67	Khulna	Sadar Hospital Satkhira	Satkhira	2020	September	175	132	185	122	118	189		168	39	39
68	Khulna	moniram	Jessore	2020	September	0	0	0	0	0	0	0	0	0	0	0
1	Dhaka	Infectious Disease Hospital (IDH)	Dhaka	2020	October	4942	1544	4215	2271	1465	5021		4348	2138		1
2	Dhaka	Civil Surgeon Office, Gopalganj	Gopalganj	2020	October
3	Dhaka	Shaheed Tajuddin Ahmed Medical College Hospital Gazipur	Gazipur	2020	October
4	Dhaka	250 Bed General Hospital Kishoreganj	Kishoreganj	2020	October	444	206	341	309	215	435	0	585	65	100	0
5	Dhaka	Sadar Hospital Madaripur	Madaripur	2020	October	218	196	203	211	165	249	0	234	180	0	0
6	Dhaka	250 Bed General Hospital Manikganj	Manikganj	2020	October	1238	926	1182	982	989	1175	5	208	1951	72	0
7	Dhaka	250 Bed General Hospital Tangail	Tangail	2020	October	704	1435	1001	1138	686	1453		1892	247	124
8	Dhaka	Shaheed Ahsan Ullah Master General Hospital Tongi	Gazipur	2020	October	350	170	315	205	188	332		475	45
9	Dhaka	Kurmitola General Hospital Kurmitola Dhaka	Dhaka	2020	October
10	Dhaka	Sadar Hospital Shariatpur	Shariatpur	2020	October	121	61	90	92	65	117	1	168	13	0	0
11	Dhaka	Sadar Hospital Narsingdi	Narshingdi	2020	October	328	122	188	262	156	294	0	279	171	0	0
12	Dhaka	Civil Surgeon Office Faridpur	Faridpur	2020	October
13	Dhaka	General Hospital Munshiganj	Munshiganj	2020	October	150	103	140	113	135	118	0	226	27	27
14	Dhaka	General Hospital Narayanganj	Narayanganj	2020	October
15	Dhaka	Sadar Hospital Rajbari	Rajbari	2020	October
16	Mymensing	Mymesing Medical College hospital Mymensing	Mymensingh	2020	October	557	320	487	390	234	653	0	679	198	0	0
17	Mymensing	Adhunik Sadar Hospital Netrokona	Netrakona	2020	October	163	132	160	135	118	177	0	273	22	1	0
18	Mymensing	Zila Hospital Sherpur	Sherpur	2020	October
19	Mymensing	250 Bed General Hospital Jamalpur	Jamalpur	2020	October
20	Chittagong	250 Bed Zila Sadar Hospital Brahmanbaria	Brahamanbaria	2020	October
21	Chittagong	250 Bed General Hospital Chandpur	Chandpur	2020	October
22	Chittagong	BITID Chittagong	Chittagong	2020	October
23	Chittagong	General Hospital Comilla	Comilla	2020	October
24	Chittagong	250 Bed General Hospital Cox’s Bazar	Cox'S Bazar	2020	October
25	Chittagong	250 Bed General Hospital Feni	Feni	2020	October
26	Chittagong	Adhunik General Hospital Khagrachari Hilly Zila Khagrachari	Khagrachhari	2020	October
27	Chittagong	Sadar Hospital Lakshmipur	Lakshmipur	2020	October
28	Chittagong	250 Bed General Hospital Noakhali	Noakhali	2020	October
29	Chittagong	General Hospital Rangamati	Rangamati	2020	October
30	Chittagong	250 Bed General Hospital Chittagong	Chittagong	2020	October
31	Chittagong	Civil Surgeon Office Bandarban Hilly Zila Bandarban	Bandarban	2020	October
32	Sylhet	Sylhet Shaheed Shamsuddin Ahmed Hospital Sylhet	Sylhet	2020	October	98	82	123	57	83	97	0	180	0	0
33	Sylhet	Adhunik Zila Sadar Hospital Habiganj	Habiganj	2020	October
34	Sylhet	250 Bed Zila Sadar Hospital Sunamganj	Sunamganj	2020	October	93	61	104	50	59	96	4	120	30	0	0
35	Sylhet	250 Bed Zila Sadar Hospital Moulvibazar	Maulvibazar	2020	October	101	42	39	104	70	73	20	80	43	143	0
36	Barisal	100 Bed Zila Sadar Hospital Barguna	Barguna	2020	October	102	120	90	132	100	122	100	120	2	0
37	Barisal	General Hospital Barisal	Barisal	2020	October	223	449	353	319	207	465		664	8	8
38	Barisal	Sdar Hospital Jhalokahti	Jhalokati	2020	October	56	238	127	165	119	174		288	6	2
39	Barisal	250 Bed Hospital patuakhali	Patuakhali	2020	October	63	128	91	100	100	91		185	6	12	0
40	Barisal	Sadar Hospital Pirojpur	Pirojpur	2020	October	56	226	106	176	83	199	0	281	1	3
41	Barisal	Sadar Hospital Bhola	Bhola	2020	October	99	843	154	788	320	622	2	937	3	0	0
42	Rangpur	250 Bed Zila Sadar Hospital Dinajpur	Dinajpur	2020	October
43	Rangpur	Zila Sdar Hopital Gaibandha	Gaibandha	2020	October	300	130	120	300	310	120	10	390	30		0
44	Rangpur	General Hospital Kurigram	Kurigram	2020	October	94	152	151	95	112	134		209	37	30
45	Rangpur	100 Bed Sadar Hospital Lalmonirhat	Lalmonirhat	2020	October
46	Rangpur	Adunik Sadar Hospital Nilphamari	Nilphamari	2020	October	267	402	348	321	195	474	2	654	15
47	Rangpur	Civil Surgeon Office Rangpur	Rangpur	2020	October
48	Rangpur	Sadar Hospital Panchagarh	Panchagarh	2020	October	76	200	152	124	125	151	0	258	18	0	0
49	Rangpur	Adhunik Sadar Hospital Thakurgaon	Thakurgaon	2020	October	147	169	198	118	104	212	0	252	64	64	0
50	Rajshahi	Rajshahi Medcial College Hospital	Rajshahi	2020	October	236	44			87	193	47	40	195	197
51	Rajshahi	Sadar Hospital Chapinawabganj	Nawabganj	2020	October
52	Rajshahi	250 Bed General Hospital Pabna	Pabna	2020	October
53	Rajshahi	250 Bed Mohammad Ali Zila Hospital Bogra	Bogra	2020	October
54	Rajshahi	Adhunik Zila Hospital Joypurhat	Joypurhat	2020	October	1088	300	1000	388	900	488	500	488	400	103	0
55	Rajshahi	100 Bed Zila Sadar Hospital Naogaon	Naogaon	2020	October	121	77	110	88	90	108	0	188	10	10	0
56	Rajshahi	Adhunik Sadar Hospital Natore	Natore	2020	October
57	Rajshahi	General Hospital Sirajganj	Sirajganj	2020	October	40	12	34	18	17	35			52	132
58	Khulna	General Hospital Khulna	Khulna	2020	October
59	Khulna	Sadar Hospital Bagerhat	Bagerhat	2020	October	57	173	103	127	62	168	0	169	61	61	0
60	Khulna	Sadar Hospital Cuadanga	Chuadanga	2020	October	208	114	145	177	114	208	0	249	33	11	0
61	Khulna	250 Bed General Hospital Jessore	Jessore	2020	October	418	462	482	324	463	343	0	777	29	0	0
62	Khulna	Sadar Hospital Jhenaidah	Jhenaidah	2020	October
63	Khulna	250 Bed General Hospital Kustia	Kushtia	2020	October	125	168	158	135	150	143	108	140	45	0	0
64	Khulna	250 Bed General Hospital Magura	Magura	2020	October
65	Khulna	250 Bed General Hospital Meherpur	Meherpur	2020	October
66	Khulna	Sadar Hospital Narail	Narail	2020	October	46	42	50	38	23	65	20	49	2	0	0
67	Khulna	Sadar Hospital Satkhira	Satkhira	2020	October	203	123	175	151	129	197		291	35	35
68	Khulna	moniram	Jessore	2020	October	0	0	0	0	0	0	0	0	0	0	0
1	Dhaka	Infectious Disease Hospital (IDH)	Dhaka	2020	November
2	Dhaka	Civil Surgeon Office, Gopalganj	Gopalganj	2020	November
3	Dhaka	Shaheed Tajuddin Ahmed Medical College Hospital Gazipur	Gazipur	2020	November
4	Dhaka	250 Bed General Hospital Kishoreganj	Kishoreganj	2020	November
5	Dhaka	Sadar Hospital Madaripur	Madaripur	2020	November
6	Dhaka	250 Bed General Hospital Manikganj	Manikganj	2020	November
7	Dhaka	250 Bed General Hospital Tangail	Tangail	2020	November
8	Dhaka	Shaheed Ahsan Ullah Master General Hospital Tongi	Gazipur	2020	November
9	Dhaka	Kurmitola General Hospital Kurmitola Dhaka	Dhaka	2020	November
10	Dhaka	Sadar Hospital Shariatpur	Shariatpur	2020	November
11	Dhaka	Sadar Hospital Narsingdi	Narshingdi	2020	November
12	Dhaka	Civil Surgeon Office Faridpur	Faridpur	2020	November
13	Dhaka	General Hospital Munshiganj	Munshiganj	2020	November
14	Dhaka	General Hospital Narayanganj	Narayanganj	2020	November
15	Dhaka	Sadar Hospital Rajbari	Rajbari	2020	November
16	Mymensing	Mymesing Medical College hospital Mymensing	Mymensingh	2020	November
17	Mymensing	Adhunik Sadar Hospital Netrokona	Netrakona	2020	November
18	Mymensing	Zila Hospital Sherpur	Sherpur	2020	November
19	Mymensing	250 Bed General Hospital Jamalpur	Jamalpur	2020	November
20	Chittagong	250 Bed Zila Sadar Hospital Brahmanbaria	Brahamanbaria	2020	November
21	Chittagong	250 Bed General Hospital Chandpur	Chandpur	2020	November
22	Chittagong	BITID Chittagong	Chittagong	2020	November
23	Chittagong	General Hospital Comilla	Comilla	2020	November
24	Chittagong	250 Bed General Hospital Cox’s Bazar	Cox'S Bazar	2020	November
25	Chittagong	250 Bed General Hospital Feni	Feni	2020	November
26	Chittagong	Adhunik General Hospital Khagrachari Hilly Zila Khagrachari	Khagrachhari	2020	November
27	Chittagong	Sadar Hospital Lakshmipur	Lakshmipur	2020	November
28	Chittagong	250 Bed General Hospital Noakhali	Noakhali	2020	November
29	Chittagong	General Hospital Rangamati	Rangamati	2020	November
30	Chittagong	250 Bed General Hospital Chittagong	Chittagong	2020	November
31	Chittagong	Civil Surgeon Office Bandarban Hilly Zila Bandarban	Bandarban	2020	November
32	Sylhet	Sylhet Shaheed Shamsuddin Ahmed Hospital Sylhet	Sylhet	2020	November
33	Sylhet	Adhunik Zila Sadar Hospital Habiganj	Habiganj	2020	November
34	Sylhet	250 Bed Zila Sadar Hospital Sunamganj	Sunamganj	2020	November
35	Sylhet	250 Bed Zila Sadar Hospital Moulvibazar	Maulvibazar	2020	November
36	Barisal	100 Bed Zila Sadar Hospital Barguna	Barguna	2020	November
37	Barisal	General Hospital Barisal	Barisal	2020	November
38	Barisal	Sdar Hospital Jhalokahti	Jhalokati	2020	November
39	Barisal	250 Bed Hospital patuakhali	Patuakhali	2020	November
40	Barisal	Sadar Hospital Pirojpur	Pirojpur	2020	November
41	Barisal	Sadar Hospital Bhola	Bhola	2020	November
42	Rangpur	250 Bed Zila Sadar Hospital Dinajpur	Dinajpur	2020	November
43	Rangpur	Zila Sdar Hopital Gaibandha	Gaibandha	2020	November
44	Rangpur	General Hospital Kurigram	Kurigram	2020	November
45	Rangpur	100 Bed Sadar Hospital Lalmonirhat	Lalmonirhat	2020	November
46	Rangpur	Adunik Sadar Hospital Nilphamari	Nilphamari	2020	November
47	Rangpur	Civil Surgeon Office Rangpur	Rangpur	2020	November
48	Rangpur	Sadar Hospital Panchagarh	Panchagarh	2020	November
49	Rangpur	Adhunik Sadar Hospital Thakurgaon	Thakurgaon	2020	November
50	Rajshahi	Rajshahi Medcial College Hospital	Rajshahi	2020	November
51	Rajshahi	Sadar Hospital Chapinawabganj	Nawabganj	2020	November
52	Rajshahi	250 Bed General Hospital Pabna	Pabna	2020	November
53	Rajshahi	250 Bed Mohammad Ali Zila Hospital Bogra	Bogra	2020	November
54	Rajshahi	Adhunik Zila Hospital Joypurhat	Joypurhat	2020	November
55	Rajshahi	100 Bed Zila Sadar Hospital Naogaon	Naogaon	2020	November
56	Rajshahi	Adhunik Sadar Hospital Natore	Natore	2020	November
57	Rajshahi	General Hospital Sirajganj	Sirajganj	2020	November
58	Khulna	General Hospital Khulna	Khulna	2020	November
59	Khulna	Sadar Hospital Bagerhat	Bagerhat	2020	November
60	Khulna	Sadar Hospital Cuadanga	Chuadanga	2020	November
61	Khulna	250 Bed General Hospital Jessore	Jessore	2020	November
62	Khulna	Sadar Hospital Jhenaidah	Jhenaidah	2020	November
63	Khulna	250 Bed General Hospital Kustia	Kushtia	2020	November
64	Khulna	250 Bed General Hospital Magura	Magura	2020	November
65	Khulna	250 Bed General Hospital Meherpur	Meherpur	2020	November
66	Khulna	Sadar Hospital Narail	Narail	2020	November
67	Khulna	Sadar Hospital Satkhira	Satkhira	2020	November
68	Khulna	moniram	Jessore	2020	November
1	Dhaka	Infectious Disease Hospital (IDH)	Dhaka	2020	December
2	Dhaka	Civil Surgeon Office, Gopalganj	Gopalganj	2020	December
3	Dhaka	Shaheed Tajuddin Ahmed Medical College Hospital Gazipur	Gazipur	2020	December
4	Dhaka	250 Bed General Hospital Kishoreganj	Kishoreganj	2020	December
5	Dhaka	Sadar Hospital Madaripur	Madaripur	2020	December
6	Dhaka	250 Bed General Hospital Manikganj	Manikganj	2020	December
7	Dhaka	250 Bed General Hospital Tangail	Tangail	2020	December
8	Dhaka	Shaheed Ahsan Ullah Master General Hospital Tongi	Gazipur	2020	December
9	Dhaka	Kurmitola General Hospital Kurmitola Dhaka	Dhaka	2020	December
10	Dhaka	Sadar Hospital Shariatpur	Shariatpur	2020	December
11	Dhaka	Sadar Hospital Narsingdi	Narshingdi	2020	December
12	Dhaka	Civil Surgeon Office Faridpur	Faridpur	2020	December
13	Dhaka	General Hospital Munshiganj	Munshiganj	2020	December
14	Dhaka	General Hospital Narayanganj	Narayanganj	2020	December
15	Dhaka	Sadar Hospital Rajbari	Rajbari	2020	December
16	Mymensing	Mymesing Medical College hospital Mymensing	Mymensingh	2020	December
17	Mymensing	Adhunik Sadar Hospital Netrokona	Netrakona	2020	December
18	Mymensing	Zila Hospital Sherpur	Sherpur	2020	December
19	Mymensing	250 Bed General Hospital Jamalpur	Jamalpur	2020	December
20	Chittagong	250 Bed Zila Sadar Hospital Brahmanbaria	Brahamanbaria	2020	December
21	Chittagong	250 Bed General Hospital Chandpur	Chandpur	2020	December
22	Chittagong	BITID Chittagong	Chittagong	2020	December
23	Chittagong	General Hospital Comilla	Comilla	2020	December
24	Chittagong	250 Bed General Hospital Cox’s Bazar	Cox'S Bazar	2020	December
25	Chittagong	250 Bed General Hospital Feni	Feni	2020	December
26	Chittagong	Adhunik General Hospital Khagrachari Hilly Zila Khagrachari	Khagrachhari	2020	December
27	Chittagong	Sadar Hospital Lakshmipur	Lakshmipur	2020	December
28	Chittagong	250 Bed General Hospital Noakhali	Noakhali	2020	December
29	Chittagong	General Hospital Rangamati	Rangamati	2020	December
30	Chittagong	250 Bed General Hospital Chittagong	Chittagong	2020	December
31	Chittagong	Civil Surgeon Office Bandarban Hilly Zila Bandarban	Bandarban	2020	December
32	Sylhet	Sylhet Shaheed Shamsuddin Ahmed Hospital Sylhet	Sylhet	2020	December
33	Sylhet	Adhunik Zila Sadar Hospital Habiganj	Habiganj	2020	December
34	Sylhet	250 Bed Zila Sadar Hospital Sunamganj	Sunamganj	2020	December
35	Sylhet	250 Bed Zila Sadar Hospital Moulvibazar	Maulvibazar	2020	December
36	Barisal	100 Bed Zila Sadar Hospital Barguna	Barguna	2020	December
37	Barisal	General Hospital Barisal	Barisal	2020	December
38	Barisal	Sdar Hospital Jhalokahti	Jhalokati	2020	December
39	Barisal	250 Bed Hospital patuakhali	Patuakhali	2020	December
40	Barisal	Sadar Hospital Pirojpur	Pirojpur	2020	December
41	Barisal	Sadar Hospital Bhola	Bhola	2020	December
42	Rangpur	250 Bed Zila Sadar Hospital Dinajpur	Dinajpur	2020	December
43	Rangpur	Zila Sdar Hopital Gaibandha	Gaibandha	2020	December
44	Rangpur	General Hospital Kurigram	Kurigram	2020	December
45	Rangpur	100 Bed Sadar Hospital Lalmonirhat	Lalmonirhat	2020	December
46	Rangpur	Adunik Sadar Hospital Nilphamari	Nilphamari	2020	December
47	Rangpur	Civil Surgeon Office Rangpur	Rangpur	2020	December
48	Rangpur	Sadar Hospital Panchagarh	Panchagarh	2020	December
49	Rangpur	Adhunik Sadar Hospital Thakurgaon	Thakurgaon	2020	December
50	Rajshahi	Rajshahi Medcial College Hospital	Rajshahi	2020	December
51	Rajshahi	Sadar Hospital Chapinawabganj	Nawabganj	2020	December
52	Rajshahi	250 Bed General Hospital Pabna	Pabna	2020	December
53	Rajshahi	250 Bed Mohammad Ali Zila Hospital Bogra	Bogra	2020	December
54	Rajshahi	Adhunik Zila Hospital Joypurhat	Joypurhat	2020	December
55	Rajshahi	100 Bed Zila Sadar Hospital Naogaon	Naogaon	2020	December
56	Rajshahi	Adhunik Sadar Hospital Natore	Natore	2020	December
57	Rajshahi	General Hospital Sirajganj	Sirajganj	2020	December
58	Khulna	General Hospital Khulna	Khulna	2020	December
59	Khulna	Sadar Hospital Bagerhat	Bagerhat	2020	December
60	Khulna	Sadar Hospital Cuadanga	Chuadanga	2020	December
61	Khulna	250 Bed General Hospital Jessore	Jessore	2020	December
62	Khulna	Sadar Hospital Jhenaidah	Jhenaidah	2020	December
63	Khulna	250 Bed General Hospital Kustia	Kushtia	2020	December
64	Khulna	250 Bed General Hospital Magura	Magura	2020	December
65	Khulna	250 Bed General Hospital Meherpur	Meherpur	2020	December
66	Khulna	Sadar Hospital Narail	Narail	2020	December
67	Khulna	Sadar Hospital Satkhira	Satkhira	2020	December
68	Khulna	moniram	Jessore	2020	December
