# Supplementary material for: Progress towards one health approach for dog-mediated human rabies elimination in Bangladesh: on the way to zero by 30
Source: Research Square preprint supplement (doi:10.21203/rs.3.rs-3201454/v1), 2023-07-28
Supplement: Supplementary file 3 [file 8b278ef8c0aeeb3ba42f5635.xlsx]

## Sheet: Upazila based
	MDV coverage in Bangladesh
	Year	Districts	Wards/ Union	Humen Popula:	Est: dogs	% Humen to Dog	Dogs Vacc:	N: Vacci: Dogs	Coverage(%)
	Chittagong Division
	2011	Coxs Bazar Sadar Munici:	9	167477	4500	2.68694	3285	1215	73
	Dhaka Division
	2012	Dhamrai Municipality	9	56777	302	0.531906	214	88	70.8609
	Rangpur division
	2012	Rangpur Sadar Municipality	15	320000	2203	0.688438	1907	296	86.5638
	2012	Gaibandha Sadar Munici:	9	59289	705	1.18909	538	167	76.3121
	2012	Kurigram Sadar Munici:	9	121916	1105	0.906362	845	260	76.4706
	2012	Lalmonirhat Sadar Munici:	9	62467	886	1.41835	733	153	82.7314
	2012	Nilphamari Sadar Munici:	9	47493	1668	3.5121	1353	315	81.1151
	2012	Dinajpur Sadar Munici:	12	163040	2036	1.24877	1601	435	78.6346
	2012	Panchagarh Sadar Munici:	9	44736	2036	4.55114	815	1221	40.0295
	2012	Thakurgaon Sadar Munici:	12	134548	1150	0.854714	950	200	82.6087
	Rajshahi division
	2012	Naogaon Sadar Municipality	9	150549	1627	1.08071	1485	142	91.2723
	2012	Chapai Nawabganj Sadar Muni:	15	267542	1298	0.485157	1054	244	81.2018
	2012	Bogra Sadar Municipality	21	362563	3012	0.830752	2591	421	86.0226
	2012	Joypurhat Sadar Munici:	9	106733	821	0.769209	621	200	75.6395
	2012	Natore Sadar Municipality	9	81193	1257	1.54816	954	303	75.895
	2012	Sirajganj Sadar Municipality	15	297230	1662	0.559163	1446	216	87.0036
	2012	Pabna Sadar Municipality	15	181939	1125	0.618339	1084	41	96.3556
	2012	Rajshahi Sadar Municipality	12	842701	5172	0.613741	4397	775	85.0155
	Sylhet division
	2012	Hobiganj Sadar Municipality	9	95000	575	0.605263	524	51	91.1304
	2012	Moulvibazar Sadar Munici:	9	56534	454	0.803057	429	25	94.4934
	2012	Sunamganj Sadar Munici:	9	87654	629	0.717594	560	69	89.0302
	Dhaka Division
	2012	Narayanganj City Corporation	27	1200000	4243	0.353583	3323	920	78.3172
	2012	Gazipur Sadar Municipality	9	122801	1826	1.48696	1570	256	85.9803
	2012	Narshingdi Sadar Munici:	9	146000	1320	0.90411	1250	70	94.697
	2012	Shariatpur Sadar Munici:	9	56356	1055	1.87203	976	79	92.5118
	2012	Rajbari Sadar Municipality	9	55782	346	0.620272	313	33	90.4624
	2012	Madaripur Sadar Munici:	9	150000	770	0.513333	625	145	81.1688
	2012	Gopalganj Sadar Munici:	9	114950	611	0.531535	527	84	86.252
	2012	Foridpur Sadar Munici:	9	146921	1253	0.852839	1059	194	84.5172
	2012	Tangil Municipality	21	186726	1183	0.633549	956	227	80.8115
	2012	Kishoreganj Sadar Munici:	9	103798	1490	1.43548	1341	149	90
	2012	Mymensingh Sadar Munici:	21	407798	1761	0.431831	1510	251	85.7467
	2012	Netrokona Sadar Munici:	9	102000	1350	1.32353	1173	177	86.8889
	2012	Sherpur Sadar Municipality	9	104000	755	0.725962	635	120	84.106
	2012	Jamalpur Sadar Municipality	9	142764	1125	0.788014	1024	101	91.0222
	2012	Tongi Municipality	21	350000	3642	1.04057	3036	606	83.3608
	2012	Manikgonj Sadar Municipality	9	52526	1249	2.37787	1097	152	87.8303
	2012	Munsiganj Sadar Municipality	9	82600	1278	1.54722	1139	139	89.1236
	Khulna Division
	2013	Kushtia Sadar Municipality	9	375149	1051	0.280155	913	138	86.8696
	2013	Jessore Sadar Municipality	9	286163	1516	0.529768	1335	181	88.0607
	2013	Chuyadanga Sadar Muni:	9	174000	945	0.543103	794	151	84.0212
	2013	Narial Sadar Municipality	9	64312	564	0.876975	725	-161	128.546
	2013	Jhanidaha Sadar Municipality	9	157822	1068	0.676712	927	141	86.7978
	2013	Magura Sadar Municipality	9	114054	1055	0.925	975	80	92.4171
	2013	Bagerhat Sadar Municipality	9	125174	1117	0.892358	1023	94	91.5846
	2013	Satkhera Sadar Municipality	9	98560	1332	1.35146	1108	224	83.1832
	2013	Maharpur Sadar Municipality	9	69630	1158	1.66308	1026	132	88.601
	Chittagong Division
	2013	Noyakhali Sadar Municipality	9	75956	1057	1.3916	916	141	86.6604
	2013	B.Bariya Sadar Municipality	9	132462	879	0.663587	805	74	91.5813
	2013	Khagrachari Sadar Muni:	9	71250	1272	1.78526	1174	98	92.2956
	2013	Laksumpur Sadar Munici:	9	63995	758	1.18447	565	193	74.5383
	2013	Fani Sadar Municipality	9	73182	1379	1.88434	1154	225	83.6838
	2013	Bandarbon Sadar Muni:	9	73800	642	0.869919	515	127	80.2181
	2013	Chandpur Sadar Munici:	9	95390	1273	1.33452	1105	168	86.8028
	2013	Rangamati Sadar Munici:	9	69832	1195	1.71125	1029	166	86.1088
	2014	Chittagong City Corporation	41	2078625	7340	0.353118	5688	1652	77.4932
	2014	Comilla City Corporation	27	500000	2446	0.4892	2158	288	88.2257
	2014	Sylhet City Corporation	27	270606	2320	0.857335	2175	145	93.75
	2014	Satkhira Sadar Municipality	9	98560	1458	1.4793	1374	84	94.2387
	2014	Cox’s Bazar Sadar Munici:	12	167477	5100	3.04519	4030	1070	79.0196
	2014	Khulna City Corporation	31	1500000	4329	0.2886	3847	482	88.8658
	Barisal Division
	2014	Jhalokati Sadar Municipality	9	47534	602	1.26646	484	118	80.3987
	2014	Barisal City Corporation	30	328278	3947	1.20233	3463	484	87.7375
	2014	Pirojpur District Municipality	9	78057	1196	1.53221	911	285	76.1706
	2014	Barguna Sadar Municipality	9	60875	524	0.86078	472	52	90.0763
	2014	Patuakhali Sadar Muninci:	9	100000	718	0.718	588	130	81.8942
	2014	Bhola Sadar Municipality	9	83112	980	1.17913	826	154	84.2857
	2014	Kulaura tea garden	1	1500	374	24.9333	302	72	80.7487
	Gaibandha Districts
	2015	Gaibandha Municipality	9	59289	621	1.04741	498	123	80.1932
	2015	Gaibandha Sadar Upazila	13	437268	4436	1.01448	3119	1317	70.3111
	2015	Gobidhoganj Upazila	17	461428	5534	1.19932	4173	1361	75.4066
	2015	Sundarganj Upazila	15	461920	5022	1.0872	3620	1402	72.0828
	2015	Palasbari Upazila	9	231755	3733	1.61075	2821	912	75.5692
	2015	Sadullahpur Upazila	11	246035	4402	1.78918	3162	1240	71.831
	2015	Saghata Upazila	10	271045	4442	1.63884	3508	934	78.9734
	2015	Fulchari Upazila	7	137795	1995	1.4478	1583	412	79.3484
	Sirajganj Districts
	2015	Sirajganj Sadar Munici:	15	297230	1724	0.580022	1326	398	76.9142
	2015	Sadar Upazila	10	589000	4693	0.796774	3699	994	78.8195
	2015	Ullahpara Upazila	14	540156	4814	0.891224	3418	1396	71.0012
	2015	Sahazadpur Upazila	13	556350	4643	0.834547	3097	1546	66.7026
	2015	Kazipur Upazila	12	285309	3392	1.18889	2562	830	75.5307
	2015	Raiganj Upazila	9	285445	4395	1.5397	3381	1014	76.9283
	2015	Tarash Upazila	8	195964	4306	2.19734	3162	1144	73.4324
	2015	Kamarkhand Upazila	4	133332	1511	1.13326	1114	397	73.726
	2015	Belkuchi Upazila	7	352835	2571	0.728669	1904	667	74.0568
	2015	Chawhali Upazila	7	147143	1516	1.03029	1201	315	79.2216
	Pabna Districts
	2015	Pabna Sadar Municipality	15	181939	822	0.4518	628	194	76.399
	2015	Sadar Upazila	10	590914	3743	0.633426	2925	818	78.1459
	2015	Sujanagar Upazila	10	251192	3214	1.2795	2469	745	76.8202
	2015	Ishwardi Upazila	7	313932	2577	0.820878	1842	735	71.4785
	2015	Bera Upazila	9	256793	3354	1.30611	2526	828	75.3131
	2015	Chatmahor Upazila	11	287790	3545	1.2318	2517	1028	71.0014
	2015	Santhia Upazila	10	323932	3870	1.1947	3000	870	77.5194
	2015	Atghoria Upazila	5	157254	1846	1.1739	1720	126	93.1744
	2015	Bhangura Upazila	6	132758	1661	1.25115	1193	468	71.8242
	2015	Faridpur Upazila	6	135491	1777	1.31153	1327	450	74.6764
	Gazipur Districts
	2015	Gazipur City Corporation	57	2000000	21717	1.08585	16724	4993	77.0088
	2015	Sadar Upazila	8	194297	3072	1.58108	2375	697	77.3112
	2015	Sreepur Upazila	8	492792	3909	0.793235	2919	990	74.6738
	2015	Kapasia Upazila	11	321454	3554	1.1056	2855	699	80.332
	2015	Kaliakoir Upazila	9	255967	4439	1.73421	3451	988	77.7427
	2015	Kaliganj Upazila	7	239660	2120	0.884586	1651	469	77.8774
	Manikganj Districts
	2015	Manikganj Sadar Munici:	9	52526	880	1.67536	760	120	86.3636
	2015	Sadar Upazila	10	261622	3409	1.30302	2465	944	72.3086
	2015	Shibaloy Upazila	7	171873	3043	1.77049	2442	601	80.2498
	2015	Shingair Upazila	11	140834	6449	4.57915	4938	1511	76.57
	2015	Saturia Upazila	9	171494	3787	2.20824	2918	869	77.0531
	2015	Doulothpur Upazila	8	427913	3452	0.806706	2575	877	74.5944
	2015	Horirampur Upazila	13	139318	3270	2.34715	2334	936	71.3761
	2015	Ghior Upazila	7	146292	2970	2.03019	2345	625	78.9562
	Madaripur Districts
	2015	Madaripur Sadar Munici:	9	150000	1196	0.797333	1097	99	91.7224
	2015	Sadar Upazila	15	345764	5550	1.60514	4991	559	89.9279
	2015	Rajoir Upazila	11	237458	4421	1.8618	3880	541	87.7629
	2015	Shibchar Upazila	19	427913	7593	1.77443	5953	1640	78.4012
	2015	Kalkini Upazila	14	273258	5231	1.91431	4285	946	81.9155
	Dhaka Division
	2016	Sonargao Municipality	9	33827	467	1.38055	403	64	86.2955
	2016	Savar Municipality	9	584041	1263	0.216252	1095	168	86.6983
	2016	Dohar Municipality	9	71362	760	1.06499	645	115	84.8684
	Chittagong Districts
	2016	Sandwip Upazila	15	278605	4275	1.53443	3805	470	89.0058
	2016	DDCC+DNCC	7	1505376	6563	0.435971	5827	736	88.7856
	2016	DSCC (55,56,57 No Ward)	3	60000	5808	9.68	4983	825	85.7955
	Kishoregang Districts
	2016	Astugram Upazila	8	145552	2890	1.98554	2450	440	84.7751
	2016	Pakundia Upazila	10	190700	3840	2.01363	3306	534	86.0938
	2016	Itna Upazila	9	148040	3650	2.46555	2870	780	78.6301
	2016	Mithamoin Upazila	7	122026	2105	1.72504	1805	300	85.7482
	2016	Bajitpur Upazila	12	197081	2779	1.41008	2347	432	84.4548
	2016	Nikli Upazila	7	130379	2384	1.82852	1870	514	78.4396
	2016	Kotiyadi Upazila	9	314529	3845	1.22246	3181	664	82.7308
	Magura Districts
	2016	Sreepur Upazila	8	173097	2526	1.4593	2120	406	83.9272
	2016	Mohammodpur Upazila	8	188760	3500	1.85421	2610	890	74.5714
	Noagong Districts
	2016	Manda Upazila	14	400786	5530	1.37979	4506	1024	81.4828
	2016	Mohadebpur Upazila	10	292859	4208	1.43687	3395	813	80.6797
	Mymensingh Districts
	2016	Fulbaria Upazila	13	448467	4158	0.927159	3506	652	84.3194
	2016	Muktagacha Upazila	10	366397	3650	0.996187	2750	900	75.3425
	Goplgong Districts
	2016	Sadar Upazila	21	319934	5091	1.59127	4424	667	86.8984
	2016	Tungipara Upazila	5	99705	3750	3.7611	3150	600	84
	2016	Kotalipara Upazila	12	227025	5445	2.39841	4550	895	83.5629
	Nilphamari Districts
	2016	Sadar Upazila	15	427913	6970	1.62884	5957	1013	85.4663
	2016	Joldhaka Upazila	11	354287	4771	1.34665	3731	1040	78.2016
	Gaibandha Districts (2nd Round)
	2017-06-01	Gaibandha Munici: (3rd round)	9	59289	669	1.12837	562	107	84.006
	2017-06-01	Gaibandha Sadar Upazila	13	437268	3683	0.842275	2854	829	77.4912
	2017-06-01	Gobidhoganj Upazila	17	461428	4352	0.943159	3416	936	78.4926
	2017-06-01	Sundarganj Upazila	15	461920	4503	0.974844	3590	913	79.7246
	2017-06-01	Palasbari Upazila	9	231755	3863	1.66685	3155	708	81.6723
	2017-06-01	Sadullahpur Upazila	11	246035	4047	1.64489	3185	862	78.7003
	2017-06-01	Saghata Upazila	10	271045	3721	1.37283	3166	555	85.0847
	2017-06-01	Fulchari Upazila	7	137795	2136	1.55013	1716	420	80.3371
	Gazipur City Corporation (2nd Round)
	2017-08-01	Gazipur City Corporation	57	2000000	15733	0.78665	12818	2915	81.4721
	Nilphamari Districts
	2017-09-01	Domar Upazila	10	245250	3907	1.59307	3140	767	80.3686
	2017-09-01	Dimla Upazila	10	280076	3445	1.23002	2818	627	81.7997
	Manikganj Districts (2nd Round)
	2018-03-01	Sadar Upazila	10	261622	4629	1.76935	3520	1109	76.0423
	2018-03-01	Shibaloy Upazila	7	171873	2801	1.62969	2191	610	78.2221
	2018-03-01	Shingair Upazila	11	140834	5139	3.64898	3739	1400	72.7573
	2018-03-01	Saturia Upazila	9	171494	3207	1.87004	2482	725	77.3932
	2018-03-01	Doulothpur Upazila	8	427913	2810	0.656676	2132	678	75.8719
	2018-03-01	Horirampur Upazila	13	139318	3911	2.80725	3427	484	87.6246
	2018-03-01	Ghior Upazila	7	146292	2741	1.87365	2169	572	79.1317
	Narsingdi Districts							0
	2018-03-01	Sadar Upazila	14	765667	6175	0.806486	5404	771	87.5142
	2018-03-01	Belabo Upazila	8	190086	2417	1.27153	2048	369	84.7331
	2018-03-01	Monohardi Upazila	12	284563	3388	1.1906	2880	508	85.0059
	2018-03-01	Palash Upazila	4	212612	1558	0.73279	1274	284	81.7715
	2018-03-01	Raipura Upazila	24	454860	5638	1.2395	4855	783	86.1121
	2018-03-01	Shibpur Upazila	9	315667	3024	0.957972	2463	561	81.4484
	Narayanganj Districts
	2018-04-01	Sadar Upazila	7	1323600	3018	0.228015	2171	847	71.9351
	2018-04-01	Araihazar Upazila	10	376550	4135	1.09813	3134	1001	75.792
	2018-04-01	Bandar Upazila	5	312841	2822	0.902056	2270	552	80.4394
	2018-04-01	Rupganj Upazila	5	239660	3101	1.29392	2366	735	76.298
	2018-04-01	Sonargaon Upazila	10	345800	3055	0.883459	2235	820	73.1588
	Gazipur Districts (2nd Round)
	2018-04-01	Sadar Upazila	4	194997	2799	1.43541	2031	768	72.5616
	2018-04-01	Kapasia Upazila	9	255957	2957	1.15527	2402	555	81.231
	2018-04-01	Sreepur Upazila	11	321454	3394	1.05583	2743	651	80.8191
	2018-04-01	Kaliganj Upazila	7	239660	2593	1.08195	2233	360	86.1165
	2018-04-01	Kaliakoir Upazila	8	492792	3916	0.794656	3069	847	78.3708
	Sirajganj Districts (2nd Round)
	2018-04-01	Sadar Upazila	10	579000	6402	1.1057	4780	1622	74.6642
	2018-04-01	Ullahpara Upazila	14	540156	4908	0.908626	3858	1050	78.6064
	2018-04-01	Sahazadpur Upazila	13	556350	4438	0.797699	3532	906	79.5854
	2018-04-01	Kazipur Upazila	12	285309	3190	1.11809	2494	696	78.1818
	2018-04-01	Raiganj Upazila	9	285445	4075	1.4276	3360	715	82.454
	2018-04-01	Tarash Upazila	8	195964	2864	1.46149	2404	460	83.9385
	2018-04-01	Kamarkhand Upazila	4	133332	1698	1.27351	1391	307	81.9199
	2018-04-01	Belkuchi Upazila	7	285445	3017	1.05695	2164	853	71.7269
	2018-04-01	Chawhali Upazila	7	147143	2118	1.43942	1356	762	64.0227
	Munshiganj Districts
	2018-04-01	Sadar Upazila	9	399560	3732	0.934027	2782	950	74.5445
	2018-04-01	Serajdikhan Upazila	14	241804	3756	1.55332	2871	885	76.4377
	2018-04-01	Tongibari Upazila		197173	2853	1.44695	2441	412	85.5591
	2018-04-01	Srinagar Upazila	14	284563	4567	1.60492	3457	1110	75.6952
	2018-04-01	Louhajanj Upazila	10	212612	2770	1.30284	2200	570	79.4224
	2018-04-01	Gojari Upazila	8	157988	2676	1.6938	2239	437	83.6697
	Jamalpur Districts
	2018-04-01	Sadar Upazila	15	615072	4779	0.776982	3394	1385	71.019
	2018-04-01	Madarganj Upazila	7	263608	2214	0.839883	1748	466	78.9521
	2018-04-01	Shorshabari Upazila	8	285445	2487	0.871271	1937	550	77.885
	2018-04-01	Bokshiganj Upazila	7	218930	2946	1.34564	2326	620	78.9545
	2018-04-01	Islampur Upazila	12	289337	2623	0.906555	2210	413	84.2547
	2018-04-01	Deowanganj Upazila	8	258133	2223	0.861184	1824	339	82.0513
	2018-04-01	Melandah Upazila	11	292347	2015	0.689249	1596	419	79.206
	Sherpur Districts
	2018-04-01	Sadar Upazila	14	399560	4395	1.09996	3541	854	80.5688
	2018-04-01	Sribordi Upazila	10	259648	2621	1.00944	2058	563	78.5196
	2018-04-01	Jhinaigati Upazila	7	157988	2267	1.43492	1713	554	75.5624
	2018-04-01	Nalitabari Upazila	12	284563	4146	1.45697	3311	835	79.8601
	2018-04-01	Nakla Upazila	9	198080	2170	1.09552	1654	516	76.2212
	Mymensingh Districts
	2018-05-01	Mymensingh City Corporation	33	471858	4084	0.865515	3332	752	81.5867
	2018-05-01	Sadar Upazila	13	674452	3870	0.573799	2887	983	74.5995
	2018-05-01	Fulbaria Upazila	13	448467	4153	0.926044	3173	980	76.4026
	2018-05-01	Trishal Upazila	12	435803	3261	0.748274	2697	564	82.7047
	2018-05-01	Bhaluka Upazila	11	308778	2624	0.849801	2183	441	83.1936
	2018-05-01	Muktagacha Upazila	10	366397	3826	1.04422	2634	1192	68.8447
	2018-05-01	Dhobaura Upazila	7	427913	4395	1.02708	3447	936	78.43
	2018-05-01	Phulpur Upazila	10	315272	4468	1.41719	3655	953	81.8039
	2018-05-01	Haluaghat Upazila	12	290043	5020	1.73078	3651	1369	72.7291
	2018-05-01	Gouripur Upazila	10	300265	3987	1.32783	3376	611	84.6752
	2018-05-01	Gafargaon Upazila	15	413488	4622	1.11781	3675	947	79.511
	2018-05-01	Iswarganj Upazila	11	574452	3593	0.625466	3016	577	83.941
	2018-05-01	Nandail Upazila	12	420717	4154	0.987362	3326	828	80.0674
	2018-05-01	Tarakanda Upazila	10	412261	3705	0.898703	3107	596	83.8596
	kishoreganj Districts
	2018-05-01	Sadar Upazila	11	300317	3630	1.20872	2708	922	74.6006
	2018-05-01	Itna Upazila	9	148040	2881	1.9461	2520	361	87.4696
	2018-05-01	Katiadi Upazila	11	134529	3698	2.74885	3026	672	81.828
	2018-05-01	Bhairab Upazila	7	95950	2187	2.27931	1916	271	87.6086
	2018-05-01	Tarail Upazila	7	152190	1645	1.08089	1340	305	81.459
	2018-05-01	Hossainpur Upazila	6	165070	2422	1.46726	1998	424	82.4938
	2018-05-01	Pakundia Upazila	11	210355	2223	1.05678	1824	399	82.0513
	2018-05-01	Kuliarchar Upazila	6	165070	1560	0.945054	1256	304	80.5128
	2018-05-01	Karimgonj Upazila	11	251882	3057	1.21366	2750	307	89.9575
	2018-05-01	Bajitpur Upazila	11	500052	2563	0.512547	2156	407	84.1202
	2018-05-01	Austagram Upazila	8	308778	2113	0.68431	1820	293	86.1335
	2018-05-01	Mithamoin Upazila	6	574452	1676	0.291756	1458	218	86.9928
	2018-05-01	Nikli Upazila	7	156743	1538	0.981224	1230	308	79.974
	Netrokona Districts
	2018-06-01	Sadar Upazila	12	349540	4014	1.14837	3407	607	84.8779
	2018-06-01	Barhatta Upazila	7	180449	2747	1.52231	2228	519	81.1067
	2018-06-01	Durgapur Upazila	7	224893	2951	1.31218	2173	778	73.6361
	2018-06-01	Kendua Upazila	13	314450	3349	1.06503	2705	644	80.7704
	2018-06-01	Atpara Upazila	7	132440	2072	1.56448	1674	398	80.7915
	2018-06-01	Madan Upazila	8	142472	2367	1.66138	1844	523	77.9045
	2018-06-01	Phurbadhala Upazila	11	310838	3299	1.06132	2748	551	83.298
	2018-06-01	Kalmakandha Upazila	8	271912	3520	1.29454	2878	642	81.7614
	2018-06-01	Mohanganj Upazila	7	243535	3038	1.24746	2571	467	84.628
	2018-06-01	Khalijuari Upazila	6	94660	1609	1.69977	1359	250	84.4624
	Tangail Districts
	2018-06-01	Sadar Upazila	12	521104	3979	0.763571	2994	985	75.245
	2018-06-01	Basail Upazila	6	160346	2824	1.76119	2272	552	80.4533
	2018-06-01	Bhuapur Upazila	6	190910	1946	1.01933	1590	356	81.7061
	2018-06-01	Delduar Upazila	8	188449	2492	1.32237	1829	663	73.3949
	2018-06-01	Ghatail Upazila	11	434300	4134	0.951877	3381	753	81.7852
	2018-06-01	Gopalpur Upazila	7	274273	3224	1.17547	2672	552	82.8784
	2018-06-01	Madhupur Upazila	11	296748	3990	1.34458	3186	804	79.8496
	2018-06-01	Nagarpur Upazila	12	258431	4688	1.81402	4026	662	85.8788
	2018-06-01	Sakhipur Upazila	8	275986	3347	1.21274	2228	1119	66.5671
	2018-06-01	Dhanbari Upazila	7	203284	2885	1.4192	2412	473	83.6049
	2018-06-01	Kalihati Upazila	17	410293	5508	1.34246	4219	1289	76.5977
	2018-06-01	Mirzapur Upazila	14	423708	5373	1.26809	4600	773	85.6133
	2018-08-01	Narayanganj City Corporation	27	1397242	5947	0.425624	5485	462	92.2314
	2018-08-01	Megna Upazila	8	96970	982	1.01268	817	165	83.1976
	2018-09-18	Chittagong City Corporation	41	4009423	9507	0.237116	8470	1065	89.0922
	2018-09-18	Sreepur Upazila	8	321454	4436	1.37998	3840	596	86.5645
	Sylhet Districts
	2018-10-18	Sylhet City Corporation	27	485138	2775	0.572002	2430	345	87.5676
	2018-10-18	Sylhet sadar Upazila	8	493784	3670	0.74324	3240	430	88.2834
	2018-10-18	Dakshin Surma Upazila	10	188675	3170	1.68014	2380	790	75.0789
	2018-10-18	Zakiganj Upazila	9	266085	1735	0.652047	1369	366	78.9049
	2018-10-18	Companiganj Upazila	6	214652	1706	0.794775	1476	230	86.5182
	2018-10-18	Jaintapur Upazila	6	121458	1789	1.47294	1464	325	81.8334
	2018-10-18	Goawainghat Upazila	9	207170	2701	1.30376	2185	516	80.896
	2018-10-18	Fenchuganj Upazila	5	95161	1475	1.55	1280	195	86.7797
	2018-10-18	Biswanath Upazila	8	189775	1419	0.747728	1139	280	80.2678
	2018-10-18	Beanibazar Upazila	10	210673	1794	0.851557	1650	144	91.9732
	2018-10-18	Balaganj Upazila	14	256239	2280	0.889794	1870	410	82.0175
	2018-10-18	Golapganj Upazila	11	263953	3660	1.38661	2730	930	74.5902
	2018-10-18	Osmaninagar Upazila	8	230546	1979	0.858397	1682	297	84.9924
	2018-10-18	Kanaighat Upazila	9	427913	2195	0.512955	1813	382	82.5968
	Sunamganj Districts
	2018-10-18	Sunamganj Sadar Upazila	9	219338	3274	1.49267	2789	485	85.1863
	2018-10-18	Doara Bazar Upazila	9	188675	2179	1.1549	1875	304	86.0486
	2018-10-18	Chatok Upazila	13	266085	2998	1.12671	2780	218	92.7285
	2018-10-18	South Sunamganj Upazila	8	183825	2307	1.255	2125	182	92.111
	2018-10-18	Jamalganj Upazila	6	167354	1350	0.806673	1075	275	79.6296
	2018-10-18	Tahirpur Upazila	7	155198	2160	1.39177	1852	308	85.7407
	2018-10-18	Bishomvorpur Upazila	5	140855	1692	1.20124	1457	235	86.1111
	2018-10-18	Shalla Upazila	4	110056	1156	1.05037	980	176	84.7751
	2018-10-18	Jagonnathpur Upazila	8	259449	2600	1.00212	2121	479	81.5769
	2018-10-18	Dherai Upazila	9	243690	3031	1.24379	2520	511	83.1409
	2018-10-18	Dharmpasa Upazila	10	197935	2630	1.32872	2470	160	93.9163
	2018-10-18	DSCC (55,56,57 No Ward)	3	60000	3698	6.16333	3126	572	84.5322
	Moulvibazar Districts
	2018-11-18	Moulvibazar Sadar Upazila	12	281593	3460	1.22872	2882	578	83.2948
	2018-11-18	Rajnagar Upazila	8	232666	2601	1.11791	2194	407	84.3522
	2018-11-18	Sreemangal Upazila	9	287980	4713	1.63657	4134	579	87.7148
	2018-11-18	Kamalganj Upazila	9	259130	2998	1.15695	2780	218	92.7285
	2018-11-18	Kulaura Upazila	13	360195	2630	0.73016	2470	160	93.9163
	2018-11-18	Juri Upazila	6	148958	2073	1.39167	1780	293	85.8659
	2018-11-18	Barlekha Upazila	10	267743	2280	0.851563	2070	210	90.7895
	Habiganj Districts
	2018-11-18	Habiganj Sadar Upazila	10	275074	3342	1.21495	2857	485	85.4877
	2018-11-18	Baniachong Upazila	15	334605	3010	0.899568	2622	388	87.1096
	2018-11-18	Ajmiriganj Upazila	5	99240	1956	1.97098	1672	284	85.4806
	2018-11-18	Nabiganj Upazila	13	285040	3410	1.19632	2700	710	79.1789
	2018-11-18	Madhabpur Upazila	11	319016	2640	0.827545	2301	339	87.1591
	2018-11-18	Lakhai Upazila	6	148811	1522	1.02277	1363	159	89.5532
	2018-11-18	Chunarughat Upazila	10	267020	3385	1.2677	2870	515	84.7858
	2018-11-18	Bahubal Upazila	7	197997	1720	0.8687	1510	210	87.7907
	2018-11-18	DSCC (25,26,28,29,30 No Ward)	5	100000	1777	1.777	1572	205	88.4637
	Gaibandha Districts (3rd Round)
	2018-12-01	Gaibandha Sadar Upazila	13	437268	4497	1.02843	3579	918	79.5864
	2018-12-01	Gobidhoganj Upazila	17	461428	6411	1.38938	5062	1349	78.958
	2018-12-01	Sundarganj Upazila	15	461920	3990	0.863786	2934	1056	73.5338
	2018-12-01	Palasbari Upazila	9	231755	3216	1.38767	2612	604	81.2189
	2018-12-01	Sadullahpur Upazila	11	246035	3724	1.51361	3088	636	82.9216
	2018-12-01	Saghata Upazila	10	271045	3703	1.36619	3012	691	81.3395
	2018-12-01	Fulchari Upazila	7	137795	1941	1.40861	1580	361	81.4013
	Kurigram Districts
	2018-12-01	Kurigram Sadar Upazila	8	259157	2994	1.15528	2626	368	87.7088
	2018-12-01	Ulipur Upazila	13	359626	4452	1.23795	3914	538	87.9155
	2018-12-01	Bhurungamari Upazila	10	197070	2616	1.32745	2204	412	84.2508
	2018-12-01	Char Rajibpur Upazila	3	70307	1150	1.63568	930	220	80.8696
	2018-12-01	Chilmari Upazila	6	114350	1460	1.27678	1271	189	87.0548
	2018-12-01	Fulbari Upazila	6	140392	1943	1.38398	1617	326	83.2218
	2018-12-01	Nageswari Upazila	15	322339	3159	0.980024	2516	643	79.6455
	2018-12-01	Rowmari Upazila	5	165815	2015	1.21521	1643	372	81.5385
	2018-12-01	Rajarhat Upazila	7	169579	1935	1.14106	1642	293	84.8579
	Rangpur Districts
	2018-12-01	Rangpur City Corporation (2nd Round)		716556	6720	0.937819	5680	1040	84.5238
	2018-12-01	Rangpur Sadar Upazila	5	204465	2893	1.41491	2435	458	84.1687
	2018-12-01	Gangachara Upazila	10	259856	3962	1.52469	3380	582	85.3104
	2018-12-01	Taraganj Upazila	5	119927	1320	1.10067	1130	190	85.6061
	2018-12-01	Badarganj Upazila	10	257846	2796	1.08437	2449	347	87.5894
	2018-12-01	Mitha Pukur Upazila	17	449612	5672	1.26153	4723	949	83.2687
	2018-12-01	Pirganj Upazila	15	345593	5234	1.5145	4470	764	85.4031
	2018-12-01	Kaunia Upazila	6	214317	2109	0.984056	1789	320	84.8269
	2018-12-01	Pirgachha Upazila	9	295050	3118	1.05677	2682	436	86.0167
	Dinajpur District
	2018-12-01	Dinajpur Sadar Upazila	10	424776	5402	1.27173	4339	1063	80.3221
	2018-12-01	Khansama Upazila	6	150792	1842	1.22155	1634	208	88.7079
	2018-12-01	Kaharole Upazila	6	137315	1731	1.26061	1394	337	80.5315
	2018-12-01	Ghoraghat Upazila	4	103119	2197	2.13055	1942	255	88.3933
	2018-12-01	Chirirbandar Upazila	12	265176	3535	1.33308	2872	663	81.2447
	2018-12-01	Nawabganj Upazila	9	204351	2945	1.44115	2511	434	85.2632
	2018-12-01	Parbatipur Upazila	10	325070	4521	1.39078	3703	818	81.9067
	2018-12-01	Fulbari Upazila	7	151939	3204	2.10874	2539	665	79.2447
	2018-12-01	Biral Upazila	10	231476	3441	1.48655	2747	694	79.8314
	2018-12-01	Birampur Upazila	7	150620	2865	1.90214	2400	465	83.7696
	2018-12-01	Birganj Upazila	11	269893	3111	1.15268	2391	720	76.8563
	2018-12-01	Bochaganj Upazila	6	145295	2049	1.41023	1696	353	82.7721
	2018-12-01	Hakimpur Upazila	3	83028	1613	1.94272	1359	254	84.2529
	Panchagarh District
	2019-01-01	Panchagarh sadar Upazila	10	229237	3109	1.35624	2278	831	73.2711
	2019-01-01	Debiganj Upazila	10	185960	3469	1.86545	2895	574	83.4534
	2019-01-01	Boda Upazila	10	200693	3787	1.88696	2977	810	78.611
	2019-01-01	Atwari Upazila	6	114938	1360	1.18325	973	387	71.5441
	2019-01-01	Tentulia Upazila	7	105368	1541	1.46249	1326	215	86.048
	Nilphamari District
	2019-01-01	Nilphamari Sadar Upazila	15	371879	6585	1.77074	5058	1527	76.8109
	2019-01-01	Kishoreganj Upazila	9	253192	3093	1.2216	2348	745	75.9134
	2019-01-01	Jaldhaka Upazila	12	354267	3936	1.11103	3126	810	79.4207
	2019-01-01	Dimla Upazila	10	223975	2807	1.25326	2289	518	81.5461
	2019-01-01	Domar Upazila	10	215699	2956	1.37043	2431	525	82.2395
	2019-01-01	Saidpur Upazila	5	232209	2450	1.05508	1906	544	77.7959
	Lalmonirhat District
	2019-01-01	Lalmonirhat Sadar Upazila	9	289272	5825	2.01368	4025	1800	69.0987
	2019-01-01	Aditmari Upazila	8	203742	2250	1.10434	1950	300	86.6667
	2019-01-01	Kaliganj Upazila	8	216868	2330	1.07439	2002	328	85.9227
	2019-01-01	Patgram Upazila	7	193185	1907	0.987137	1525	382	79.9685
	2019-01-01	Hatibandha Upazila	10	206276	3330	1.61434	2632	698	79.039
	Thakurgaon District
	2019-01-01	Thakurgaon Sadar Upazila	21	504428	9124	1.80878	7656	1468	83.9106
	2019-01-01	Pirganj Upazila	10	215754	4081	1.89151	3293	788	80.691
	2019-01-01	Baliadangi Upazila	8	169771	1956	1.15214	1683	273	86.0429
	2019-01-01	Ranisankail Upazila	8	196134	2663	1.35775	2278	385	85.5426
	2019-01-01	Haripur Upazila	6	128289	1799	1.4023	1460	339	81.1562
	Naogaon District
	2019-02-06	Naogaon sadar Upazila	12	354570	5798	1.63522	4813	985	83.0114
	2019-02-06	Patnitala Upazila	11	209440	4991	2.38302	4375	616	87.6578
	2019-02-06	Atrai Upazila	8	179799	2346	1.30479	2021	325	86.1466
	2019-02-06	Dhamoirhat Upazila	8	169693	3621	2.13385	3315	306	91.5493
	2019-02-06	Niamatpur Upazila	8	226614	5653	2.49455	4510	1143	79.7806
	2019-02-06	Porsha Upazila	6	121809	2983	2.44892	2532	451	84.881
	2019-02-06	Badalgachhi Upazila	8	186058	4174	2.24339	3205	969	76.7849
	2019-02-06	Mahadebpur Upazila	10	265763	4629	1.74178	3731	898	80.6006
	2019-02-06	Manda Upazila	14	352560	5662	1.60597	4678	984	82.621
	2019-02-06	Raninagar Upazila	8	181196	2682	1.48017	2223	459	82.8859
	2019-02-06	Sapahar Upazila	6	143853	2887	2.00691	2391	496	82.8195
	Bogra District
	2019-02-06	Bogra sadar Upazila	11	694077	5444	0.784351	4731	713	86.903
	2019-02-06	Dhupchanchia Upazila	6	160894	2669	1.65886	2159	510	80.8917
	2019-02-06	Adamdighi Upazila	6	187012	3458	1.84908	2996	462	86.6397
	2019-02-06	Sherpur Upazila	9	286308	4257	1.48686	3455	802	81.1604
	2019-02-06	Sariakandi Upazila	12	240083	3680	1.5328	3096	584	84.1304
	2019-02-06	Dhunat Upazila	10	270810	4698	1.7348	3959	739	84.2699
	2019-02-06	Gabtali Upazila	11	290190	4351	1.49936	3544	807	81.4525
	2019-02-06	Kahaloo Upazila	9	195565	3456	1.76719	2918	538	84.4329
	2019-02-06	Nandigram Upazila	5	168155	3107	1.8477	2656	451	85.4844
	2019-02-06	Shajahanpur Upazila	10	234365	3249	1.3863	2742	507	84.3952
	2019-02-06	Shibganj Upazila	12	352415	6662	1.89038	5415	1247	81.2819
	2019-02-06	Sonatala Upazila	7	167547	2931	1.74936	2315	616	78.9833
	Rajshahi District
	2019-02-06	Rajshahi City Corpor (2nd Round)	30	388811	7756	1.9948	6423	1333	82.8133
	2019-02-06	Bagha Upazila	6	169527	2622	1.54666	2059	563	78.5278
	2019-02-06	Baghmara Upazila	16	319968	5183	1.61985	3996	1187	77.0982
	2019-02-06	Godagari Upazila	9	279545	4074	1.45737	3027	1047	74.3004
	2019-02-06	Paba Upazila	8	262251	5272	2.01029	4201	1071	79.6851
	2019-02-06	Charghat Upazila	6	183921	3208	1.74423	2731	477	85.1309
	2019-02-06	Durgapur Upazila	7	167596	3696	2.2053	2881	815	77.9491
	2019-02-06	Tanore Upazila	7	173495	4036	2.32629	3436	600	85.1338
	2019-02-06	Mohanpur Upazila	6	152896	2554	1.67042	1947	607	76.2334
	2019-02-06	Puthia Upazila	6	188864	3259	1.72558	2574	685	78.9813
	Pabna District (2nd Round)
	2019-02-06	Sadar Upazila	10	590914	5345	0.904531	3891	1454	72.797
	2019-02-06	Sujanagar Upazila	10	251192	1530	0.609096	1132	398	73.9869
	2019-02-06	Ishwardi Upazila	7	313932	3407	1.08527	2562	845	75.1981
	2019-02-06	Bera Upazila	9	256793	3659	1.42488	2833	826	77.4255
	2019-02-06	Chatmahor Upazila	11	287790	4499	1.56329	3347	1152	74.3943
	2019-02-06	Santhia Upazila	10	323932	3987	1.23081	3210	777	80.5117
	2019-02-06	Atghoria Upazila	5	157254	2366	1.50457	1980	386	83.6855
	2019-02-06	Bhangura Upazila	6	132758	1815	1.36715	1464	351	80.6612
	2019-02-06	Faridpur Upazila	6	135491	3856	2.84595	3071	785	79.6421
	Sirajganj Districts (3rd Round)
	2019-02-28	Sadar Upazila	10	579000	5773	0.997064	4026	1747	69.7384
	2019-02-28	Ullahpara Upazila	14	540156	4415	0.817356	3249	1166	73.59
	2019-02-28	Sahazadpur Upazila	13	556350	5633	1.01249	3946	1687	70.0515
	2019-02-28	Kazipur Upazila	12	285309	3694	1.29474	2681	1013	72.5772
	2019-02-28	Raiganj Upazila	9	285445	3452	1.20934	2883	569	83.5168
	2019-02-28	Tarash Upazila	8	195964	3258	1.66255	2563	695	78.6679
	2019-02-28	Kamarkhand Upazila	4	133332	2225	1.66877	1823	402	81.9326
	2019-02-28	Belkuchi Upazila	7	285445	1750	0.613078	1309	441	74.8
	2019-02-28	Chawhali Upazila	7	147143	1920	1.30485	1486	434	77.3958
	Natore Districts
	2019-02-28	Natore sadar Upazila	12	400030	4019	1.00467	3219	800	80.0946
	2019-02-28	Gurudaspur Upazila	6	194228	2457	1.26501	2110	347	85.8771
	2019-02-28	Lalpur Upazila	10	242645	3903	1.60852	3175	728	81.3477
	2019-02-28	Singra Upazila	12	320818	5285	1.64735	4427	858	83.7654
	2019-02-28	Baraigram Upazila	7	244821	4685	1.91364	3570	1115	76.2006
	2019-02-28	Naldanga	5	129304	1989	1.53824	1591	398	79.9899
	2019-02-28	Bagatipara Upazila	5	118794	2333	1.9639	1908	425	81.7831
	Chapainawabganj Districts
	2019-02-28	Chapainawabganj sadar Upazila	14	452650	4825	1.06594	3748	1077	77.6788
	2019-02-28	Gomastapur Upazila	8	240123	3853	1.60459	3350	503	86.9452
	2019-02-28	Shibganj Upazila	15	508092	3327	0.654803	2541	786	76.3751
	2019-02-28	Bholahat Upazila	4	92149	1922	2.08575	1688	234	87.8252
	2019-02-28	Nachole Upazila	4	132308	3125	2.36191	2397	728	76.704
	Joypurhat Districts
	2019-02-28	Joypurhat sadar Upazila	9	400030	4460	1.11492	3794	666	85.0673
	2019-02-28	Akkelpur Upazila	5	128952	2131	1.65255	1712	419	80.3379
	2019-02-28	Panchbibi Upazila	8	215806	3870	1.79328	3450	420	89.1473
	2019-02-28	Khetlal Upazila	5	115918	2828	2.43966	2294	534	81.1174
	2019-02-28	Kalai Upazila	5	129329	3143	2.43024	2653	490	84.4098
	Faridpur Districts
	2019-03-13	Faridpur Sadar Upazila	11	413485	5110	1.23584	3816	1294	74.6771
	2019-03-13	Boalmari Upazila	11	233683	3763	1.6103	3169	594	84.2147
	2019-03-13	Bhanga Upazila	12	232386	3981	1.7131	3022	959	75.9106
	2019-03-13	Nagarkanda Upazila	9	177710	3057	1.72022	2488	569	81.387
	2019-03-13	Char Bhadrasan Upazila	4	76366	1329	1.7403	950	379	71.4823
	2019-03-13	Madhukhali Upazila	11	204492	2821	1.37952	2100	721	74.4417
	2019-03-13	Alfadanga Upazila	6	100598	2183	2.17002	1809	374	82.8676
	2019-03-13	Sadarpur Upazila	9	188757	2330	1.23439	1867	463	80.1288
	2019-03-13	Saltha Upazila	8	167466	2593	1.54837	2144	449	82.6841
	Gopalganj Districts
	2019-03-13	Gopalganj sadar Upazila	21	321934	5026	1.56119	4368	658	86.9081
	2019-03-13	Kotalipara Upazila	12	227025	3976	1.75135	3163	813	79.5523
	2019-03-13	Muksudpur Upazila	16	288205	4509	1.56451	3551	958	78.7536
	2019-03-13	Tungipara Upazila	5	99462	1608	1.6167	1343	265	83.5199
	2019-03-13	Kashiani Upazila	14	228647	3311	1.44808	2744	567	82.8753
	Madaripur Districts (2nd Round)
	2019-03-13	Madaripur Sadar Upazila	15	332020	4864	1.46497	4017	847	82.5863
	2019-03-13	Shibchar Upazila	19	324438	4593	1.41568	3758	835	81.8202
	2019-03-13	Kalkini Upazila	15	271796	4295	1.58023	3459	836	80.5355
	2019-03-13	Rajoir Upazila	11	218095	2747	1.25954	2318	429	84.383
	Rajbari Districts
	2019-03-13	Rajbari sadar Upazila	14	246389	5064	2.05529	3975	1089	78.4953
	2019-03-13	Goalando Upazila	4	138257	1474	1.06613	1288	186	87.3813
	2019-03-13	PanshaUpazila	10	241067	4009	1.66302	2887	1122	72.013
	2019-03-13	Kalukhali Upazila	7	155044	1973	1.27254	1667	306	84.4906
	2019-03-13	Balaiakandi Upazila	7	207086	2423	1.17005	1713	710	70.6975
	Satkhira District
	2019-04-04	Satkhira sadar Upazila	14	459987	6464	1.40526	5206	1258	80.5384
	2019-04-04	Tala Upazila	12	299040	5194	1.73689	4031	1163	77.6088
	2019-04-04	Assasuni Upazila	11	292292	2758	0.943577	2179	579	79.0065
	2019-04-04	Debhata Upazila	5	151717	1813	1.19499	1496	317	82.5152
	2019-04-04	Samnagar Upazila	12	318254	3546	1.1142	3000	546	84.6024
	2019-04-04	Kaliganj Upazila	12	325635	4216	1.2947	3434	782	81.4516
	2019-04-04	Kalaroa Upazila	12	262393	3157	1.20316	2604	553	82.4834
	Bagerhat District
	2019-04-04	Bagerhat sadar Upazila	10	286989	3282	1.1436	2813	469	85.7099
	2019-04-04	Fakirhat Upazila	8	145862	2706	1.85518	2254	452	83.2964
	2019-04-04	Mollahat Upazila	7	130078	3197	2.45776	2732	465	85.4551
	2019-04-04	Soronkhola Upazila	4	123786	1786	1.44281	1462	324	81.8589
	2019-04-04	Rampal Upazila	10	154538	2890	1.87009	2410	480	83.391
	2019-04-04	Morolganj Upazila	16	296538	5282	1.78122	4398	884	83.2639
	2019-04-04	Mongla Upazila	6	178530	2156	1.20764	1798	358	83.3952
	2019-04-04	Kachua Upazila	7	97011	1994	2.05544	1658	336	83.1494
	2019-04-04	Chitolmari Upazila	7	138810	1988	1.43217	1627	361	81.841
	Jessore District
	2019-04-04	Jessore sadar Upazila	15	615903	5488	0.891049	4150	1338	75.6195
	2019-04-04	Monirampur Upazila	17	382465	4519	1.18155	3671	848	81.2348
	2019-04-04	Avoynagar Upazila	8	262464	2722	1.03709	1935	787	71.0874
	2019-04-04	Bhagarpara Upazila	9	216897	2925	1.34857	2468	457	84.3761
	2019-04-04	Chaugacha Upazila	11	211065	2809	1.33087	2097	712	74.6529
	2019-04-04	Jikorgacaha Upazila	11	271014	3229	1.19145	2639	590	81.7281
	2019-04-04	Kesobpur Upazila	9	253291	2223	0.877647	1817	406	81.7364
	2019-04-04	Sarsha Upazila	12	302678	4961	1.63904	3781	1180	76.2145
	Khulna District
	2019-04-04	Khulna City Corporation (2nd Round)	31	388811	5107	1.31349	4214	893	82.5142
	2019-04-04	Phultola Upazila	4	133327	1456	1.09205	1224	232	84.0659
	2019-04-04	Dumuria Upazila	14	319968	3844	1.20137	3129	715	81.3996
	2019-04-04	Paikgacaha Upazila	10	247983	3142	1.26702	2670	472	84.9777
	2019-04-04	Rupsha Upazila	5	167604	2686	1.60259	2246	440	83.6188
	2019-04-04	Dhigholia Upazila	6	153921	1984	1.28897	1667	317	84.0222
	2019-04-04	Tarokanda Upazila	6	118554	2216	1.86919	1858	358	83.8448
	2019-04-04	Botiaghata Upazila	7	173495	2662	1.53434	2234	428	83.9219
	2019-04-04	Dakop Upazila	9	158896	2562	1.61238	2216	346	86.4949
	2019-04-04	Koira Upazila	7	192534	2876	1.49376	2426	450	84.3533
	Dhaka City Corporation
	Dhaka South City Corporation
	2019-05-14	DSCC Zone-1		2888110	1593	0.0551572	1432	161	89.8933
	2019-05-14	DSCC Zone-2		3223505	7125	0.221033	6204	921	87.0737
	2019-05-14	DSCC Zone-3		3536582	5648	0.159702	5056	592	89.5184
	2019-05-14	DSCC Zone-4		3202502	1902	0.0593911	1757	145	92.3764
	2019-05-14	DSCC Zone-5		2145563	9991	0.465659	9283	708	92.9136
	Dhaka North City Corporation
	2019-05-14	DNCC Zone-1		2521155	5023	0.199234	3898	1125	77.603
	2019-05-14	DNCC Zone-2		2932555	3813	0.130023	3427	386	89.8767
	2019-05-14	DNCC Zone-3		1965565	4160	0.211644	3738	422	89.8558
	2019-05-14	DNCC Zone-4		1256944	3787	0.301286	3236	551	85.4502
	2019-05-14	DNCC Zone-5		1125566	5470	0.485978	4904	566	89.6527
	Dhaka District
	2019-05-20	Savar Upazila	12	1442854	7422	0.514397	6736	686	90.7572
	2019-05-20	Keraniganj Upazila	12	603114	7259	1.20359	6162	1097	84.8877
	2019-05-20	Nawabganj Upazila	14	335757	3827	1.13981	3002	825	78.4426
	2019-05-20	Dohar Upazila	8	226439	1856	0.819647	1467	389	79.0409
	2019-05-20	Dhamrai Upazila	16	412418	6056	1.46841	5110	946	84.3791
	Meherpur District
	2019-12-08	Meherpur Sadar Upazila	5	307970	3886	1.26181	2954	932	76.0165
	2019-12-08	Mujibnagar Upazila	4	118971	2144	1.80212	1845	299	86.0541
	2019-12-08	Gangni Upazila	9	359528	5174	1.43911	4324	850	83.5717
	Kushtia District
	2019-12-08	Kushtia Sadar Upazila	14	508581	5965	1.17287	5092	873	85.3646
	2019-12-08	Kumarkhali Upazila	11	409506	3697	0.902795	2992	705	80.9305
	2019-12-08	Khoksa Upazila	9	160813	2539	1.57885	2052	487	80.8192
	2019-12-08	Mirpur Upazila	13	339312	4965	1.46326	3983	982	80.2216
	2019-12-08	Daulatpur Upazila	14	532752	5740	1.07742	4432	1308	77.2125
	2019-12-08	Bheramara Upazila	6	240100	2595	1.0808	2061	534	79.422
	Chuadanga District
	2019-12-08	Chuadanga Sadar Upazila	7	376722	5913	1.56959	4762	1151	80.5344
	2019-12-08	Alamdanga Upazila	15	415106	5285	1.27317	4314	971	81.6272
	2019-12-08	Damurhuda Upazila	7	306334	4802	1.56757	3843	959	80.0292
	2019-12-08	Jibannagar Upazila	6	224170	3611	1.61083	2775	836	76.8485
	Narail District
	2019-12-08	Narail Sadar Upazila	13	327446	4017	1.22677	3160	857	78.6657
	2019-12-08	Lohagara Upazila	12	272936	2778	1.01782	2197	581	79.0857
	2019-12-08	Kalia Upazila	14	249628	2889	1.15732	2462	427	85.2198
	Jhenaidah District
	2019-12-08	Jhenaidah Sadar Upazila	17	472982	9043	1.91191	7303	1740	80.7586
	2019-12-08	Shailkupa Upazila	14	433977	5280	1.21665	4324	956	81.8939
	2019-12-08	Harinakundu Upazila	8	237267	3774	1.59061	3209	565	85.0291
	2019-12-08	Kaliganj Upazila	11	302931	4440	1.46568	3670	770	82.6577
	2019-12-08	Kotchandpur Upazila	5	169345	2120	1.25188	1812	308	85.4717
	2019-12-08	Moheshpur Upazila	12	399016	4621	1.1581	3815	806	82.5579
	Magura Districts
	2019-12-08	Magura Sadar Upazila	13	397792	5739	1.44271	4482	1257	78.0972
	2019-12-08	Shalikha Upazila	7	196389	2128	1.08356	1170	958	54.9812
	2019-12-08	Sreepur Upazila	8	207716	2556	1.23053	1984	572	77.6213
	2019-12-08	Mohammadpur Upazila	8	226512	2680	1.18316	1321	1359	49.291
	Barisal Districts
	2019-12-30	Barisal Sadar Upazila	10	198739	3625	1.824	2907	718	80.1931
	2019-12-30	Muladi Upazila	7	174775	2379	1.36118	2013	366	84.6154
	2019-12-30	Gournodi Upazila	7	280517	2559	0.912244	2126	433	83.0793
	2019-12-30	Mehendiganj Upazila	13	304064	4404	1.44838	3656	748	83.0154
	2020-01-07	Barisal City Corporation (2nd Round)	30	1000000	4738	0.4738	3886	852	82.0177
	2020-01-07	Babuganj Upazila	6	146740	2333	1.58989	1691	642	72.4818
	2020-01-07	Wazirpur Upazila	9	234959	2631	1.11977	2348	283	89.2436
	2020-01-07	Bakerganj Upazila	14	313845	4734	1.50839	4248	486	89.7338
	2020-01-07	Agailjhara Upazila	5	149456	2702	1.80789	2371	331	87.7498
	2020-01-07	Hizla Upazila	6	187329	3025	1.61481	2531	494	83.6694
	2020-01-07	Banaripara Upazila	8	160498	1528	0.952037	1312	216	85.8639
	Jhalokati Districts
	2019-12-30	Rajapur Upazila	6	149112	2177	1.45998	1860	317	85.4387
	2019-12-30	Jhalokati Sadar Upazila	10	194020	3197	1.64777	2727	470	85.2987
	2019-12-30	Nalchity Upazila	10	214418	2939	1.37069	2531	408	86.1177
	2019-12-30	Kathalia Upazila	6	124271	2306	1.85562	1886	420	81.7866
	Patuakhali Districts
	2019-12-30	Patuakhali Sadar Upazila	12	322713	4587	1.42139	3889	698	84.7831
	2019-12-30	Kolapara Upazila	12	237831	5153	2.16666	4684	469	90.8985
	2020-01-07	Mirjaganj Upazila	6	118054	2102	1.78054	1748	354	83.1589
	2019-12-30	Golachipa Upazila	12	258525	4982	1.92709	4292	690	86.1501
	2020-01-07	Dosmina Upazila	6	118180	2437	2.06211	2159	278	88.5925
	2020-01-07	Rangabali Upazila	5	104128	3083	2.96078	2659	424	86.2472
	2020-01-07	Dumki Upazila	5	123525	1075	0.870269	942	133	87.6279
	2019-12-30	Baufol Upazila	14	304951	4388	1.43892	3438	950	78.35
	Pirojpur Districts
	2019-12-30	Mothbaria Upazila	11	262841	4000	1.52183	3453	547	86.325
	2019-12-30	Najirpur Upazila	9	180408	2969	1.64571	2559	410	86.1906
	2019-12-30	Pirojpur Sadar Upazila	7	163470	1932	1.18187	1625	307	84.1097
	2020-01-07	Necharabad Upazila	10	212232	2189	1.03142	1922	267	87.8026
	2020-01-07	Indukani Upazila	3	77674	1548	1.99294	1349	199	87.1447
	2020-01-07	Kaukhali Upazila	5	70515	2166	3.07169	1963	203	90.6279
	2020-01-07	Bhandaria Upazila	7	164618	2004	1.21736	1652	352	82.4351
	Barguna Districts
	2019-12-30	Barguna Sadar Upazila	10	237560	4513	1.89973	3661	852	81.1212
	2019-12-30	Pathorghata Upazila	7	163927	3458	2.10948	2958	500	85.5408
	2019-12-30	Betagi Upazila	7	121751	2882	2.36713	2453	429	85.1145
	2020-01-07	Amtoly Upazila	7	152562	3544	2.32299	3106	438	87.6411
	2020-01-07	Taltoly Upazila	7	88004	2671	3.03509	2318	353	86.784
	2020-01-07	Bamna Upazila	4	79564	2206	2.77261	1926	280	87.3073
	Bhola Districts
	2019-12-30	Bhola Sadar Upazila	13	409460	3475	0.848679	2660	815	76.5468
	2019-12-30	Borhanuddin Upazila	9	233860	1448	0.619174	1044	404	72.0994
	2019-12-30	Monpur Upazila	4	125000	2700	2.16	2050	650	75.9259
	2020-01-07	Doulatkhan Upazila	9	173253	1549	0.894068	1241	308	80.1162
	2020-01-07	Chorfession Upazila	21	456437	4505	0.986993	3502	1003	77.7358
	2019-12-30	Lalmohon Upazila	9	283889	2057	0.724579	1577	480	76.665
	2020-01-07	Tojumudden Upazila	5	136240	2474	1.81591	1813	661	73.2821
	Brahmanbaria District
	2020-01-27	Brahmanbaria Sadar Upazila	11	626392	4102	0.654861	3374	728	82.2526
	2020-01-27	Nabinagor Upazila	21	534000	4866	0.911236	3809	1057	78.2778
	2020-01-27	Ashugonj Upazila	8	216784	1289	0.594601	1050	239	81.4585
	2020-02-04	Sarail Upazila	9	373341	2604	0.697486	2175	429	83.5253
	2020-02-04	Nasirnagar Upazila	13	370813	2726	0.735141	2158	568	79.1636
	2020-02-04	Akhaura Upazila	5	156382	1888	1.2073	1500	388	79.4492
	2020-02-04	Bijoynagar Upazila	10	308696	2019	0.654042	1623	396	80.3863
	2020-01-27	Bancharampur Upazila	13	358116	3381	0.944107	2649	732	78.3496
	2020-02-04	Kasba Upazila	10	383065	3979	1.03873	2977	1002	74.8178
	Feni District
	2020-02-04	Chagolnayya Upazila	5	204628	1608	0.785816	1235	373	76.8035
	2020-01-27	Dagonbhyiaa Upazila	8	259479	1892	0.729153	1827	65	96.5645
	2020-02-04	Fulgazi Upazila	6	143469	2194	1.52925	1769	425	80.629
	2020-02-04	Parshuram Upazila	3	121274	1457	1.20141	1100	357	75.4976
	2020-01-27	Feni Sadar Upazila	12	615175	4833	0.78563	4102	731	84.8748
	2020-02-04	Sonagazi Upazila	6	143469	2058	1.43446	1500	558	72.8863
	Noakhali District
	2020-01-27	Noakhali Sadar Upazila	13	641338	6153	0.959401	4978	1175	80.9036
	2020-02-04	Companiganj Upazila	8	300694	3514	1.16863	2948	566	83.893
	2020-02-04	Begumganj Upazila	16	571588	4387	0.767511	3696	691	84.2489
	2020-02-04	Hatia Upazila	11	442955	6066	1.36944	5082	984	83.7784
	2020-01-27	Subarnachar Upazila	8	346800	3528	1.0173	3210	318	90.9864
	2020-01-27	Kabirhat Upazila	7	236332	2537	1.07349	2190	347	86.3224
	2020-01-27	Senbug Upazila	9	339472	2976	0.876656	2482	494	83.4005
	2020-01-27	Chatkhil Upazila	9	258469	2474	0.957175	1787	687	72.2312
	2020-02-04	Sonaimuri Upazila	10	349015	2591	0.742375	2010	581	77.5762
	Chandpur District
	2020-01-27	Sharasti Upazila	10	303013	1992	0.657398	1495	497	75.0502
	2020-02-04	Haimchar Upazila	6	131490	1989	1.51266	1599	390	80.3922
	2020-02-04	Hajiganj Upazila	11	392840	2208	0.562061	1923	285	87.0924
	2020-01-27	Chandpur Sadar Upazila	14	440430	3544	0.804668	2966	578	83.6907
	2020-02-04	Kachua Upazila	12	458566	2258	0.492405	1814	444	80.3366
	2020-01-27	Matlab South Upazila	14	595881	3033	0.508994	2430	603	80.1187
	2020-02-04	Faridganj Upazila	15	613502	3271	0.533169	2737	534	83.6747
	2020-01-27	Matlab North Upazila	6	252060	1804	0.715703	1530	274	84.8115
	Cumilla District
	2020-01-27	Muradnargar Upazila	22	695679	5398	0.775933	3957	1441	73.3049
	2020-01-27	Monohorgonj Upazila	11	307836	3057	0.993061	2423	634	79.2607
	2020-01-27	Chowddagram Upazila	13	514345	3588	0.697586	2764	824	77.0346
	2020-01-27	Burichang Upazila	9	366798	2180	0.594333	1539	641	70.5963
	2020-02-04	Nanglkot Upazila	12	443582	4056	0.914374	3382	674	83.3826
	2020-02-04	Brahmanpara Upazila	8	268214	1610	0.600267	1159	451	71.9876
	2020-02-04	Homna Upazila	9	247663	2414	0.974712	1821	593	75.435
	2020-02-04	Laksam Upazila	7	331411	1767	0.533175	1400	367	79.2303
	2020-01-27	Comilla City Corporation (2nd Round)	30	700000	2393	0.341857	2102	291	87.8395
	2020-01-27	Comilla Sadar Upazila	6	631627	3047	0.482405	2327	720	76.3702
	2020-01-27	Lalmai Upazila	9	227576	2058	0.904313	1687	371	81.9728
	2020-01-27	Barura Upazila	15	486733	3717	0.763663	3175	542	85.4183
	2020-01-27	Debidwar Upazila	13	513495	2627	0.511592	2272	355	86.4865
	2020-02-04	Chandina Upazila	13	366984	3473	0.946363	2852	621	82.1192
	2020-02-04	Meghna Upazila	8	155665	2207	1.41779	1857	350	84.1414
	2020-02-04	South Sadar Upazila	14	498040	1397	0.2805	1126	271	80.6013
	2020-02-04	Titas Upazila	9	207877	2248	1.08141	1944	304	86.4769
	2020-02-04	Daudkandi Upazila	15	415923	3125	0.751341	2755	370	88.16
	Shariatpur District
	2020-03-12	Shariatpur Sadar Upazila	11	199016	3520	1.7687	3029	491	86.0511
	2020-03-12	Naria Upazila	14	231644	2831	1.22213	2386	445	84.2812
	2020-03-12	Zajira Upazila	12	194019	3396	1.75034	2597	799	76.4723
	2020-03-12	Gosairhat Upazila	8	157665	1778	1.12771	1339	439	75.3093
	2020-03-12	Bhedarganj Upazila	13	303535	2755	0.907638	2366	389	85.8802
	2020-03-12	Damudya Upazila	7	116643	1934	1.65805	1484	450	76.7322
	Laksmipur District
	2020-03-12	Lakshmipur Sadar Upazila	21	684425	4586	0.670052	3817	769	83.2316
	2020-03-12	Kamalnagar Upazila	9	222915	2289	1.02685	1643	646	71.7781
	2020-03-12	Raipur Upazila	10	275160	2307	0.838421	1747	560	75.7261
	2020-03-12	Ramgati Upazila	8	261002	3665	1.4042	2988	677	81.528
	2020-03-12	Ramganj Upazila	10	342027	2256	0.659597	1777	479	78.7677
	Chittagong District
	2020-03-12	Rangunia Upazila	15	340000	3047	0.896176	2516	531	82.573
	2020-03-12	Sitakunda Upazila	9	335178	2445	0.729463	1988	457	81.3088
	2020-03-12	Mirsharai Upazila	16	368950	3527	0.955956	2644	883	74.9646
	2020-03-12	Patiya Upazila	17	396535	4124	1.04001	3296	828	79.9224
	2020-03-12	Sandwip Upazila	15	278605	5733	2.05775	4524	1209	78.9116
	2020-03-12	Banshkhali Upazila	14	431162	5397	1.25173	4150	1247	76.8946
	2020-03-12	Boalkhali Upazila	9	235483	2095	0.889661	1420	675	67.7804
	2020-03-12	Anwara Upazila	11	259022	1987	0.767116	1460	527	73.4776
	2020-03-12	Satkania Upazila	17	384806	3465	0.900454	2667	798	76.9697
	2020-03-12	Lohagara Upazila	9	279913	2639	0.942793	1948	691	73.8158
	2020-03-12	Hathazari Upazila	14	431748	2622	0.607299	2190	432	83.524
	2020-03-12	Fatikchhari Upazila	18	526203	4941	0.938991	3797	1144	76.8468
	2020-03-12	Raozan Upazila	14	322840	3872	1.19936	2687	1185	69.3957
	2020-03-12	Chandanaish Upazila	8	192600	2907	1.50935	2124	783	73.065
	2020-03-12	Karnafuli Upazila	5	127748	2321	1.81686	1790	531	77.1219
	2020-03-12	Ctg City Corporation (2nd Round)	41	2068082	13826	0.668542	11118	2708	80.4137
	Nilphamari District (2nd Round)
	2020-06-18	Nilphamari Sadar Upazila	15	371879	6704	1.80274	4910	1794	73.2399
	2020-06-18	Kishoreganj Upazila	9	253192	4155	1.64105	3003	1152	72.2744
	2020-06-18	Jaldhaka Upazila	12	354267	3922	1.10707	2774	1148	70.7292
	2020-06-18	Dimla Upazila	10	223975	4591	2.04978	3300	1291	71.8798
	2020-06-18	Domar Upazila	10	215699	2990	1.38619	2177	813	72.8094
	2020-06-18	Saidpur Upazila	5	232209	4357	1.87633	3169	1188	72.7335
	Dhaka City Corporation (2nd Round)
	Dhaka South City Corporation
	2020-12-14	DSCC Zone-1		2888110	2179	0.0754473	1972	207	90.5002
	2020-12-14	DSCC Zone-2		3223505	6158	0.191034	6130	28	99.5453
	2020-12-14	DSCC Zone-3		3536582	5066	0.143246	4620	446	91.1962
	2020-12-14	DSCC Zone-4		3202502	2098	0.0655113	1963	135	93.5653
	2020-12-14	DSCC Zone-5		2145563	14982	0.698278	13762	1220	91.8569
	Dhaka North City Corporation
	2020-12-14	DNCC Zone-1		2521155	6954	0.275826	6020	934	86.5689
	2020-12-14	DNCC Zone-2		2932555	4248	0.144857	3710	538	87.3352
	2020-12-14	DNCC Zone-3		1965565	3949	0.200909	3605	344	91.2889
	2020-12-14	DNCC Zone-4		1256944	3641	0.289671	3206	435	88.0527
	2020-12-14	DNCC Zone-5		1125566	5469	0.485889	4592	877	83.9642
	Khagrachhari District
	2021-01-01	Khagrachori sadar Upazila		111833	4623	4.13384	4023	600	87.0214
	2021-01-01	Dhighinala Upazila		107363	2237	2.08359	1977	260	88.3773
	2021-01-01	Panchori Upazila		62198	2095	3.36828	1831	264	87.3986
	2021-01-01	Mohalchori Upazila		80846	1648	2.03844	1432	216	86.8932
	2021-01-01	Manikchori Upazila		61589	1831	2.97293	1439	392	78.5909
	2021-01-01	Ramgor Upazila		71677	1449	2.02157	1183	266	81.6425
	2021-01-01	Matiranga Upazila		108753	2478	2.27856	2085	393	84.1404
	2021-01-01	Guimara Upazila		42202	1919	4.54718	1615	304	84.1584
	2021-01-01	Laxichori Upazila		42202	1472	3.48799	1200	272	81.5217
	Rangamati District
	2021-01-01	Rangamati Sadar Upazila		124728	3349	2.68504	2844	505	84.9209
	2021-01-01	Kaptai Upazila		66135	1796	2.71566	1504	292	83.7416
	2021-01-01	Kawkhali Upazila		49277	3448	6.99718	2541	907	73.6949
	2021-01-01	Baghaichori Upazila		80846	2014	2.49116	1497	517	74.3297
	2021-01-01	Borokol Upazila		39781	1449	3.64244	1122	327	77.4327
	2021-01-01	Rajostholi Upazila		20637	1572	7.61739	1188	384	75.5725
	2021-01-01	Bilaichori Upazila		28525	1320	4.62752	1019	301	77.197
	2021-01-01	Longdu Upazila		84477	1856	2.19705	1683	173	90.6789
	2021-01-01	Jurachori Upazila		22365	2118	9.47015	1535	583	72.474
	2021-01-01	Naniarchar Upazila		42965	1328	3.09089	1058	270	79.6687
	Bandarban District
	2021-01-31	Bandarban sadar Upazila		68693	3125	4.54923	2717	408	86.944
	2021-01-31	Naikhangchori Upazila		54300	2738	5.04236	2257	481	82.4324
	2021-01-31	Alikadam Upazila		50360	3414	6.77919	3021	393	88.4886
	2021-01-31	Rowachori Upazila		22269	2416	10.8492	1682	734	69.6192
	2021-01-31	Lama Upazila		113413	4171	3.67771	3565	606	85.4711
	2021-01-31	Thanchi Upazila		30209	2123	7.02771	1760	363	82.9016
	2021-01-31	Ruma Upazila		30209	2446	8.09692	2117	329	86.5495
	Coxs bazar District
	2021-01-31	Cox's Bazar Sadar Upazila		522435	6735	1.28916	5584	1151	82.9102
	2021-01-31	Chokoria Upazila		478465	5726	1.19674	4531	1195	79.1303
	2021-01-31	Pekua Upazila		171538	1589	0.926325	1339	250	84.2668
	2021-01-31	Ukhia Upazila		155187	1053	0.678536	892	161	84.7104
	2021-01-31	Kutubdia Upazila		133888	1344	1.00382	1189	155	88.4673
	2021-01-31	Ramu Upazila		266240	5129	1.92646	4072	1057	79.3917
	2021-01-31	Teknaf Upazila		263389	4733	1.79696	3758	975	79.4
	2021-01-31	Moheshkhali Upazila		321218	4697	1.46225	3855	842	82.0737
	Sylhet Districts (2nd Round)
	2021-02-19	Sylhet City Corporation	27	485138	3181	0.65569	2362	819	74.2534
	2021-02-19	Sylhet sadar Upazila	8	493784	3470	0.702736	2989	481	86.1383
	2021-02-19	Dakshin Surma Upazila	10	188675	1071	0.567643	834	237	77.8711
	2021-02-19	Zakiganj Upazila	9	266085	1284	0.482553	1089	195	84.8131
	2021-02-19	Companiganj Upazila	6	214652	2442	1.13766	2040	402	83.5381
	2021-02-19	Jaintapur Upazila	6	121458	1332	1.09668	1108	224	83.1832
	2021-02-19	Goawainghat Upazila	9	207170	3276	1.58131	2727	549	83.2418
	2021-02-19	Fenchuganj Upazila	5	95161	1542	1.62041	1082	460	70.1686
	2021-02-19	Biswanath Upazila	8	189775	1286	0.677645	1072	214	83.3593
	2021-02-19	Beanibazar Upazila	10	210673	1635	0.776084	1376	259	84.159
	2021-02-19	Balaganj Upazila	14	256239	1253	0.488997	1105	148	88.1883
	2021-02-19	Golapganj Upazila	11	263953	2048	0.775896	1628	420	79.4922
	2021-02-19	Osmaninagar Upazila	8	230546	1436	0.622869	1142	294	79.5265
	2021-02-19	Kanaighat Upazila	9	427913	1230	0.287442	998	232	81.1382
	Sunamganj Districts (2nd Round)
	2021-02-19	Sunamganj Sadar Upazila	9	219338	3541	1.6144	2673	868	75.4872
	2021-02-19	Doara Bazar Upazila	9	188675	3280	1.73844	2223	1057	67.7744
	2021-02-19	Chatok Upazila	13	266085	4751	1.78552	3815	936	80.2989
	2021-02-19	South Sunamganj Upazila	8	183825	1629	0.886169	1277	352	78.3917
	2021-02-19	Jamalganj Upazila	6	167354	1303	0.778589	988	315	75.825
	2021-02-19	Tahirpur Upazila	7	155198	2484	1.60054	1937	547	77.9791
	2021-02-19	Bishomvorpur Upazila	5	140855	3053	2.16748	2237	816	73.2722
	2021-02-19	Shalla Upazila	4	110056	2118	1.92447	1353	765	63.881
	2021-02-19	Jagonnathpur Upazila	8	259449	2988	1.15167	2152	836	72.0214
	2021-02-19	Dherai Upazila	9	243690	2701	1.10838	2225	476	82.3769
	2021-02-19	Dharmpasa Upazila	10	197935	1715	0.866446	1284	431	74.8688
	Moulvibazar Districts (2nd Round)
	2021-03-11	Moulvibazar Sadar Upazila	12	281593	3197	1.13533	2470	727	77.2599
	2021-03-11	Rajnagar Upazila	8	232666	2381	1.02336	1589	792	66.7367
	2021-03-11	Sreemangal Upazila	9	287980	4304	1.49455	3509	795	81.5288
	2021-03-11	Kamalganj Upazila	9	259130	2702	1.04272	2344	358	86.7506
	2021-03-11	Kulaura Upazila	13	360195	4127	1.14577	3043	1084	73.7339
	2021-03-11	Juri Upazila	6	148958	2034	1.36549	1777	257	87.3648
	2021-03-11	Barlekha Upazila	10	267743	2090	0.780599	1743	347	83.3971
	Habiganj Districts (2nd Round)
	2021-03-11	Habiganj Sadar Upazila	10	275074	1476	0.536583	1232	244	83.4688
	2021-03-11	Baniachong Upazila	15	334605	2859	0.85444	2461	398	86.079
	2021-03-11	Ajmiriganj Upazila	5	99240	2063	2.0788	1478	585	71.6432
	2021-03-11	Nabiganj Upazila	13	285040	2460	0.863037	2021	439	82.1545
	2021-03-11	Madhabpur Upazila	11	319016	2051	0.642914	1640	411	79.961
	2021-03-11	Lakhai Upazila	6	148811	1506	1.01202	1322	184	87.7822
	2021-03-11	Chunarughat Upazila	10	267020	2614	0.978953	2252	362	86.1515
	2021-03-11	Shayestaganj Upazila	4	68869	696	1.01061	507	189	72.8448
	2021-03-11	Bahubal Upazila	7	197997	1590	0.803042	1301	289	81.8239
	Jamalpur Districts (2nd Round)
	2021-03-11	Sadar Upazila	15	615072	5855	0.951921	5170	685	88.3006
	2021-03-11	Madarganj Upazila	7	263608	1855	0.703696	1542	313	83.1267
	2021-03-11	Shorshabari Upazila	8	285445	2609	0.914011	2017	592	77.3093
	2021-03-11	Bokshiganj Upazila	7	218930	2768	1.26433	2158	610	77.9624
	2021-03-11	Islampur Upazila	12	289337	3865	1.33581	2963	902	76.6624
	2021-03-11	Deowanganj Upazila	8	258133	2106	0.815858	1732	374	82.2412
	2021-03-11	Melandah Upazila	11	292347	2846	0.973501	2173	673	76.3528
	kishoreganj Districts (2nd Round)
	2021-03-28	Sadar Upazila	11	300317	4285	1.42683	3324	961	77.5729
	2021-03-28	Itna Upazila	9	148040	2432	1.6428	2024	408	83.2237
	2021-03-28	Katiadi Upazila	11	134529	2846	2.11553	2270	576	79.7611
	2021-03-28	Bhairab Upazila	7	95950	2241	2.33559	1935	306	86.3454
	2021-03-28	Tarail Upazila	7	152190	2348	1.54281	1652	696	70.3578
	2021-03-28	Hossainpur Upazila	6	165070	2414	1.46241	1889	525	78.2519
	2021-03-28	Pakundia Upazila	11	210355	2085	0.991182	1775	310	85.1319
	2021-03-28	Kuliarchar Upazila	6	165070	1227	0.743321	776	451	63.2437
	2021-03-28	Karimgonj Upazila	11	251882	2958	1.17436	2328	630	78.7018
	2021-03-28	Bajitpur Upazila	11	500052	3706	0.741123	3066	640	82.7307
	2021-03-28	Austagram Upazila	8	308778	2541	0.822921	2155	386	84.8091
	2021-03-28	Mithamoin Upazila	6	574452	1701	0.296108	1441	260	84.7149
	2021-03-28	Nikli Upazila	7	156743	1477	0.942307	1332	145	90.1828
	Netrokona Districts (2nd Round)
	2021-03-28	Sadar Upazila	12	349540	3972	1.13635	3297	675	83.006
	2021-03-28	Barhatta Upazila	7	180449	2795	1.54891	2155	640	77.102
	2021-03-28	Durgapur Upazila	7	224893	1317	0.585612	1009	308	76.6135
	2021-03-28	Kendua Upazila	13	314450	2635	0.837971	2341	294	88.8425
	2021-03-28	Atpara Upazila	7	132440	2253	1.70115	2069	184	91.8331
	2021-03-28	Madan Upazila	8	142472	2225	1.56171	1836	389	82.5169
	2021-03-28	Phurbadhala Upazila	11	310838	2799	0.900469	2388	411	85.3162
	2021-03-28	Kalmakandha Upazila	8	271912	3135	1.15295	2720	415	86.7624
	2021-03-28	Mohanganj Upazila	7	243535	1686	0.692303	1343	343	79.656
	2021-03-28	Khalijuari Upazila	6	94660	1520	1.60575	1219	301	80.1974
	Dinajpur District (2nd Round)
	2021-05-03	Dinajpur Sadar Upazila	10	424776	2636	0.620562	1765	871	66.9575
	2021-05-03	Khansama Upazila	6	150792	1761	1.16783	1356	405	77.0017
	2021-05-03	Kaharole Upazila	6	137315	1923	1.40043	1394	529	72.4909
	2021-05-03	Ghoraghat Upazila	4	103119	2636	2.55627	2145	491	81.3733
	2021-05-03	Chirirbandar Upazila	12	265176	3045	1.14829	2499	546	82.069
	2021-05-03	Nawabganj Upazila	9	204351	3066	1.50036	2615	451	85.2903
	2021-05-03	Parbatipur Upazila	10	325070	2134	0.656474	1636	498	76.6635
	2021-05-03	Fulbari Upazila	7	151939	3116	2.05082	2279	837	73.1386
	2021-05-03	Biral Upazila	10	231476	2865	1.23771	2218	647	77.4171
	2021-05-03	Birampur Upazila	7	150620	1407	0.934139	1009	398	71.7129
	2021-05-03	Birganj Upazila	11	269893	3217	1.19195	2384	833	74.1063
	2021-05-03	Bochaganj Upazila	6	145295	3070	2.11294	2420	650	78.8274
	2021-05-03	Hakimpur Upazila	3	83028	1839	2.21492	1485	354	80.7504
	Panchagarh District (2nd Round)
	2021-05-03	Panchagarh sadar Upazila	10	229237	2245	0.979336	1812	433	80.7127
	2021-05-03	Debiganj Upazila	10	185960	3069	1.65035	2041	1028	66.5037
	2021-05-03	Boda Upazila	10	200693	2956	1.4729	2405	551	81.3599
	2021-05-03	Atwari Upazila	6	114938	1428	1.24241	1022	406	71.5686
	2021-05-03	Tentulia Upazila	7	105368	1150	1.09141	878	272	76.3478
	Nilphamari District (3rd Round)
	2021-05-03	Nilphamari Sadar Upazila	15	371879	5130	1.37948	4051	1079	78.9669
	2021-05-03	Kishoreganj Upazila	9	253192	2635	1.04071	2065	570	78.3681
	2021-05-03	Jaldhaka Upazila	12	354267	2601	0.734192	2164	437	83.1988
	2021-05-03	Dimla Upazila	10	223975	2475	1.10503	1922	553	77.6566
	2021-05-03	Domar Upazila	10	215699	2725	1.26333	1992	733	73.1009
	2021-05-03	Saidpur Upazila	5	232209	2885	1.24242	2414	471	83.6742
	Munshiganj Districts (2nd Round)
	2021-05-20	Sadar Upazila	9	399560	3323	0.831665	2639	684	79.4162
	2021-05-20	Serajdikhan Upazila	14	241804	2696	1.11495	2007	689	74.4436
	2021-05-20	Tongibari Upazila		197173	2006	1.01738	1603	403	79.9103
	2021-05-20	Srinagar Upazila	14	284563	2914	1.02403	2303	611	79.0323
	2021-05-20	Louhajanj Upazila	10	212612	1868	0.878596	1515	353	81.1028
	2021-05-20	Gojari Upazila	8	157988	1559	0.986784	1227	332	78.7043
	Manikganj Districts (3rd Round)
	2021-05-20	Sadar Upazila	10	261622	4407	1.68449	3387	1020	76.855
	2021-05-20	Shibaloy Upazila	7	171873	3429	1.99508	3067	362	89.443
	2021-05-20	Shingair Upazila	11	140834	3725	2.64496	2887	838	77.5034
	2021-05-20	Saturia Upazila	9	171494	2778	1.61988	2470	308	88.9129
	2021-05-20	Doulothpur Upazila	8	427913	3046	0.711827	2322	724	76.2311
	2021-05-20	Horirampur Upazila	13	139318	3637	2.61057	3301	336	90.7616
	2021-05-20	Ghior Upazila	7	146292	2338	1.59817	1833	505	78.4003
	Narsingdi Districts (2nd Round)
	2021-05-20	Sadar Upazila	14	765667	5109	0.667261	4375	734	85.6332
	2021-05-20	Belabo Upazila	8	190086	1364	0.71757	1193	171	87.4633
	2021-05-20	Monohardi Upazila	12	284563	2022	0.710563	1693	329	83.729
	2021-05-20	Palash Upazila	4	212612	2164	1.01782	1689	475	78.0499
	2021-05-20	Raipura Upazila	24	454860	3964	0.871477	3476	488	87.6892
	2021-05-20	Shibpur Upazila	9	315667	2141	0.678246	1699	442	79.3554
	Narayanganj Districts (2nd Round)
	2021-05-20	Sadar Upazila	7	1323600	3913	0.295633	3145	768	80.3731
	2021-05-20	Narayanganj City (3rd Round)	27	11060000	6903	0.0624141	4946	1957	71.65
	2021-05-20	Araihazar Upazila	10	376550	2572	0.683043	2311	261	89.8523
	2021-05-20	Bandar Upazila	5	312841	3039	0.97142	2386	653	78.5127
	2021-05-20	Rupganj Upazila	5	239660	3145	1.31228	2600	545	82.6709
	2021-05-20	Sonargaon Upazila	10	345800	3325	0.961538	2716	609	81.6842
	Sherpur Districts (2nd Round)
	2021-06-01	Sadar Upazila	14	399560	5212	1.30443	4563	649	87.548
	2021-06-01	Sribordi Upazila	10	259648	3318	1.27788	2416	902	72.8149
	2021-06-01	Jhinaigati Upazila	7	157988	3566	2.25713	3173	393	88.9792
	2021-06-01	Nalitabari Upazila	12	284563	3186	1.11961	2866	320	89.9561
	2021-06-01	Nakla Upazila	9	198080	2270	1.146	1992	278	87.7533
	Mymensingh Districts (2nd Round)
	2021-06-01	Mymensingh City Corporation	33	471858	3429	0.726702	2771	658	80.8107
	2021-06-01	Sadar Upazila	13	674452	3496	0.518347	2480	1016	70.9382
	2021-06-01	Fulbaria Upazila	13	448467	2795	0.623234	2022	773	72.3435
	2021-06-01	Trishal Upazila	12	435803	2946	0.675994	2422	524	82.2132
	2021-06-01	Bhaluka Upazila	11	308778	2949	0.955055	2416	533	81.9261
	2021-06-01	Muktagacha Upazila	10	366397	3588	0.979266	2743	845	76.4493
	2021-06-01	Dhobaura Upazila	7	427913	3219	0.752256	2692	527	83.6285
	2021-06-01	Phulpur Upazila	10	315272	2313	0.733652	1936	377	83.7008
	2021-06-01	Haluaghat Upazila	12	290043	3576	1.23292	2571	1005	71.896
	2021-06-01	Gouripur Upazila	10	300265	3469	1.15531	3119	350	89.9106
	2021-06-01	Gafargaon Upazila	15	413488	3875	0.937149	3107	768	80.1806
	2021-06-01	Iswarganj Upazila	11	574452	5211	0.907125	4007	1204	76.895
	2021-06-01	Nandail Upazila	12	420717	3937	0.935783	2931	1006	74.4475
	2021-06-01	Tarakanda Upazila	10	412261	2408	0.584096	2166	242	89.9502
	Gazipur Districts (3rd Round)
	2021-06-01	Sadar Upazila	4	194997	1573	0.806679	1186	387	75.3973
	2021-06-01	Kapasia Upazila	9	255957	2327	0.909137	1690	637	72.6257
	2021-06-01	Sreepur Upazila	11	321454	2653	0.825312	1989	664	74.9717
	2021-06-01	Kaliganj Upazila	7	239660	2177	0.90837	1699	478	78.0432
	2021-06-01	Kaliakoir Upazila	8	492792	3994	0.810484	3429	565	85.8538
	Madaripur Districts (3rd Round)
	2021-06-15	Madaripur Sadar Upazila	15	332020	3193	0.961689	2461	732	77.0749
	2021-06-15	Shibchar Upazila	19	324438	3646	1.12379	3150	496	86.3961
	2021-06-15	Kalkini Upazila	15	271796	3341	1.22923	2541	800	76.0551
	2021-06-15	Rajoir Upazila	11	218095	2601	1.1926	2075	526	79.777
	Dhaka District (2nd Round)
	2021-06-15	Savar Upazila	12	1442854	5925	0.410644	5332	593	89.9916
	2021-06-15	Keraniganj Upazila	12	603114	6159	1.0212	4890	1269	79.396
	2021-06-15	Nawabganj Upazila	14	335757	4644	1.38314	3584	1060	77.1748
	2021-06-15	Dhamrai Upazila	16	412418	5868	1.42283	4252	1616	72.4608
	2021-10-01	Rangpur Sadar	5	204465	2139	1.04614	1714	425	80.1309
	2021-10-01	Mithapukur Upazila	17	527457	6585	1.24844	4814	1771	73.1055
	2021-11-01	Palashbari Upazila	9	231755	4307	1.85843	3383	924	78.5466
	2021-11-01	Chandina Upazila	13	350273	2400	0.68518	1919	481	79.9583
	2021-11-01	Titas Upazila	9	184617	2589	1.40236	1995	594	77.0568
	2021-12-01	Dohar Upazila	8	226439	2646	1.16853	2073	573	78.3447
	2021-12-01	Sakhipur Upazila	8	275986	2158	0.781924	1987	171	92.076
	2021-12-01	Kalihati Upazila	13	410293	4132	1.00709	3463	669	83.8093
	2022-01-01	Brahmanbaria Sadar Upazila	11	521994	4385	0.840048	3269	1116	74.5496
	2022-01-01	Laksam Upazila	8	275646	1083	0.392895	964	119	89.012
	2022-01-01	Brahmanpara Upazila	8	202311	1951	0.964357	1375	576	70.4767
	2022-04-01	Jessore sadar Upazila	15	615903	4934	0.8011	3953	981	80.1176
	2022-04-01	Manirampur Upazila	17	435465	3538	0.812465	2828	710	79.9322
	2022-04-01	Narail Sadar Upazila	13	272872	3652	1.33836	2831	821	77.5192
	2022-04-01	Nagarpur Upazila	12	288092	4823	1.67412	3297	1526	68.3599
	2022-04-01	Delduar Upazila	8	188449	3500	1.85727	2866	634	81.8857
	2022-04-01	Santhia Upazila	10	395313	3673	0.929137	2938	735	79.9891
	Tangail Districts (2nd Round)
	2022-04-22	Tangail Sadar Upazila	12	521104	4849	0.930524	3488	1361	71.9324
	2022-04-22	Dhanbari Upazila	7	183283	3120	1.70229	2356	764	75.5128
	2022-04-22	Madhupur Upazila	11	296729	4121	1.38881	3369	752	81.752
	2022-04-22	Ghatail Upazila	14	434300	4356	1.00299	3918	438	89.9449
	2022-04-22	Mirzapur Upazila	14	423708	6916	1.63226	5386	1530	77.8774
	2022-04-22	Gopalpur Upazila	7	274273	2651	0.966555	2054	597	77.4802
	2022-04-22	Bhuapur Upazila	6	190910	1985	1.03976	1634	351	82.3174
	2022-04-22	Basail Upazila	6	160346	3078	1.9196	2284	794	74.204
	2022-05-22	Karimganj Upazilla	11	251820	2775	1.10198	2391	384	86.1622
	2022-05-22	Katiadi Upazilla	9	314529	2623	0.833945	2336	287	89.0583
	2022-05-22	Nandail Upazilla	12	402717	3733	0.926954	2015	1718	53.978
	2022-06-02	Ullahpara Upazilla	14	540156	3797	0.702945	3200	597	84.2771
	2022-06-02	Shibganj Upazilla	12	427913	4025	0.940612	3324	701	82.5839
	2022-06-02	Birampur Upazilla	7	170806	2786	1.63109	2311	475	82.9505
	2022-06-02	Faridganj Upazilla	15	396683	2407	0.606782	2246	161	93.3112
	2022-06-02	Bhanga Upazilla	12	232386	4693	2.01948	3784	909	80.6307
	2022-06-02	Faridpur Sadar Upazilla	11	511228	5177	1.01266	3789	1388	73.1891
	Pabna Districts (3rd Round)							0
	2022-06-16	Pabna Sadar Upazila	10	720914	4056	0.562619	3154	902	77.7613
	2022-06-16	Faridpur Upazila	6	135491	2354	1.73738	2181	173	92.6508
	2022-06-16	Bera Upazila	9	256793	2914	1.13477	2699	215	92.6218
	2022-06-16	Ishurdi Upazila	7	313932	2991	0.952754	2144	847	71.6817
	2022-06-16	Sujanagar Upazila	10	251192	3681	1.46541	2955	726	80.2771
	2022-06-16	Chatmohar Upazila	11	287790	3486	1.2113	2893	593	82.9891
	Pabna Districts (3rd Round)
	2022-10-07	Atghoria Upazila	5	157254	1850	1.17644	1498	352	80.973
	2022-10-07	Bhangura Upazila	6	132758	810	0.610133	716	94	88.3951
	Patuakhali Districts (2nd Round)
	2022-10-07	Patuakhali Sadar Upazila	12	322713	5714	1.77061	3910	1804	68.4284
	2022-10-07	Kolapara Upazila	12	237831	3984	1.67514	3139	845	78.7902
	2022-10-07	Mirjaganj Upazila	6	118054	1780	1.50778	1387	393	77.9213
	2022-10-07	Golachipa Upazila	12	258525	3180	1.23006	2586	594	81.3208
	2022-10-07	Dosmina Upazila	6	118180	3067	2.59519	2339	728	76.2634
	2022-10-07	Rangabali Upazila	5	104128	2586	2.48348	2022	564	78.1903
	2022-10-07	Dumki Upazila	5	123525	1331	1.07751	1069	262	80.3156
	2022-10-07	Baufol Upazila	14	304951	3210	1.05263	2625	585	81.7757
	Pirojpur Districts (2nd Round)
	2022-10-07	Mothbaria Upazila	11	262841	3886	1.47846	2830	1056	72.8255
	2022-10-07	Najirpur Upazila	9	180408	2423	1.34307	2128	295	87.825
	2022-10-07	Pirojpur Sadar Upazila	7	163470	2786	1.70429	2383	403	85.5348
	2022-10-07	Necharabad Upazila	10	212232	2508	1.18173	2019	489	80.5024
	2022-10-07	Indukani Upazila	3	77674	1273	1.6389	1074	199	84.3676
	2022-10-07	Kaukhali Upazila	5	70515	1523	2.15982	1282	241	84.176
	2022-10-07	Bhandaria Upazila	7	164618	1337	0.812183	1133	204	84.742
	Barguna Districts (2nd Round)
	2022-10-07	Barguna Sadar Upazila	10	237560	3278	1.37986	2805	473	85.5705
	2022-10-07	Pathorghata Upazila	7	163927	3534	2.15584	3165	369	89.5586
	2022-10-07	Betagi Upazila	7	121751	2918	2.39669	2514	404	86.1549
	2022-10-07	Amtoly Upazila	7	152562	2141	1.40336	1723	418	80.4764
	2022-10-07	Taltoly Upazila	7	88004	2417	2.74647	1995	422	82.5403
	2022-10-07	Bamna Upazila	4	79564	1202	1.51073	1086	116	90.3494
	Bhola Districts (2nd Round)
	2022-10-07	Bhola Sadar Upazila	13	409460	3192	0.779563	2295	897	71.8985
	2022-10-07	Borhanuddin Upazila	9	233860	3185	1.36193	2416	769	75.8556
	2022-10-07	Monpur Upazila	4	125000	1645	1.316	1528	117	92.8875
	2022-10-07	Doulatkhan Upazila	9	173253	1536	0.886565	1214	322	79.0365
	2022-10-07	Chorfession Upazila	21	456437	3520	0.771191	2771	749	78.7216
	2022-10-07	Lalmohon Upazila	9	283889	2239	0.788689	1725	514	77.0433
	2022-10-07	Tojumudden Upazila	5	136240	2134	1.56635	1544	590	72.3524
	Chandpur District (2nd Round)
	2022-10-28	Sharasti Upazila	10	303013	1384	0.456746	1160	224	83.815
	2022-10-28	Haimchar Upazila	6	131490	1645	1.25105	1420	225	86.3222
	2022-10-28	Hajiganj Upazila	11	392840	2467	0.627991	1690	777	68.5043
	2022-10-28	Chandpur Sadar Upazila	14	440430	2640	0.599414	2320	320	87.8788
	2022-10-28	Kachua Upazila	12	458566	1874	0.408665	1581	293	84.365
	2022-10-28	Matlab North Upazila	14	595881	2035	0.341511	1772	263	87.0762
	2022-10-28	Faridganj Upazila	15	613502	2898	0.47237	2668	230	92.0635
	2022-10-28	Matlab South Upazila	6	252060	2001	0.793859	1738	263	86.8566
	Cumilla District (2nd Round)
	2022-10-28	Muradnargar Upazila	22	695679	4516	0.64915	4020	496	89.0168
	2022-10-28	Monohorgonj Upazila	11	307836	3051	0.991112	2797	254	91.6749
	2022-10-28	Chowddagram Upazila	13	514345	4570	0.888509	3918	652	85.733
	2022-10-28	Burichang Upazila	9	366798	1907	0.519905	1416	491	74.2528
	2022-10-28	Nanglkot Upazila	12	443582	3157	0.711706	2903	254	91.9544
	2022-10-28	Brahmanpara Upazila	8	268214	2177	0.811665	1728	449	79.3753
	2022-10-28	Homna Upazila	9	247663	2492	1.00621	2154	338	86.4366
	2022-10-28	Laksam Upazila	7	331411	2188	0.660207	1859	329	84.9634
	2022-10-28	Comilla City Corporation (3rd Round)	30	700000	4691	0.670143	3525	1166	75.1439
	2022-10-28	Comilla Sadar Upazila	6	631627	2388	0.378071	2180	208	91.2898
	2022-10-28	Lalmai Upazila	9	227576	1340	0.588814	993	347	74.1045
	2022-10-28	Barura Upazila	15	486733	4471	0.918573	3354	1117	75.0168
	2022-10-28	Debidwar Upazila	13	513495	3092	0.602148	2256	836	72.9625
	2022-10-28	Chandina Upazila	13	366984	2525	0.688041	1991	534	78.8515
	2022-10-28	Meghna Upazila	8	155665	1890	1.21415	1598	292	84.5503
	2022-10-28	South Sadar Upazila	14	498040	1260	0.252992	970	290	76.9841
	2022-10-28	Titas Upazila	9	207877	3159	1.51965	2541	618	80.4368
	2022-10-28	Daudkandi Upazila	15	415923	3594	0.864102	2859	735	79.5492
	Barisal Districts (2nd Round)
	2022-11-13	Barisal Sadar Upazila	10	198739	2659	1.33794	2310	349	86.8748
	2022-11-13	Muladi Upazila	7	174775	2041	1.16779	1639	402	80.3038
	2022-11-13	Gournodi Upazila	7	280517	2149	0.766085	1817	332	84.551
	2022-11-13	Mehendiganj Upazila	13	304064	2344	0.77089	1714	630	73.1229
	2022-11-13	Barisal City Corporation (3rd Round)	30	1000000	3947	0.3947	3305	642	83.7345
	2022-11-13	Babuganj Upazila	6	146740	2042	1.39158	1806	236	88.4427
	2022-11-13	Wazirpur Upazila	9	234959	2688	1.14403	2278	410	84.747
	2022-11-13	Bakerganj Upazila	14	313845	3689	1.17542	3347	342	90.7292
	2022-11-13	Agailjhara Upazila	5	149456	2058	1.37699	1740	318	84.5481
	2022-11-13	Hizla Upazila	6	187329	2211	1.18028	1967	244	88.9643
	2022-11-13	Banaripara Upazila	8	160498	1328	0.827425	1023	305	77.0331
	Jhalokati Districts (2nd Round)
	2022-11-13	Rajapur Upazila	6	149112	1587	1.0643	1309	278	82.4827
	2022-11-13	Jhalokati Sadar Upazila	10	194020	2315	1.19318	2069	246	89.3737
	2022-11-13	Nalchity Upazila	10	214418	2572	1.19953	2311	261	89.8523
	2022-11-13	Kathalia Upazila	6	124271	1626	1.30843	1159	467	71.2792
	Bagerhat District (2nd Round)
	2022-11-13	Bagerhat sadar Upazila	10	286989	3122	1.08785	2540	582	81.3581
	2022-11-13	Fakirhat Upazila	8	145862	3821	2.6196	2300	1521	60.1937
	2022-11-13	Mollahat Upazila	7	130078	3456	2.65687	2999	457	86.7766
	2022-11-13	Soronkhola Upazila	4	123786	2282	1.8435	1824	458	79.9299
	2022-11-13	Rampal Upazila	10	154538	3157	2.04286	2795	362	88.5334
	2022-11-13	Morolganj Upazila	16	296538	4652	1.56877	4073	579	87.5537
	2022-11-13	Mongla Upazila	6	178530	2719	1.52299	2133	586	78.448
	2022-11-13	Kachua Upazila	7	97011	1851	1.90803	1523	328	82.2798
	2022-11-13	Chitolmari Upazila	7	138810	2105	1.51646	1569	536	74.5368
	Dhaka District (3rd Round)
	2022-12-01	Savar Upazila	12	1442854	5538	0.383823	4707	831	84.9946
	2022-12-01	Keraniganj Upazila	12	603114	6354	1.05353	5476	878	86.1819
	2022-12-01	Nawabganj Upazila	14	335757	4402	1.31107	3566	836	81.0086
	2022-12-01	Dhamrai Upazila	16	412418	6068	1.47132	5286	782	87.1127
	2022-12-01	Dohar Upazila	8	226439	1996	0.881474	1719	277	86.1222
	Dhaka City Corporation (3rd Round)
	Dhaka South City Corporation (3rd Round)
	2022-11-30	DSCC Zone-1		1	1894	189400	1623	271	85.6917
	2022-11-30	DSCC Zone-2		1	6467	646700	5283	1184	81.6917
	2022-11-30	DSCC Zone-3		1	7622	762200	6891	731	90.4093
	2022-11-30	DSCC Zone-4		1	3026	302600	2600	426	85.922
	2022-11-30	DSCC Zone-5		1	7851	785100	7342	509	93.5167
	2022-11-30	DSCC Zone-6		1	1322	132200	1223	99	92.5113
	2022-11-30	DSCC Zone-7		1	2155	215500	2105	50	97.6798
	2022-11-30	DSCC Zone-8		1	2262	226200	2158	104	95.4023
	2022-11-30	DSCC Zone-9		1	2823	282300	2684	139	95.0762
	2022-11-30	DSCC Zone-10		1	2189	218900	2069	120	94.518
	Dhaka North City Corporation (3rd Round)
	2022-11-30	DNCC Zone-1		1	1161	116100	1088	73	93.7123
	2022-11-30	DNCC Zone-2		1	6184	618400	5166	1018	83.5382
	2022-11-30	DNCC Zone-3		1	5503	550300	5116	387	92.9675
	2022-11-30	DNCC Zone-4		1	6497	649700	5879	618	90.4879
	2022-11-30	DNCC Zone-5		1	4104	410400	3462	642	84.3567
	2022-11-30	DNCC Zone-6		1	2240	224000	1827	413	81.5625
	2022-11-30	DNCC Zone-7		1	2426	242600	2185	241	90.066
	2022-11-30	DNCC Zone-8		1	1994	199400	1709	285	85.7071
	2022-11-30	DNCC Zone-9		1	1451	145100	1350	101	93.0393
	2022-11-30	DNCC Zone-10		25498707	1727	0.00677289	1573	154	91.0828
	Jessore District (2nd Round)
	2023-01-19	Jessore sadar Upazila	15	615903	6361	1.03279	5415	946	85.1281
	2023-01-19	Monirampur Upazila	17	382465	4694	1.2273	4125	569	87.8781
	2023-01-19	Avoynagar Upazila	8	262464	3678	1.40134	3200	478	87.0038
	2023-01-19	Bhagarpara Upazila	9	216897	3215	1.48227	2900	315	90.2022
	2023-01-19	Chaugacha Upazila	11	211065	4118	1.95106	3325	793	80.7431
	2023-01-19	Jikorgacaha Upazila	11	271014	3560	1.31359	2884	676	81.0112
	2023-01-19	Kesobpur Upazila	9	253291	2992	1.18125	2508	484	83.8235
	2023-01-19	Sarsha Upazila	12	302678	3546	1.17154	2780	766	78.3982
	Khulna District (2nd Round)
	2023-01-19	Khulna City Corporation (3rd Round)	31	388811	6846	1.76075	5958	888	87.0289
	2023-01-19	Phultola Upazila	4	133327	2111	1.58333	1743	368	82.5675
	2023-01-19	Dumuria Upazila	14	319968	3679	1.1498	3287	392	89.3449
	2023-01-19	Paikgacaha Upazila	10	247983	4113	1.65858	3654	459	88.8403
	2023-01-19	Rupsha Upazila	5	167604	2707	1.61512	2421	286	89.4348
	2023-01-19	Dhigholia Upazila	6	153921	2571	1.67034	2280	291	88.6814
	2023-01-19	Tarokanda Upazila	6	118554	3209	2.70678	2548	661	79.4017
	2023-01-19	Botiaghata Upazila	7	173495	3493	2.01331	2899	594	82.9946
	2023-01-19	Dakop Upazila	9	158896	3659	2.30276	3150	509	86.0891
	2023-01-19	Koira Upazila	7	192534	3029	1.57323	2685	344	88.6431
	Narail District (2nd Round)
	2023-01-19	Narail Sadar Upazila	13	327446	5168	1.57828	4358	810	84.3266
	2023-01-19	Lohagara Upazila	12	272936	3136	1.14899	2613	523	83.3227
	2023-01-19	Kalia Upazila	14	249628	3376	1.35241	2926	450	86.6706
	Chuadanga District (2nd Round)
	2023-02-10	Chuadanga Sadar Upazila	7	376722	4911	1.30361	4261	650	86.7644
	2023-02-10	Alamdanga Upazila	15	415106	4301	1.03612	3664	637	85.1895
	2023-02-10	Damurhuda Upazila	7	306334	4594	1.49967	3586	1008	78.0583
	2023-02-10	Jibannagar Upazila	6	224170	2698	1.20355	2283	415	84.6182
	Magura Districts (2nd Round)
	2023-02-10	Magura Sadar Upazila	13	397792	6592	1.65715	6051	541	91.7931
	2023-02-10	Shalikha Upazila	7	196389	3032	1.54387	2768	264	91.2929
	2023-02-10	Sreepur Upazila	8	207716	2673	1.28685	2355	318	88.1033
	2023-02-10	Mohammadpur Upazila	8	226512	3675	1.62243	2456	1219	66.8299
	Meherpur District (2nd Round)
	2023-02-10	Meherpur Sadar Upazila	5	307970	4463	1.44917	4027	436	90.2308
	2023-02-10	Mujibnagar Upazila	4	118971	2466	2.07277	2300	166	93.2685
	2023-02-10	Gangni Upazila	9	359528	7022	1.95312	4922	2100	70.094
	Satkhira District (2nd Round)
	2023-02-10	Satkhira sadar Upazila	14	459987	5643	1.22677	5016	627	88.8889
	2023-02-10	Tala Upazila	12	299040	4328	1.4473	3685	643	85.1433
	2023-02-10	Assasuni Upazila	11	292292	3892	1.33155	3412	480	87.667
	2023-02-10	Debhata Upazila	5	151717	2080	1.37097	1698	382	81.6346
	2023-02-10	Samnagar Upazila	12	318254	3155	0.991347	2621	534	83.0745
	2023-02-10	Kaliganj Upazila	12	325635	4469	1.3724	3964	505	88.6999
	2023-02-10	Kalaroa Upazila	12	262393	3830	1.45964	3247	583	84.7781
	Kushtia District (2nd Round)
	2023-03-03	Kushtia Sadar Upazila	14	508581	5665	1.11388	4957	708	87.5022
	2023-03-03	Kumarkhali Upazila	11	409506	4463	1.08985	3687	776	82.6126
	2023-03-03	Khoksa Upazila	9	160813	2470	1.53595	2096	374	84.8583
	2023-03-03	Mirpur Upazila	13	339312	6308	1.85906	5768	540	91.4394
	2023-03-03	Daulatpur Upazila	14	532752	6128	1.15025	5386	742	87.8916
	2023-03-03	Bheramara Upazila	6	240100	2649	1.10329	2197	452	82.937
	Jhenaidah District (2nd Round)
	2023-03-03	Jhenaidah Sadar Upazila	17	472982	7267	1.53642	6254	1013	86.0603
	2023-03-03	Shailkupa Upazila	14	433977	5181	1.19384	4219	962	81.4322
	2023-03-03	Harinakundu Upazila	8	237267	5165	2.17687	4511	654	87.3379
	2023-03-03	Kaliganj Upazila	11	302931	5652	1.86577	4803	849	84.9788
	2023-03-03	Kotchandpur Upazila	5	169345	2195	1.29617	1710	485	77.9043
	2023-03-03	Moheshpur Upazila	12	399016	5654	1.41699	4376	1278	77.3965
	2023-03-23	Teknaf Upazila		263389	5997	2.27686	5120	877	85.376
	Rajbari Districts (2nd Round)
	2023-04-13	Rajbari sadar Upazila	14	246389	4981	2.0216	3980	1001	79.9036
	2023-04-13	Goalando Upazila	4	138257	2080	1.50444	1716	364	82.5
	2023-04-13	PanshaUpazila	10	241067	4006	1.66178	2794	1212	69.7454
	2023-04-13	Kalukhali Upazila	7	155044	2174	1.40218	1999	175	91.9503
	2023-04-13	Balaiakandi Upazila	7	207086	2591	1.25117	2019	572	77.9236
	2023-04-13	Singra Upazila	12	320818	4997	1.55758	3424	1573	68.5211
	2023-04-13	Manda Upazila	14	352560	4299	1.21937	3678	621	85.5548
	Gopalganj Districts (2nd Round)
	2023-04-13	Gopalganj sadar Upazila	21	321934	6729	2.09018	5487	1242	81.5426
	2023-04-13	Kotalipara Upazila	12	227025	4735	2.08567	4242	493	89.5882
	2023-04-13	Muksudpur Upazila	16	288205	3160	1.09644	2777	383	87.8797
	2023-04-13	Tungipara Upazila	5	99462	2522	2.53564	2178	344	86.36
	2023-04-13	Kashiani Upazila	14	228647	3361	1.46995	2871	490	85.421
		Grand Total	9912	371291843	3355153	0.903643	2735140	620107	0.815206

## Sheet: District based
	Mass Dog Vaccination (MDV) coverage in Bangladesh
				1st Round					2nd Round					3rd Round
	No	Districts	Humen Popula: (2011)	Est: dogs	% Humen to Dog	Dogs Vacc:	N: Vacci: Dogs	Coverage(%)	Est: dogs	% Humen to Dog	Dogs Vacc:	N: Vacci: Dogs	Coverage(%)	Est: dogs	% Humen to Dog	Dogs Vacc:	N: Vacci: Dogs	Coverage(%)
	1	Gaibandha District	2247246	25238	1.12306	19660	5578	77.8984	26974	1.20031	21644	5330	80.2402	27482	1.22292	21867	5615	79.5684
	2	Sirajganj District	3008144	33565	1.1158	24864	8701	74.0772	32710	1.08738	25339	7371	77.4656	32120	1.06777	23966	8154	74.6139
	3	Pabna District	2631995	26409	1.00338	20147	6262	76.2884	30464	1.15745	23490	6974	77.1074	22142	0.841263	18240	3902	82.3774
	4	Gazipur District	3504860	38811	1.10735	29975	8836	77.2333	31392	0.895671	25296	6096	80.581	12724	0.363039	9993	2731	78.5366
	5	Manikganj District	1511872	27260	1.80306	20777	6483	76.2179	25238	1.66932	19660	5578	77.8984	23360	1.5451	19267	4093	82.4786
	6	Madaripur District	1434393	23991	1.67255	20206	3785	84.2233	16499	1.15024	13552	2947	82.1383	12781	0.891039	10227	2554	80.0172
	7	Narsingdi District	2223455	22200	0.998446	18924	3276	85.2432	16764	0.753962	14125	2639	84.2579
	8	Narayanganj District	2598451	16131	0.620793	12176	3955	75.482	22897	0.881179	18104	4793	79.0671
	9	Munshiganj District	1493700	20354	1.36266	15990	4364	78.5595	14366	0.961773	11294	3072	78.6162
	10	Jamalpur District	2222872	19287	0.867661	15035	4252	77.9541	21904	0.985392	17755	4149	81.0583
	11	Sherpur District	1299839	15599	1.20007	12277	3322	78.7038	17552	1.35032	15010	2542	85.5173
	12	Mymensingh District	5388308	54149	1.00494	43298	10851	79.9608	47211	0.876175	37383	9828	79.1828
	13	kishoreganj District	3163428	31193	0.986051	26002	5191	83.3584	32261	1.01981	25967	6294	80.4904
	14	Netrokona District	2265189	28966	1.27875	23587	5379	81.43	24337	1.07439	20377	3960	83.7285
	15	Tangail District	3637832	44390	1.22023	35409	8981	79.768	37366	1.02715	29939	7427	80.1236
	16	Sylhet District	3651222	32348	0.88595	26708	5640	82.5646	26486	0.725401	21552	4934	81.3713
	17	Sunamganj District	2132460	25377	1.19003	22044	3333	86.8661	29563	1.38633	22164	7399	74.9721
	18	Moulvibazar District	1838265	20755	1.12905	18310	2445	88.2197	20835	1.13341	16475	4360	79.0737
	19	Habiganj District	1926803	20985	1.08911	17895	3090	85.2752	17315	0.898639	14214	3101	82.0907
	20	Kurigram District	1798635	21724	1.2078	18363	3361	84.5286
	21	Rangpur District	2146666	27104	1.26261	23058	4046	85.0723
	22	Dinajpur District	2642850	38456	1.4551	31527	6929	81.982	32715	1.23787	25205	7510	77.0442
	23	Panchagarh District	836196	13266	1.58647	10449	2817	78.7653	10848	1.2973	8158	2690	75.2028
	24	Nilphamari District	1651221	21827	1.32187	17158	4669	78.6091	26719	1.61814	19333	7386	72.3567	18451	1.11742	14608	3843	79.1719
	25	Lalmonirhat District	1109343	15642	1.41002	12134	3508	77.5732
	26	Thakurgaon District	1214376	19623	1.61589	16370	3253	83.4225
	27	Naogaon District	2391355	45426	1.89959	37794	7632	83.199
	28	Bogra District	3247421	47962	1.47693	39986	7976	83.3702
	29	Rajshahi District	2286874	41660	1.8217	33275	8385	79.8728
	30	Natore District	1650640	24671	1.49463	20000	4671	81.0668
	31	Chapainawabganj District	1425322	17052	1.19636	13724	3328	80.4832
	32	Joypurhat District	990035	16432	1.65974	13903	2529	84.6093
	33	Faridpur District	1794943	27167	1.51353	21365	5802	78.6432
	34	Gopalganj District	1165273	18430	1.5816	15169	3261	82.306	20507	1.75985	17555	2952	85.6049
	35	Rajbari District	987843	14943	1.51269	11530	3413	77.1599	15832	1.60268	12508	3324	79.0045
	36	Satkhira District	2109318	27148	1.28705	21950	5198	80.8531	27397	1.29886	23643	3754	86.2978
	37	Bagerhat District	1552142	25281	1.62878	21152	4129	83.6676	27165	1.75016	21756	5409	80.0883
	38	Jessore District	2515777	28876	1.1478	22558	6318	78.1202	32164	1.27849	27137	5027	84.3707
	39	Khulna District	2055093	28535	1.3885	23884	4651	83.7007	35417	1.72338	30625	4792	86.4698
	40	Dhaka District	27818629	74932	0.269359	65412	9520	87.2951	79986	0.287527	69711	10275	87.154	95256	0.342418	84087	11169	88.2748
	41	Meherpur District	786469	11204	1.4246	9123	2081	81.4263	13951	1.77388	11249	2702	80.6322
	42	Kushtia District	2191064	25501	1.16386	20612	4889	80.8282	27683	1.26345	24091	3592	87.0245
	43	Chuadanga District	1322332	19611	1.48306	15694	3917	80.0265	16504	1.2481	13794	2710	83.5797
	44	Narail District	850010	9684	1.13928	7819	1865	80.7414	11680	1.3741	9897	1783	84.7346
	45	Jhenaidah District	2015518	29278	1.45263	24133	5145	82.4271	31114	1.54372	25873	5241	83.1555
	46	Magura District	1028409	13103	1.2741	8957	4146	68.3584	15972	1.55308	13630	2342	85.3368
	47	Barisal District	3150922	34658	1.09993	29089	5569	83.9316	27156	0.861843	22946	4210	84.497
	48	Jhalokathi District	681821	10619	1.55745	9004	1615	84.7914	8100	1.188	6848	1252	84.5432
	49	Patuakhali District	1587907	27807	1.75117	23881	3926	85.8813	24852	1.56508	19077	5775	76.7624
	50	Pirojpur District	1131758	16808	1.48512	14523	2285	86.4053	15736	1.3904	12849	2887	81.6535
	51	Barguna District	843421	18990	2.25154	16422	2568	86.4771	15490	1.83657	13288	2202	85.7844
	52	Bhola District	1818139	18208	1.00146	13887	4321	76.2687	17451	0.959828	13493	3958	77.3194
	53	Brahmanbaria District	3327589	26854	0.807011	21315	5539	79.3737
	54	Feni District	1487494	14042	0.944004	11533	2509	82.1322
	55	Noakhali District	3486663	34226	0.981626	28383	5843	82.9282
	56	Chandpur District	3187782	20099	0.630501	16494	3605	82.0638	14943	0.468759	12611	2332	84.394
	57	Cumilla District	7379448	50362	0.682463	40542	9820	80.5012	52468	0.711002	43062	9406	82.0729
	58	Shariatpur District	1080000	16214	1.5013	13201	3013	81.4173
	59	Laksmipur District	1729000	15105	0.873626	11972	3133	79.2585
	60	Chittagong District	7913365	64948	0.820738	50319	14629	77.4758
	61	Khagrachhari District	549835	19470	3.54106	16744	2726	85.999
	62	Rangamati District	695042	16932	2.43611	14558	2374	85.9792
	63	Bandarban District	442302	19728	4.4603	17342	2386	87.9055
	64	Coxs bazar District	2386302	35746	1.49797	29873	5873	83.5702
		Total	162642878	1692362	1.04054	1379465	199600	81.5112	1093984	0.67263	891679	202305	81.5075	244316	0.150216	202255	42061	82.7842
	No	Districts	Human Popula:	Est: dogs	% Humen to Dog	Dogs Vacc:	N: Vacci: Dogs	Coverage(%)	Est: dogs	% Humen to Dog	Dogs Vacc:	N: Vacci: Dogs	Coverage(%)	Est: dogs	% Humen to Dog	Dogs Vacc:	N: Vacci: Dogs	Coverage(%)
	Zoonotic Disease Control program has given 27 lakh 36 thousands doses of Anti- Rabies vaccine during Mass Dog vaccination program throughout the country Since 2011
